# Supplementary material for: Description of two new Apseudopsis species (A. larnacensis sp. nov and A. salinus sp. nov.) (Tanaidacea: Crustacea) from the Mediterranean and a biogeographic overview of the genus
Source: PeerJ. 2024 Dec 24;12:e18740. doi: 10.7717/peerj.18740 (PMC11674147; doi:10.7717/peerj.18740)
Supplement: Supplemental Information 1 — The coordinates, depth and year of collection collected for all Apseudopsis representatives. [file peerj-12-18740-s001.xlsx]

## Sheet: Sheet1
scientificName	decimalLatitude	decimalLongitude	depth	year	catalogNumber	source
Apseudopsis acutifrons	37.8	15.26	#N/A	#N/A	F15647	online databases
Apseudopsis elisae*	32.9301	34.8503	601	#N/A	#N/A	Lubinevsky et al., 2022	* not certain
Apseudopsis elisae*	32.9202	34.8802	303	#N/A	#N/A	Lubinevsky et al., 2022	* not certain
Apseudopsis acutifrons	40.501	24.037	#N/A	1937	MarBEF/MacroBEN_734969	online databases
Apseudopsis acutifrons	40.559	23.86	#N/A	1937	MarBEF/MacroBEN_734970	online databases
Apseudopsis acutifrons	40.594	23.783	#N/A	1937	MarBEF/MacroBEN_734967	online databases
Apseudopsis acutifrons	40.784	23.856	#N/A	1937	MarBEF/MacroBEN_734968	online databases
Apseudopsis acutifrons	40.8333	14.25	#N/A	#N/A	11755	online databases
Apseudopsis acutifrons	43.205	28.4733	64	1995	446243	online databases
Apseudopsis acutifrons	43.2658	28.1297	24	1995	446199	online databases
Apseudopsis acutifrons	43.3544	28.5662	50	1995	446224	online databases
Apseudopsis acutifrons	43.747	28.7975	51	1995	446148	online databases
Apseudopsis acutifrons	43.9991	29.3651	56	1995	446594	online databases
Apseudopsis acutifrons	44.3651	30.0089	69	1995	446284	online databases
Apseudopsis acutifrons	44.4066	33.6928	58	1995	445737	online databases
Apseudopsis acutifrons	44.4096	33.7032	#N/A	1996	734972_urn:lsid:marinespecies.org:taxname:136257	online databases
Apseudopsis acutifrons	44.41	33.7	21	#N/A	3556	online databases
Apseudopsis acutifrons	44.42	33.7	10	#N/A	3948	online databases
Apseudopsis acutifrons	44.4406	34.2671	#N/A	1982	734971_urn:lsid:marinespecies.org:taxname:136257	online databases
Apseudopsis acutifrons	44.4556	34.2631	#N/A	1980	734973_urn:lsid:marinespecies.org:taxname:136257	online databases
Apseudopsis acutifrons	44.46	34.23	80	#N/A	2568	online databases
Apseudopsis acutifrons	44.47	34.23	76	#N/A	2512	online databases
Apseudopsis acutifrons	44.7692	35.1025	#N/A	1986	734974_urn:lsid:marinespecies.org:taxname:136257	online databases
Apseudopsis acutifrons	44.8	35.06	50	#N/A	7275	online databases
Apseudopsis acutifrons	44.8828	31.8765	63	1995	445922	online databases
Apseudopsis acutifrons	45.0064	30.832	57	1995	445682	online databases
Apseudopsis acutifrons	31.8135	34.4815	62	#N/A	#N/A	Bamber et al.,2009
Apseudopsis acutifrons	40.8206	14.2634	#N/A	#N/A	#N/A	Gutu, 2002
Apseudopsis acutifrons	44.1027	9.83375	#N/A	#N/A	#N/A	Sars, 1882
Apseudopsis acutifrons	40.8333	14.25	#N/A	#N/A	1928.12.1.713-715	online databases
Apseudopsis acutifrons	40.8392	14.2402	#N/A	1887	1911.11.8.7158-7177	online databases
Apseudopsis acutifrons	43.205	28.4733	64	1995	446243	online databases
Apseudopsis acutifrons	43.2658	28.1297	24	1995	446199	online databases
Apseudopsis acutifrons	43.3544	28.5662	50	1995	446224	online databases
Apseudopsis acutifrons	43.747	28.7975	51	1995	446148	online databases
Apseudopsis acutifrons	43.9991	29.3651	56	1995	446105	online databases
Apseudopsis acutifrons	44.3651	30.0089	69	1995	445712	online databases
Apseudopsis acutifrons	44.4066	33.6928	58	1995	445737	online databases
Apseudopsis acutifrons	44.8828	31.8765	63	1995	445922	online databases
Apseudopsis acutifrons	45.0064	30.832	57	1995	445682	online databases
Apseudopsis adami	48.7083	-3.86617	#N/A	2021	c2f5cd7a917f972e319c60800836_60800836_737372_90dce3e84e	online databases
Apseudopsis adami	37.1174	-7.62828	#N/A	#N/A	#N/A	Carvalho et al., 2019
Apseudopsis adami	37.1325	-7.60278	#N/A	#N/A	#N/A	Carvalho et al., 2019
Apseudopsis adami	37.1337	-7.59877	#N/A	#N/A	#N/A	Carvalho et al., 2019
Apseudopsis adami	37.1412	-7.58217	#N/A	#N/A	#N/A	Carvalho et al., 2019
Apseudopsis adami	37.0988	-7.62942	#N/A	#N/A	#N/A	Carvalho et al., 2019
Apseudopsis adami	37.0949	-7.62553	#N/A	#N/A	#N/A	Carvalho et al., 2019
Apseudopsis adami	41.7	-9.01667	#N/A	#N/A	#N/A	Esquete and Bamber, 2012
Apseudopsis adami	42.6833	-9.0167	#N/A	#N/A	#N/A	García Herrero et al., 2021
Apseudopsis adami	43.4608	-8.20328	#N/A	2018	#N/A	online databases
Apseudopsis annabensis	34.4025	10.2879	1.98	#N/A	#N/A	Esquete et al., 2019
Apseudopsis annabensis	34.341	10.2154	3.53	#N/A	#N/A	Esquete et al., 2019
Apseudopsis annabensis	34.3429	10.1982	2.83	#N/A	#N/A	Esquete et al., 2019
Apseudopsis annabensis	34.3213	10.1641	6.08	#N/A	#N/A	Esquete et al., 2019
Apseudopsis annabensis	34.318	10.1481	7.63	#N/A	#N/A	Esquete et al., 2019
Apseudopsis annabensis	34.3097	10.1582	11.9	#N/A	#N/A	Esquete et al., 2019
Apseudopsis annabensis	34.3254	10.172	0.87	#N/A	#N/A	Esquete et al., 2019
Apseudopsis apocryphus	31.9351	34.6822	19.3	#N/A	#N/A	Lubinevsky et al., 2022
Apseudopsis apocryphus	32.789	34.948	9.7	#N/A	#N/A	Lubinevsky et al., 2022
Apseudopsis apocryphus	32.8381	35.0239	16.3	#N/A	#N/A	Lubinevsky et al., 2022
Apseudopsis apocryphus	32.9006	35.0653	9.8	#N/A	#N/A	Lubinevsky et al., 2022
Apseudopsis apocryphus	32.9091	35.0682	10.5	#N/A	#N/A	Lubinevsky et al., 2022
Apseudopsis apocryphus	32.918	35.073	6.6	#N/A	#N/A	Lubinevsky et al., 2022
Apseudopsis apocryphus	32.9328	34.9828	30.7	#N/A	#N/A	Lubinevsky et al., 2022
Apseudopsis apocryphus	34.9271	32.9402	54	#N/A	#N/A	Lubinevsky et al., 2022
Apseudopsis apocryphus	31.894	34.5511	57	#N/A	#N/A	Bamber et al., 2009
Apseudopsis apocryphus	31.8888	34.5476	58	#N/A	#N/A	Bamber et al., 2009
Apseudopsis apocryphus	31.8974	34.555	57	#N/A	#N/A	Bamber et al., 2009
Apseudopsis apocryphus	31.9032	34.554	59	#N/A	#N/A	Bamber et al., 2009
Apseudopsis apocryphus	31.8135	34.4815	62	#N/A	#N/A	Bamber et al., 2009
Apseudopsis apocryphus	32.8285	35.0022	#N/A	#N/A	#N/A	Gutu, 2002
Apseudopsis arguinensis	20.5859	-16.5729	#N/A	#N/A	#N/A	Garcia - Guerra et al., 2021
Apseudopsis arguinensis	20.5662	-16.4479	#N/A	#N/A	#N/A	Gutu, 2002
Apseudopsis bacescui	36.9845	-7.7763	#N/A	#N/A	#N/A	Carvalaho et al., 2019
Apseudopsis bacescui	41.3948	2.2192	#N/A	#N/A	#N/A	Garcia - Guerra et al., 2021
Apseudopsis bacescui	36.9845	-7.7763	#N/A	#N/A	#N/A	Garcia - Guerra et al., 2021
Apseudopsis bacescui	41.3897	2.21436	13	#N/A	#N/A	Gutu, 2002
Apseudopsis bruneinigma	5.35	114.667	60	#N/A	#N/A	Bamber, 1999
Apseudopsis bruneinigma	5.35	114.667	60	#N/A	1998.703	online databases
Apseudopsis caribbeanus	22.5897	-82.2465	12	#N/A	#N/A	Gutu, 2006
Apseudopsis cuanzanus	-9.43333	12.9996	#N/A	2004	28051	Bochert et al. 2012
Apseudopsis elisae	40.501	24.037	#N/A	1937	MarBEF/MacroBEN_734977	online databases
Apseudopsis elisae	40.559	23.86	#N/A	1937	MarBEF/MacroBEN_734978	online databases
Apseudopsis elisae	40.758	23.763	#N/A	1937	MarBEF/MacroBEN_734976	online databases
Apseudopsis elisae	43.7326	7.42911	#N/A	#N/A	#N/A	Bacescu, 1961
Apseudopsis elisae	42.4853	3.1398	#N/A	#N/A	#N/A	Bacescu, 1961
Apseudopsis elisae	32.8342	34.9934	#N/A	#N/A	#N/A	Bacescu, 1961
Apseudopsis erythraeicus	28.5113	34.525	#N/A	#N/A	#N/A	Bacescu, 1984
Apseudopsis formosus	37.0005	-7.9129	#N/A	#N/A	#N/A	Carvalaho et al., 2019
Apseudopsis formosus	37.0016	-7.9834	#N/A	#N/A	#N/A	Carvalaho et al., 2019
Apseudopsis gabesi	34.3254	10.172	1.98	#N/A	#N/A	Esqueteet al., 2019
Apseudopsis gabesi	34.367	10.2773	5.28	#N/A	#N/A	Esqueteet al., 2019
Apseudopsis gabesi	34.3462	10.2456	5.3	#N/A	#N/A	Esqueteet al., 2019
Apseudopsis gabesi	34.3451	10.2964	8.3	#N/A	#N/A	Esqueteet al., 2019
Apseudopsis gabesi	34.7241	11.2977	3.35	#N/A	#N/A	Esqueteet al., 2019
Apseudopsis gabesi	34.7179	11.3035	3.28	#N/A	#N/A	Esqueteet al., 2019
Apseudopsis gabesi	34.7095	11.3123	3.58	#N/A	#N/A	Esqueteet al., 2019
Apseudopsis gabesi	34.4174	10.361	4.43	#N/A	#N/A	Esqueteet al., 2019
Apseudopsis gabesi	34.4137	10.3724	3.75	#N/A	#N/A	Esqueteet al., 2019
Apseudopsis gabesi	34.341	10.2154	3.53	#N/A	#N/A	Esqueteet al., 2019
Apseudopsis gabesi	34.3429	10.1982	2.83	#N/A	#N/A	Esqueteet al., 2019
Apseudopsis gabesi	34.3285	10.1868	3.25	#N/A	#N/A	Esqueteet al., 2019
Apseudopsis gabesi	34.3213	10.1641	6.08	#N/A	#N/A	Esqueteet al., 2019
Apseudopsis gabesi	34.318	10.1481	7.63	#N/A	#N/A	Esqueteet al., 2019
Apseudopsis gabesi	34.3097	10.1582	11.9	#N/A	#N/A	Esqueteet al., 2019
Apseudopsis gabesi	34.4025	10.2879	0.87	#N/A	#N/A	Esqueteet al., 2019
Apseudopsis hastifrons	43.5155	16.3942	#N/A	#N/A	#N/A	Gutu, 2002
Apseudopsis hastifrons	45.6552	13.7514	#N/A	#N/A	#N/A	Gutu, 2002
Apseudopsis isochelatus	18.8607	-16.9855	1000	#N/A	#N/A	Gutu, 2006
Apseudopsis latreillii	37.9335	-8.83818	8.1	2011	MeshAtlantic-2011: RV Diplodus_19	online databases
Apseudopsis latreillii	38.15	-0.441667	40	#N/A	Maerl_Diversity_Species_Inventory_UAC_2468	online databases
Apseudopsis latreillii	38.433	-9.063	20	2007	IPMA_BIOMARES_2007/2009_1128	online databases
Apseudopsis latreillii	38.434	-9.063	10	2007	IPMA_BIOMARES_2007/2009_1089	online databases
Apseudopsis latreillii	38.436	-9.052	30	2007	IPMA_BIOMARES_2007/2009_1014	online databases
Apseudopsis latreillii	38.439	-9.052	10	2007	IPMA_BIOMARES_2007/2009_974	online databases
Apseudopsis latreillii	38.44	-9.04	20	2007	IPMA_BIOMARES_2007/2009_887	online databases
Apseudopsis latreillii	38.444	-9.04	10	2007	IPMA_BIOMARES_2007/2009_858	online databases
Apseudopsis latreillii	38.445	-9.029	10	2007	IPMA_BIOMARES_2007/2009_736	online databases
Apseudopsis latreillii	38.445	-9.029	30	2007	IPMA_BIOMARES_2007/2009_786	online databases
Apseudopsis latreillii	38.45	-9.005	50	2007	IPMA_BIOMARES_2007/2009_536	online databases
Apseudopsis latreillii	38.451	-9.005	30	2007	IPMA_BIOMARES_2007/2009_469	online databases
Apseudopsis latreillii	38.456	-9.005	10	2007	IPMA_BIOMARES_2007/2009_394	online databases
Apseudopsis latreillii	38.457	-8.993	20	2007	IPMA_BIOMARES_2007/2009_252	online databases
Apseudopsis latreillii	38.46	-8.993	10	2007	IPMA_BIOMARES_2007/2009_188	online databases
Apseudopsis latreillii	38.4983	-0.133333	40	#N/A	Maerl_Diversity_Species_Inventory_UAI_2467	online databases
Apseudopsis latreillii	39.01	26.55	21	#N/A	8650	online databases
Apseudopsis latreillii	39.01	26.55	#N/A	1987	735013_urn:lsid:marinespecies.org:taxname:136272	online databases
Apseudopsis latreillii	39.02	26.53	31	#N/A	10514	online databases
Apseudopsis latreillii	39.024	26.533	#N/A	1987	735032_urn:lsid:marinespecies.org:taxname:136272	online databases
Apseudopsis latreillii	39.04	26.5	40	#N/A	8651	online databases
Apseudopsis latreillii	39.047	26.509	#N/A	1987	735015_urn:lsid:marinespecies.org:taxname:136272	online databases
Apseudopsis latreillii	39.07	26.46	8.5	#N/A	10183	online databases
Apseudopsis latreillii	39.07	26.465	#N/A	1987	735009_urn:lsid:marinespecies.org:taxname:136272	online databases
Apseudopsis latreillii	39.07	26.53	15	#N/A	8654	online databases
Apseudopsis latreillii	39.07	26.53	#N/A	1986	735020_urn:lsid:marinespecies.org:taxname:136272	online databases
Apseudopsis latreillii	39.1	26.45	8.25	#N/A	8652	online databases
Apseudopsis latreillii	39.102	26.504	#N/A	1986	735011_urn:lsid:marinespecies.org:taxname:136272	online databases
Apseudopsis latreillii	39.107	26.456	#N/A	1987	735008_urn:lsid:marinespecies.org:taxname:136272	online databases
Apseudopsis latreillii	39.11	26.48	11	#N/A	10715	online databases
Apseudopsis latreillii	39.112	26.484	#N/A	1987	735029_urn:lsid:marinespecies.org:taxname:136272	online databases
Apseudopsis latreillii	39.63	19.95	20	#N/A	5038	online databases
Apseudopsis latreillii	39.63	19.95	51	#N/A	5265	online databases
Apseudopsis latreillii	39.63	20	25	#N/A	5334	online databases
Apseudopsis latreillii	39.63	20	48	#N/A	5264	online databases
Apseudopsis latreillii	39.64	19.93	40	#N/A	4253	online databases
Apseudopsis latreillii	41.4253	9.2436	#N/A	2009	ae8e5467cd8c9ef078bd60231636_60231636_247077_ffbecd45e6	online databases
Apseudopsis latreillii	41.4638	9.008	#N/A	2012	2a18ca7a6fc00571c9e960491836_60491836_247077_ffbecd45e6	online databases
Apseudopsis latreillii	41.4638	9.008	#N/A	2012	Eco laboratory geochemistry Benthic Environments _QUADRIGE - Coastal monitoring database and product_7818	online databases
Apseudopsis latreillii	41.4677	9.2856	#N/A	2018	Universite de Liege Underwater research and oce_QUADRIGE - Coastal monitoring database and product_15132	online databases
Apseudopsis latreillii	41.4677	9.2856	#N/A	2009	7d6d45cface94ec1994d60231634_60231634_247077_ffbecd45e6	online databases
Apseudopsis latreillii	41.6086	9.3146	#N/A	2009	Eco laboratory geochemistry Benthic Environments _QUADRIGE - Coastal monitoring database and product_12488	online databases
Apseudopsis latreillii	41.8903	8.7964	#N/A	2009	486_122-P-114 - Ajaccio sud DC_61019	online databases
Apseudopsis latreillii	42.0133	35.1247	3	2004	75	online databases
Apseudopsis latreillii	42.0136	35.1917	4	2004	72	online databases
Apseudopsis latreillii	42.0256	35.1608	3	2004	73	online databases
Apseudopsis latreillii	42.0483	35.0464	4	2004	71	online databases
Apseudopsis latreillii	42.0617	35.0458	2	2004	70	online databases
Apseudopsis latreillii	42.1322	9.5806	#N/A	2006	c702bb808c8e9f1ea6d460231665_60231665_247077_ffbecd45e6	online databases
Apseudopsis latreillii	42.1327	9.5834	#N/A	2015	2e8f243163323948e97f60633651_60633651_247077_ffbecd45e6	online databases
Apseudopsis latreillii	42.1327	9.5834	#N/A	2012	Eco laboratory geochemistry Benthic Environments _QUADRIGE - Coastal monitoring database and product_3343	online databases
Apseudopsis latreillii	42.248	-8.79067	40	#N/A	Maerl_Diversity_Species_Inventory_USI_2466	online databases
Apseudopsis latreillii	42.2522	-8.76683	40	#N/A	Maerl_Diversity_Species_Inventory_USC_2465	online databases
Apseudopsis latreillii	42.4453	3.1725	#N/A	2012	4f5c390062e313e2318860437908_60437908_247077_ffbecd45e6	online databases
Apseudopsis latreillii	42.4882	3.142	#N/A	2009	CSIC-CEAB/ Centre for Advanced Studies of Blanes (_QUADRIGE - Coastal monitoring database and product_4472	online databases
Apseudopsis latreillii	42.4882	3.142	#N/A	2012	e1008f29b6b49d5a6bc460437648_60437648_247077_ffbecd45e6	online databases
Apseudopsis latreillii	42.5317	3.0894	#N/A	2012	Eco laboratory geochemistry Benthic Environments _QUADRIGE - Coastal monitoring database and product_7485	online databases
Apseudopsis latreillii	42.5317	3.0894	#N/A	2012	09002de8b9d7dd5758ba60437929_60437929_247077_ffbecd45e6	online databases
Apseudopsis latreillii	42.5427	9.5554	#N/A	2009	281df992b6cb1b36840e60231632_60231632_247077_ffbecd45e6	online databases
Apseudopsis latreillii	42.5799	8.7292	#N/A	2006	a05653c949e7d323093c60231669_60231669_247077_ffbecd45e6	online databases
Apseudopsis latreillii	42.5799	8.7305	#N/A	2012	a56e4fb4c21e54dbf26060491822_60491822_247077_ffbecd45e6	online databases
Apseudopsis latreillii	42.5799	8.7292	#N/A	2006	Universite de Liege Underwater research and oce_QUADRIGE - Coastal monitoring database and product_13471	online databases
Apseudopsis latreillii	42.5799	8.7305	#N/A	2012	Eco laboratory geochemistry Benthic Environments _QUADRIGE - Coastal monitoring database and product_13692	online databases
Apseudopsis latreillii	42.6185	9.49948	#N/A	2012	486_115-P-033 - Bastia Sud Marana STEP_72095	online databases
Apseudopsis latreillii	42.8014	9.3339	#N/A	2009	2e40a3805716f66a64dc60231630_60231630_247077_ffbecd45e6	online databases
Apseudopsis latreillii	42.8521	3.0661	#N/A	2012	d79767b664b779979e1560458657_60458657_247077_ffbecd45e6	online databases
Apseudopsis latreillii	42.9645	9.4871	#N/A	2006	9e964e839afb205070c660231664_60231664_247077_ffbecd45e6	online databases
Apseudopsis latreillii	42.9833	9.4974	#N/A	2018	143c678212938a81969760702669_60702669_247077_ffbecd45e6	online databases
Apseudopsis latreillii	43.0031	6.4412	#N/A	2015	CSIC-CEAB/ Centre for Advanced Studies of Blanes (_QUADRIGE - Coastal monitoring database and product_10904	online databases
Apseudopsis latreillii	43.019	6.2743	#N/A	2015	Eco laboratory geochemistry Benthic Environments _QUADRIGE - Coastal monitoring database and product_12240	online databases
Apseudopsis latreillii	43.019	6.2743	#N/A	2018	fa6ab9c803c464fbbd2660702665_60702665_247077_ffbecd45e6	online databases
Apseudopsis latreillii	43.0926	5.965	#N/A	2009	Eco laboratory geochemistry Benthic Environments _QUADRIGE - Coastal monitoring database and product_16205	online databases
Apseudopsis latreillii	43.1023	6.3868	#N/A	2009	aa9462af7aeedb8b6d1f60231619_60231619_247077_ffbecd45e6	online databases
Apseudopsis latreillii	43.1113	5.75075	#N/A	2012	47b90bf202d153508e8d60458689_60458689_247077_ffbecd45e6	online databases
Apseudopsis latreillii	43.1532	3.2044	#N/A	2012	368bc293e1ce15db565060458655_60458655_247077_ffbecd45e6	online databases
Apseudopsis latreillii	43.1777	6.5604	#N/A	2012	52970dbf2265e602532460458699_60458699_247077_ffbecd45e6	online databases
Apseudopsis latreillii	43.1959	5.3799	#N/A	2012	Eco laboratory geochemistry Benthic Environments _QUADRIGE - Coastal monitoring database and product_9109	online databases
Apseudopsis latreillii	43.2043	5.3473	#N/A	2009	fca5603c329ac53c8ec160231623_60231623_247077_ffbecd45e6	online databases
Apseudopsis latreillii	43.2043	5.3473	#N/A	2009	486_111-P-339 - Ile Maire DC_65606	online databases
Apseudopsis latreillii	43.2391	3.4711	#N/A	2012	d50c804d59c1ab7f28c960458661_60458661_247077_ffbecd45e6	online databases
Apseudopsis latreillii	43.2608	3.4781	#N/A	2005	c9780afb646b1ee6dd8660231671_60231671_247077_ffbecd45e6	online databases
Apseudopsis latreillii	43.2658	5.323	#N/A	2015	Eco laboratory geochemistry Benthic Environments _QUADRIGE - Coastal monitoring database and product_12900	online databases
Apseudopsis latreillii	43.2715	3.5398	#N/A	2009	c489c71fab5159f641ef60231534_60231534_247077_ffbecd45e6	online databases
Apseudopsis latreillii	43.3334	4.72022	#N/A	2015	Eco laboratory geochemistry Benthic Environments _QUADRIGE - Coastal monitoring database and product_17283	online databases
Apseudopsis latreillii	43.3371	5.3269	#N/A	2009	486_111-P-341 - Petite jetee DC_67366	online databases
Apseudopsis latreillii	43.3606	4.9293	#N/A	2018	e87a30c498d16263717460702661_60702661_247077_ffbecd45e6	online databases
Apseudopsis latreillii	43.3772	3.7113	#N/A	2009	486_102-P-117 - Sete DC_69532	online databases
Apseudopsis latreillii	43.3855	4.8955	#N/A	2012	89e61fa41514f7bbf1e560458645_60458645_247077_ffbecd45e6	online databases
Apseudopsis latreillii	43.4133	4.50217	#N/A	2009	Eco laboratory geochemistry Benthic Environments _QUADRIGE - Coastal monitoring database and product_16659	online databases
Apseudopsis latreillii	43.4352	4.20583	#N/A	2015	717c73fbc76adf806a9e60633630_60633630_247077_ffbecd45e6	online databases
Apseudopsis latreillii	43.4401	-3.39549	25	2005	IHCantabria_Invert_1593	online databases
Apseudopsis latreillii	43.4466	-7.03474	0	1990	30.sty	online databases
Apseudopsis latreillii	43.4474	-3.46684	0	2021	IHCantabria_Invert_2698	online databases
Apseudopsis latreillii	43.4517	-7.03417	0	1990	28.sty	online databases
Apseudopsis latreillii	43.4622	-3.77394	14	2006	IHCantabria_Invert_2133	online databases
Apseudopsis latreillii	43.4639	-7.03487	0	1990	128-1	online databases
Apseudopsis latreillii	43.473	-7.03454	0	1990	129-1	online databases
Apseudopsis latreillii	43.4738	-7.03339	0	1990	44-1	online databases
Apseudopsis latreillii	43.4866	-7.02494	0	1990	13.sty	online databases
Apseudopsis latreillii	43.4885	-7.02652	0	1990	83-1	online databases
Apseudopsis latreillii	43.4908	-7.02205	0	1990	20.sty	online databases
Apseudopsis latreillii	43.4996	-7.02579	0	1990	33-1	online databases
Apseudopsis latreillii	43.5044	-7.03324	0	1990	45-1	online databases
Apseudopsis latreillii	43.5071	-7.02199	0	1990	38-1	online databases
Apseudopsis latreillii	43.5124	-7.03287	0	1990	70-1	online databases
Apseudopsis latreillii	43.5189	-3.56167	25	2011	IHCantabria_Invert_1184	online databases
Apseudopsis latreillii	43.526	4.0533	#N/A	2018	Eco laboratory geochemistry Benthic Environments _QUADRIGE - Coastal monitoring database and product_8497	online databases
Apseudopsis latreillii	43.5324	-7.02788	0	1990	100-1	online databases
Apseudopsis latreillii	43.5528	-7.02915	0	1990	114-1	online databases
Apseudopsis latreillii	43.5561	-7.02483	0	1990	153-1	online databases
Apseudopsis latreillii	43.5591	7.1433	#N/A	2015	CSIC-CEAB/ Centre for Advanced Studies of Blanes (_QUADRIGE - Coastal monitoring database and product_4250	online databases
Apseudopsis latreillii	43.5627	-7.02936	0	1990	119-1	online databases
Apseudopsis latreillii	43.6131	7.1351	#N/A	2012	fae9e2da7974c88c067860458671_60458671_247077_ffbecd45e6	online databases
Apseudopsis latreillii	43.6475	7.21944	#N/A	2012	486_114-P-059 - 29B - Apt Nice_1654	online databases
Apseudopsis latreillii	43.693	7.311	#N/A	2018	Eco laboratory geochemistry Benthic Environments _QUADRIGE - Coastal monitoring database and product_13352	online databases
Apseudopsis latreillii	43.7558	7.4948	#N/A	2015	fb81c61d60c3e4acfe7260633648_60633648_247077_ffbecd45e6	online databases
Apseudopsis latreillii	45.61	13.7425	8.5	2013	cd19c59cc5a926798fa8d8e363a4b7d66f04b885	online databases
Apseudopsis latreillii	45.7008	13.71	17	2015	144	online databases
Apseudopsis latreillii	46.2687	-1.2835	#N/A	2019	a3e4fda14408c97c62f960707371_60707371_247077_ffbecd45e6	online databases
Apseudopsis latreillii	46.6027	-1.95633	#N/A	2007	486_074-P-059 - Bretignolles Large SMF4_21273	online databases
Apseudopsis latreillii	47.032	-2.15118	#N/A	2010	486_071-P-094 - Banc de Bourgneuf SMF1_20344	online databases
Apseudopsis latreillii	47.032	-2.15118	#N/A	2014	4847ec0cb36b39e4d21d60512259_60512259_247077_ffbecd45e6	online databases
Apseudopsis latreillii	47.0481	-2.23708	#N/A	2006	4521887380352bc138ed60333608_60333608_247077_ffbecd45e6	online databases
Apseudopsis latreillii	47.1369	-2.45293	#N/A	2006	08037eaf8032b343f72560151041_60151041_247077_ffbecd45e6	online databases
Apseudopsis latreillii	47.3313	-3.13254	#N/A	2004	486_054-P-019 - Belle-Ile Maerl_53779	online databases
Apseudopsis latreillii	47.3313	-3.13253	#N/A	2016	69ee0ff913404abe4fd360633465_60633465_247077_ffbecd45e6	online databases
Apseudopsis latreillii	47.4816	-3.05637	#N/A	2021	fa31179c15e8b9f2034f60806442_60806442_247077_ffbecd45e6	online databases
Apseudopsis latreillii	47.4926	-2.83527	#N/A	2003	486_062-P-032 - Saint Gildas de Rhuys IM_14746	online databases
Apseudopsis latreillii	47.5258	-2.93448	#N/A	2019	4b51523676bf57bfa6a660748870_60748870_247077_ffbecd45e6	online databases
Apseudopsis latreillii	47.526	-2.89819	#N/A	2004	486_058-P-023 - Chenal du Crouesty Maerl_58448	online databases
Apseudopsis latreillii	47.5306	-2.87	#N/A	2004	486_058-P-020 - Kerjouanno IM_12218	online databases
Apseudopsis latreillii	47.5306	-2.86999	#N/A	2006	2083f8b3d85cab2d438360496076_60496076_247077_ffbecd45e6	online databases
Apseudopsis latreillii	47.5592	-3.12018	#N/A	2011	486_056-P-006 - Baie de Plouharnel IM_3572	online databases
Apseudopsis latreillii	47.5592	-3.12017	#N/A	2016	5019412f4e2f4666121160611248_60611248_247077_ffbecd45e6	online databases
Apseudopsis latreillii	47.5604	-2.88336	#N/A	2006	486_061-P-074 - Arzon IM_12909	online databases
Apseudopsis latreillii	47.6468	-3.28181	#N/A	2017	8235ddf7373bfeb043cb60651638_60651638_247077_ffbecd45e6	online databases
Apseudopsis latreillii	47.6468	-3.2818	#N/A	2005	486_052-P-025 - Lorient Etel SM_28567	online databases
Apseudopsis latreillii	47.693	-3.32214	#N/A	2013	486_052-P-022 - Erdeven IM_12174	online databases
Apseudopsis latreillii	47.693	-3.32214	#N/A	2005	d2d56559f7eb25ca64d860496071_60496071_247077_ffbecd45e6	online databases
Apseudopsis latreillii	47.7015	-3.32953	#N/A	2011	486_051-P-021 - Gavres IM_11679	online databases
Apseudopsis latreillii	47.7015	-3.32952	#N/A	2019	0b262bd4add585097cf260748821_60748821_247077_ffbecd45e6	online databases
Apseudopsis latreillii	47.7342	-4.01767	40	#N/A	Maerl_Diversity_Species_Inventory_UBGC_2463	online databases
Apseudopsis latreillii	47.7342	-3.96583	40	#N/A	Maerl_Diversity_Species_Inventory_UBGI_2464	online databases
Apseudopsis latreillii	47.735	-4.00032	#N/A	2015	2ac1d9265b22b5c2c31560612267_60612267_247077_ffbecd45e6	online databases
Apseudopsis latreillii	47.7918	-3.88413	#N/A	2010	4599f18074e8e9f4dd0660495567_60495567_247077_ffbecd45e6	online databases
Apseudopsis latreillii	47.8098	-3.71207	#N/A	2020	ce35faabd7a1a1b96f4460788899_60788899_247077_ffbecd45e6	online databases
Apseudopsis latreillii	47.8132	-3.70367	#N/A	2020	a26a7d5971645dbabefe60788898_60788898_247077_ffbecd45e6	online databases
Apseudopsis latreillii	47.8238	-3.95782	#N/A	2004	486_043-P-024 - Concarneau SM_27168	online databases
Apseudopsis latreillii	47.8238	-3.95782	#N/A	2004	327ab482ee9f76c46d6360289568_60289568_247077_ffbecd45e6	online databases
Apseudopsis latreillii	47.8506	-4.01099	#N/A	2005	a720a4f6e01ad3850cec60495749_60495749_247077_ffbecd45e6	online databases
Apseudopsis latreillii	47.8639	-4.3952	#N/A	2008	e1ddab0205042df6ff4860291709_60291709_247077_ffbecd45e6	online databases
Apseudopsis latreillii	47.8639	-4.3952	#N/A	2008	486_042-P-045 - Audierne SM_26826	online databases
Apseudopsis latreillii	48.2324	-4.44568	#N/A	2004	bd1eb6b6ac94671015ab60495994_60495994_247077_ffbecd45e6	online databases
Apseudopsis latreillii	48.2968	-4.58078	#N/A	2014	7ff9b2a26a927ddf23ba60612221_60612221_247077_ffbecd45e6	online databases
Apseudopsis latreillii	48.2968	-4.58078	#N/A	2010	486_039-P-208 - Camaret Maerl_47882	online databases
Apseudopsis latreillii	48.3218	-4.4105	40	#N/A	Maerl_Diversity_Species_Inventory_UBBC_2461	online databases
Apseudopsis latreillii	48.3219	-4.37117	#N/A	2009	03ffbc8af8633c51c7cc60496036_60496036_247077_ffbecd45e6	online databases
Apseudopsis latreillii	48.322	-4.37115	#N/A	2011	486_039-P-207 - Rade de Brest - Rozegat Maerl_45811	online databases
Apseudopsis latreillii	48.331	-4.37038	#N/A	2004	cf2329ec6320e40dfad260495713_60495713_247077_ffbecd45e6	online databases
Apseudopsis latreillii	48.3333	-4.45418	#N/A	2007	45380154a705731632ed60292372_60292372_247077_ffbecd45e6	online databases
Apseudopsis latreillii	48.3333	-4.45419	#N/A	2009	486_039-P-204 - Rade de Brest - Larmor SM_25305	online databases
Apseudopsis latreillii	48.3657	-4.4375	40	#N/A	Maerl_Diversity_Species_Inventory_UBBI_2462	online databases
Apseudopsis latreillii	48.3733	-4.7647	#N/A	2021	6048a93140c2a54141ff60796231_60796231_247077_ffbecd45e6	online databases
Apseudopsis latreillii	48.3868	-4.85427	#N/A	2019	fe8c6ee77cb3113c7f3d60748876_60748876_247077_ffbecd45e6	online databases
Apseudopsis latreillii	48.3868	-4.85428	#N/A	2004	486_037-P-080 - Banc des pourceaux (Molene) Maerl_41198	online databases
Apseudopsis latreillii	48.5514	-2.68656	#N/A	2016	a8742b486bab0b21927d60611269_60611269_247077_ffbecd45e6	online databases
Apseudopsis latreillii	48.5672	-2.66785	#N/A	2009	81877fdd2915356174f960292309_60292309_247077_ffbecd45e6	online databases
Apseudopsis latreillii	48.5989	-4.5666	#N/A	2006	b2452d94a7c65dfb020460495682_60495682_247077_ffbecd45e6	online databases
Apseudopsis latreillii	48.6057	-4.61237	#N/A	2006	a6fdf1d6deb348495b9460495987_60495987_247077_ffbecd45e6	online databases
Apseudopsis latreillii	48.6057	-4.61237	#N/A	2006	486_037-P-052 - Sainte-Marguerite IM_8550	online databases
Apseudopsis latreillii	48.6419	-1.65689	#N/A	2004	a983a1517f9aaa18771660495774_60495774_247077_ffbecd45e6	online databases
Apseudopsis latreillii	48.6422	-2.10889	0	2014	INV.124027	online databases
Apseudopsis latreillii	48.657	-4.27853	#N/A	2004	63930fe59571a22c679060495426_60495426_247077_ffbecd45e6	online databases
Apseudopsis latreillii	48.6781	-3.91735	#N/A	2011	a25655b9347021ca531360496253_60496253_247077_ffbecd45e6	online databases
Apseudopsis latreillii	48.7083	-3.6066	#N/A	2018	3d871f0f6d3048b0474e60695744_60695744_247077_ffbecd45e6	online databases
Apseudopsis latreillii	48.7083	-3.8662	#N/A	1998	ROSCOFFINVOCC_0009602	online databases
Apseudopsis latreillii	48.7083	-3.86618	#N/A	2012	486_033-P-047 - Pierre noire SM_15630	online databases
Apseudopsis latreillii	48.7083	-3.86617	#N/A	2008	634931c073ebfaa6d2fa60184053_60184053_247077_ffbecd45e6	online databases
Apseudopsis latreillii	48.7122	-3.9337	#N/A	2020	a3a28dc615a09e192eea60776222_60776222_247077_ffbecd45e6	online databases
Apseudopsis latreillii	48.7873	-2.87382	#N/A	2016	ae250ea8d9a9dbc69fbd60633464_60633464_247077_ffbecd45e6	online databases
Apseudopsis latreillii	48.8236	-3.01936	#N/A	2014	2769df4d8ea24113062360610591_60610591_247077_ffbecd45e6	online databases
Apseudopsis latreillii	48.8754	-1.61066	#N/A	2013	486_018-P-092 - SSMF02 - Granville SM_32530	online databases
Apseudopsis latreillii	48.876	-1.83883	#N/A	2017	7201af7ff77946ab8b5360653066_60653066_247077_ffbecd45e6	online databases
Apseudopsis latreillii	48.8812	-1.82815	#N/A	2018	0b2887bede8d7423ddce60694810_60694810_247077_ffbecd45e6	online databases
Apseudopsis latreillii	48.9095	-1.77973	#N/A	2017	29623a8de35cc25de81a60653077_60653077_247077_ffbecd45e6	online databases
Apseudopsis latreillii	48.9267	-1.80483	#N/A	2013	3a9c76bcec5f96bc193860438068_60438068_247077_ffbecd45e6	online databases
Apseudopsis latreillii	48.9267	-1.80484	#N/A	2013	486_019-P-011 - SSRF01 Maerl_59587	online databases
Apseudopsis latreillii	49.1627	-1.64998	#N/A	2014	836915f7c379deecf8cb60492070_60492070_247077_ffbecd45e6	online databases
Apseudopsis latreillii	49.335	-0.02261	#N/A	2012	486_010-P-200 - SSMF10 - Villers-sur-Mer SM_34409	online databases
Apseudopsis latreillii	49.419	-0.042167	#N/A	2019	22b5fbd961857f6aba4060759291_60759291_247077_ffbecd45e6	online databases
Apseudopsis latreillii	49.5767	-1.85397	#N/A	2010	486_017-P-030 - SSMF04 - Dielette SM_32880	online databases
Apseudopsis latreillii	49.67	-1.60932	#N/A	2016	96bc5392e54dc5e4750a60580893_60580893_247077_ffbecd45e6	online databases
Apseudopsis latreillii	49.679	-1.50508	#N/A	2011	b22b8753f5a0f6f23a7460224319_60224319_247077_ffbecd45e6	online databases
Apseudopsis latreillii	49.9038	-6.3355	15.8	1997	JNCCMNCR20734991	online databases
Apseudopsis latreillii	49.9062	-6.34422	12.9	1997	JNCCMNCR20734979	online databases
Apseudopsis latreillii	49.9062	-6.28882	0	2013	RSMP_92155_1073059	online databases
Apseudopsis latreillii	49.9069	-6.28967	36.03	2013	MRNE021100005AFD	online databases
Apseudopsis latreillii	49.9177	-6.33674	17.6	1997	JNCCMNCR20735085	online databases
Apseudopsis latreillii	49.9215	-6.33775	0	2013	RSMP_92120_1073056	online databases
Apseudopsis latreillii	49.9222	-6.3386	18.83	2013	MRNE0211000057B0	online databases
Apseudopsis latreillii	49.9239	-6.27473	#N/A	1983	JNCCMNCR10641584	online databases
Apseudopsis latreillii	49.9252	-6.33203	0	2013	RSMP_92125_1073057	online databases
Apseudopsis latreillii	49.9258	-6.33287	13.18	2013	MRNE021100005823	online databases
Apseudopsis latreillii	49.9293	-6.31548	10	1997	JNCCMNCR20734840	online databases
Apseudopsis latreillii	49.9297	-6.33239	10	1997	JNCCMNCR20735252	online databases
Apseudopsis latreillii	49.9328	-6.27753	0	2013	RSMP_92093_1073052	online databases
Apseudopsis latreillii	49.9335	-6.27839	18.39	2013	MRNE021100005435	online databases
Apseudopsis latreillii	49.9338	-6.27415	0	2009	RSMP_87292_1072969	online databases
Apseudopsis latreillii	49.9352	-6.27892	0	2013	RSMP_92087_1073049	online databases
Apseudopsis latreillii	49.9356	-6.31592	7.3	1988	JNCCMNCR10696826	online databases
Apseudopsis latreillii	49.9358	-6.27977	18.26	2013	MRNE02110000533E	online databases
Apseudopsis latreillii	49.936	-6.27559	0	2013	RSMP_92089_1073050	online databases
Apseudopsis latreillii	49.9366	-6.27644	18.76	2013	MRNE021100005360	online databases
Apseudopsis latreillii	49.9368	-6.33596	5.5	1997	JNCCMNCR20734766	online databases
Apseudopsis latreillii	49.9385	1.05759	#N/A	2013	0e4c5c0cc0ae34d3a4b560422968_60422968_247077_ffbecd45e6	online databases
Apseudopsis latreillii	49.9385	1.05759	#N/A	2013	486_008-P-063 - SSMF14 - Dieppe SM_35121	online databases
Apseudopsis latreillii	49.9398	-6.30834	6	1997	JNCCMNCR20734568	online databases
Apseudopsis latreillii	49.9399	-6.30556	5.9	1997	JNCCMNCR20735333	online databases
Apseudopsis latreillii	49.9421	-6.35518	0	2013	RSMP_92111_1073054	online databases
Apseudopsis latreillii	49.9426	-6.30427	#N/A	1983	JNCCMNCR10641737	online databases
Apseudopsis latreillii	49.9428	-6.35603	9.11	2013	MRNE02110000560C	online databases
Apseudopsis latreillii	49.9434	-6.29786	0	2013	RSMP_92105_1073053	online databases
Apseudopsis latreillii	49.9437	-6.34787	6	1997	JNCCMNCR20735291	online databases
Apseudopsis latreillii	49.944	-6.29871	7.05	2013	MRNE021100005552	online databases
Apseudopsis latreillii	49.944	-6.3426	2	1988	JNCCMNCR10754655	online databases
Apseudopsis latreillii	49.9462	-6.28615	0	2009	RSMP_87267_1072967	online databases
Apseudopsis latreillii	49.9468	-6.28701	0	2013	RSMP_92081_1073048	online databases
Apseudopsis latreillii	49.9474	-6.28787	11.35	2013	MRNE021100005265	online databases
Apseudopsis latreillii	49.9475	-6.28479	0	2009	RSMP_87285_1072968	online databases
Apseudopsis latreillii	49.9483	-6.27857	4.9	1997	JNCCMNCR20734311	online databases
Apseudopsis latreillii	49.9488	-6.34499	2.8	1997	JNCCMNCR20734705	online databases
Apseudopsis latreillii	49.949	-6.34932	2.1	1997	JNCCMNCR20734728	online databases
Apseudopsis latreillii	49.9516	-6.30633	4.4	1997	JNCCMNCR20734592	online databases
Apseudopsis latreillii	49.9541	-6.30948	#N/A	1983	JNCCMNCR10642182	online databases
Apseudopsis latreillii	49.9543	-6.29591	#N/A	2013	NATENG000110_Site_E_C7_247077	online databases
Apseudopsis latreillii	49.9551	-6.29461	#N/A	2000	MRNE01340000050F	online databases
Apseudopsis latreillii	49.9553	-6.25882	4	1997	JNCCMNCR20734133	online databases
Apseudopsis latreillii	49.9563	-6.3029	0	2013	RSMP_92163_1073060	online databases
Apseudopsis latreillii	49.9564	-6.27203	#N/A	1983	JNCCMNCR10641525	online databases
Apseudopsis latreillii	49.9569	-6.30375	5.5	2013	MRNE021100005CC3	online databases
Apseudopsis latreillii	49.9573	-6.3099	3.8	1997	JNCCMNCR20734657	online databases
Apseudopsis latreillii	49.9578	-6.30618	5	1997	JNCCMNCR20735213	online databases
Apseudopsis latreillii	49.9597	-6.32812	#N/A	1983	JNCCMNCR10642081	online databases
Apseudopsis latreillii	49.9607	-6.34926	12.5	1988	JNCCMNCR10692000	online databases
Apseudopsis latreillii	49.9615	-6.29578	#N/A	2013	NATENG000110_Site_A_C5_247077	online databases
Apseudopsis latreillii	49.962	-6.29501	#N/A	2000	MRNE013400000322	online databases
Apseudopsis latreillii	49.9658	-6.31388	1.7	1997	JNCCMNCR20734525	online databases
Apseudopsis latreillii	49.9663	-6.30529	0	2013	RSMP_92168_1073065	online databases
Apseudopsis latreillii	49.9663	-6.31998	0	2013	RSMP_92165_1073062	online databases
Apseudopsis latreillii	49.9669	-6.30614	12.21	2013	MRNE021100005DC5	online databases
Apseudopsis latreillii	49.9669	-6.32083	6.09	2013	MRNE021100005D12	online databases
Apseudopsis latreillii	49.9671	-6.32459	#N/A	1983	JNCCMNCR10641794	online databases
Apseudopsis latreillii	49.9696	-6.28004	17.2	1997	JNCCMNCR20734444	online databases
Apseudopsis latreillii	49.9715	-6.28034	22.9	1997	JNCCMNCR20734424	online databases
Apseudopsis latreillii	49.972	-6.27915	0	2013	RSMP_92064_1073046	online databases
Apseudopsis latreillii	49.9721	-6.27699	0	2009	RSMP_87263_1072965	online databases
Apseudopsis latreillii	49.9726	-6.28001	23.11	2013	MRNE021100005018	online databases
Apseudopsis latreillii	49.9732	-6.27738	0	2013	RSMP_92067_1073047	online databases
Apseudopsis latreillii	49.9738	-6.27823	25.11	2013	MRNE0211000050D3	online databases
Apseudopsis latreillii	49.9739	-6.28097	27.3	1988	JNCCMNCR10693958	online databases
Apseudopsis latreillii	50.0866	-5.09222	#N/A	1987	JNCCMNCR10663904	online databases
Apseudopsis latreillii	50.0936	-5.03965	0	2013	RSMP_91994_1073027	online databases
Apseudopsis latreillii	50.0937	-5.09665	#N/A	2016	MRNE015400007C0C	online databases
Apseudopsis latreillii	50.0937	-5.09547	#N/A	1987	JNCCMNCR10663376	online databases
Apseudopsis latreillii	50.095	-5.09571	13.1	2013	MRNE01080000D590	online databases
Apseudopsis latreillii	50.0953	-5.03773	0	2013	RSMP_91995_1073028	online databases
Apseudopsis latreillii	50.0958	-5.09283	0	2010	RSMP_87617_1072989	online databases
Apseudopsis latreillii	50.0958	-5.14505	#N/A	2016	MRNE015400008084	online databases
Apseudopsis latreillii	50.0958	-5.0976	0	2010	RSMP_87620_1072992	online databases
Apseudopsis latreillii	50.0961	-5.09869	11.8	2013	MRNE01080000D5C1	online databases
Apseudopsis latreillii	50.0962	-5.09868	9.2	2010	MRNE01080000C9F5	online databases
Apseudopsis latreillii	50.0962	-5.09349	13.6	2013	MRNE01080000D507	online databases
Apseudopsis latreillii	50.0962	-5.10933	#N/A	2016	MRNE015400007D2A	online databases
Apseudopsis latreillii	50.0962	-5.09376	10.3	2010	MRNE01080000CC37	online databases
Apseudopsis latreillii	50.0964	-5.09285	#N/A	1987	JNCCMNCR10663863	online databases
Apseudopsis latreillii	50.0966	-5.12083	#N/A	1987	JNCCMNCR10663826	online databases
Apseudopsis latreillii	50.0967	-5.09595	12.9	2013	MRNE01080000D610	online databases
Apseudopsis latreillii	50.0967	-5.09163	0	2010	RSMP_87635_1072993	online databases
Apseudopsis latreillii	50.0972	-5.13918	#N/A	2016	MRNE015400007F66	online databases
Apseudopsis latreillii	50.0972	-5.0925	10.4	2010	MRNE01080000CBF4	online databases
Apseudopsis latreillii	50.0973	-5.12648	#N/A	1987	JNCCMNCR10663539	online databases
Apseudopsis latreillii	50.0974	-5.12369	#N/A	1987	JNCCMNCR10663786	online databases
Apseudopsis latreillii	50.0975	-5.13907	#N/A	1987	JNCCMNCR10663624	online databases
Apseudopsis latreillii	50.0978	-5.09582	12.5	2013	MRNE01080000D549	online databases
Apseudopsis latreillii	50.1176	-5.02658	0	2013	RSMP_92008_1073033	online databases
Apseudopsis latreillii	50.118	-5.02178	0	2013	RSMP_92000_1073031	online databases
Apseudopsis latreillii	50.1187	-5.02756	0	2013	RSMP_91998_1073029	online databases
Apseudopsis latreillii	50.1428	-5.01728	0	2013	RSMP_92031_1073042	online databases
Apseudopsis latreillii	50.1447	-5.02269	0	2013	RSMP_92034_1073043	online databases
Apseudopsis latreillii	50.1524	-5.01666	#N/A	1990	JNCCMNCR10669408	online databases
Apseudopsis latreillii	50.1534	-5.04753	#N/A	1990	JNCCMNCR10670926	online databases
Apseudopsis latreillii	50.1536	-5.00553	#N/A	1990	JNCCMNCR10669144	online databases
Apseudopsis latreillii	50.1548	-5.02941	#N/A	1990	JNCCMNCR10670090	online databases
Apseudopsis latreillii	50.1575	-5.04471	#N/A	2013	Fal_Core_week0_infauna_60_5_Max239	online databases
Apseudopsis latreillii	50.1582	-5.04596	#N/A	2013	Fal_Core_week5_infauna_02_2_Max239	online databases
Apseudopsis latreillii	50.1587	-5.05611	5.4	2013	MRNE01080000D829	online databases
Apseudopsis latreillii	50.159	-5.05158	5.4	2013	MRNE01080000D76B	online databases
Apseudopsis latreillii	50.1598	-5.05408	5.4	2013	MRNE01080000D70F	online databases
Apseudopsis latreillii	50.1629	-5.02992	#N/A	1985	JNCCMNCR10682914	online databases
Apseudopsis latreillii	50.1654	-5.00067	#N/A	1990	JNCCMNCR10671309	online databases
Apseudopsis latreillii	50.1687	-5.0471	#N/A	1985	JNCCMNCR10687459	online databases
Apseudopsis latreillii	50.1733	-5.03206	0	2010	RSMP_87578_1072974	online databases
Apseudopsis latreillii	50.1736	-5.03222	0	2013	RSMP_92029_1073040	online databases
Apseudopsis latreillii	50.1737	-5.03312	5.6	2010	MRNE01080000C18B	online databases
Apseudopsis latreillii	50.1758	-5.03292	0	2010	RSMP_87590_1072982	online databases
Apseudopsis latreillii	50.1763	-5.03405	6.8	2010	MRNE01080000C24A	online databases
Apseudopsis latreillii	50.1763	-5.03393	6	2010	MRNE01080000C3F9	online databases
Apseudopsis latreillii	50.1764	-5.03397	5.9	2010	MRNE01080000C38F	online databases
Apseudopsis latreillii	50.1764	-5.03414	6.3	2010	MRNE01080000C29E	online databases
Apseudopsis latreillii	50.1765	-5.03543	0	2010	RSMP_87596_1072988	online databases
Apseudopsis latreillii	50.1767	-5.03251	0	2010	RSMP_87579_1072975	online databases
Apseudopsis latreillii	50.177	-5.03651	4.3	2010	MRNE01080000C524	online databases
Apseudopsis latreillii	50.1772	-5.03375	4.1	2010	MRNE01080000C1ED	online databases
Apseudopsis latreillii	50.1772	-5.03629	4.7	2013	MRNE01080000D154	online databases
Apseudopsis latreillii	50.1773	-5.04176	5	2010	MRNE01080000BDEB	online databases
Apseudopsis latreillii	50.1774	-5.03363	4.9	2013	MRNE01080000D2FE	online databases
Apseudopsis latreillii	50.1779	-5.03416	0	2010	RSMP_87594_1072986	online databases
Apseudopsis latreillii	50.1779	-5.03086	0	2010	RSMP_87591_1072983	online databases
Apseudopsis latreillii	50.1783	-5.03183	5.5	2013	MRNE01080000D381	online databases
Apseudopsis latreillii	50.1784	-5.03542	4.1	2010	MRNE01080000C4CA	online databases
Apseudopsis latreillii	50.1785	-5.03196	5.6	2010	MRNE01080000C46A	online databases
Apseudopsis latreillii	50.1802	-5.03421	#N/A	2016	MRNE01540000874F	online databases
Apseudopsis latreillii	50.1812	-5.0429	0	2010	RSMP_84300_1072961	online databases
Apseudopsis latreillii	50.1813	-5.04281	#N/A	2009	MRNE01080000E56C	online databases
Apseudopsis latreillii	50.1813	-5.04281	0	2009	RSMP_83029_1072958	online databases
Apseudopsis latreillii	50.1813	-5.04511	0	2013	RSMP_91558_1073021	online databases
Apseudopsis latreillii	50.1818	-5.04399	4.9	2010	MRNE01080000BA4C	online databases
Apseudopsis latreillii	50.1818	-5.04618	4.7	2013	MRNE01080000DBCD	online databases
Apseudopsis latreillii	50.1826	-5.0351	0	2010	RSMP_84301_1072962	online databases
Apseudopsis latreillii	50.1827	-5.03494	0	2013	RSMP_91559_1073022	online databases
Apseudopsis latreillii	50.1827	-5.03512	#N/A	2009	MRNE01080000E582	online databases
Apseudopsis latreillii	50.1831	-5.02791	0	2009	RSMP_83031_1072960	online databases
Apseudopsis latreillii	50.1831	-5.02798	0	2013	RSMP_91560_1073023	online databases
Apseudopsis latreillii	50.1832	-5.03619	3.6	2010	MRNE01080000BAAB	online databases
Apseudopsis latreillii	50.1832	-5.03603	4.6	2013	MRNE01080000DC3B	online databases
Apseudopsis latreillii	50.1837	-5.02907	8.2	2013	MRNE01080000DCA8	online databases
Apseudopsis latreillii	50.185	-5.04362	0	2013	RSMP_92020_1073036	online databases
Apseudopsis latreillii	50.1855	-5.04471	5.9	2013	MRNE01080000CFFF	online databases
Apseudopsis latreillii	50.1865	-5.04743	0	2013	RSMP_92022_1073038	online databases
Apseudopsis latreillii	50.1865	-5.03225	0	2010	RSMP_84305_1072963	online databases
Apseudopsis latreillii	50.1866	-5.03185	0	2013	RSMP_91561_1073024	online databases
Apseudopsis latreillii	50.1868	-5.03001	#N/A	2016	MRNE015400008D21	online databases
Apseudopsis latreillii	50.1868	-5.04392	0	2013	RSMP_92021_1073037	online databases
Apseudopsis latreillii	50.1871	-5.03334	5.8	2010	MRNE01080000BBAD	online databases
Apseudopsis latreillii	50.1871	-5.03294	4.8	2013	MRNE01080000DD11	online databases
Apseudopsis latreillii	50.1874	-5.04501	4.8	2013	MRNE01080000D058	online databases
Apseudopsis latreillii	50.1933	-5.0316	#N/A	2016	MRNE0154000092F3	online databases
Apseudopsis latreillii	50.1955	-5.03205	0	2013	RSMP_92019_1073035	online databases
Apseudopsis latreillii	50.1961	-5.037	0	2013	RSMP_92018_1073034	online databases
Apseudopsis latreillii	50.1974	-5.03619	0	2010	RSMP_84314_1072964	online databases
Apseudopsis latreillii	50.2071	-5.02912	#N/A	2016	MRNE015400009D6D	online databases
Apseudopsis latreillii	50.2247	-3.78037	#N/A	1985	JNCCMNCR10686500	online databases
Apseudopsis latreillii	50.2302	-3.77384	#N/A	1985	JNCCMNCR10687117	online databases
Apseudopsis latreillii	50.2317	-3.76953	#N/A	2014	MRNE015400003618	online databases
Apseudopsis latreillii	50.2321	-3.77223	#N/A	1990	JNCCMNCR10673574	online databases
Apseudopsis latreillii	50.2357	-3.76773	#N/A	1985	JNCCMNCR10687018	online databases
Apseudopsis latreillii	50.2371	-3.76335	#N/A	2014	MRNE01540000406C	online databases
Apseudopsis latreillii	50.2381	-3.76067	#N/A	1985	JNCCMNCR10686889	online databases
Apseudopsis latreillii	50.2387	-3.7592	#N/A	2014	MRNE01540000398A	online databases
Apseudopsis latreillii	50.2397	-3.75689	#N/A	2014	MRNE015400003A19	online databases
Apseudopsis latreillii	50.2415	-3.75822	#N/A	2014	MRNE015400003FE5	online databases
Apseudopsis latreillii	50.2423	-3.76139	#N/A	1985	JNCCMNCR10686821	online databases
Apseudopsis latreillii	50.2431	-3.75861	#N/A	1990	JNCCMNCR10673346	online databases
Apseudopsis latreillii	50.2437	-3.76116	#N/A	1985	JNCCMNCR10686734	online databases
Apseudopsis latreillii	50.247	-3.75741	#N/A	2014	MRNE015400012EA8	online databases
Apseudopsis latreillii	50.2491	-3.75891	#N/A	2014	MRNE015400003ACA	online databases
Apseudopsis latreillii	50.2492	-3.76038	#N/A	1985	JNCCMNCR10686671	online databases
Apseudopsis latreillii	50.2494	-3.75744	#N/A	1990	JNCCMNCR10673123	online databases
Apseudopsis latreillii	50.2494	-3.7578	#N/A	2014	MRNE015400003B68	online databases
Apseudopsis latreillii	50.2504	-3.75865	#N/A	2014	MRNE015400003C41	online databases
Apseudopsis latreillii	50.2528	-3.76116	#N/A	2014	MRNE015400003CFE	online databases
Apseudopsis latreillii	50.2529	-3.76248	#N/A	1985	JNCCMNCR10686594	online databases
Apseudopsis latreillii	50.3093	-4.1604	#N/A	2011	MRNE01080000EDB8	online databases
Apseudopsis latreillii	50.3094	-4.16252	#N/A	2011	MRNE01080000ED7B	online databases
Apseudopsis latreillii	50.3095	-4.06541	#N/A	2017	MRNE013700005BFF	online databases
Apseudopsis latreillii	50.3101	-4.07441	0	2011	RSMP_88011_1073012	online databases
Apseudopsis latreillii	50.3101	-4.0744	#N/A	2011	MRNE01080000EE3A	online databases
Apseudopsis latreillii	50.3116	-4.06494	#N/A	1999	JNCCMNCR20747946	online databases
Apseudopsis latreillii	50.3118	-4.06607	#N/A	1999	JNCCMNCR20747904	online databases
Apseudopsis latreillii	50.3118	-4.06254	0	2011	RSMP_88013_1073014	online databases
Apseudopsis latreillii	50.3118	-4.06253	#N/A	2011	MRNE01080000EE8C	online databases
Apseudopsis latreillii	50.3122	-4.06371	#N/A	1999	JNCCMNCR20747761	online databases
Apseudopsis latreillii	50.3124	-4.05978	#N/A	1999	JNCCMNCR20747856	online databases
Apseudopsis latreillii	50.3148	-4.05483	#N/A	2017	MRNE013700005B21	online databases
Apseudopsis latreillii	50.3259	-4.15366	#N/A	2011	MRNE01080000F40E	online databases
Apseudopsis latreillii	50.329	-4.17965	#N/A	1999	JNCCMNCR20747327	online databases
Apseudopsis latreillii	50.3339	-4.61777	#N/A	1986	JNCCMNCR10687701	online databases
Apseudopsis latreillii	50.3395	-4.64141	#N/A	1986	JNCCMNCR10687807	online databases
Apseudopsis latreillii	50.3401	-4.43309	#N/A	2015	MRNE0154000130C7	online databases
Apseudopsis latreillii	50.3411	-4.64164	#N/A	1986	JNCCMNCR10687770	online databases
Apseudopsis latreillii	50.343	-4.63613	#N/A	1986	JNCCMNCR10687741	online databases
Apseudopsis latreillii	50.3483	-4.14317	0	2011	RSMP_88047_1073018	online databases
Apseudopsis latreillii	50.3484	-4.14318	#N/A	2011	MRNE01080000F298	online databases
Apseudopsis latreillii	50.349	-4.12919	0	2007	RSMP_75573_1072956	online databases
Apseudopsis latreillii	50.352	-4.14898	#N/A	2011	MRNE01080000EC34	online databases
Apseudopsis latreillii	50.3532	-4.14541	0	2011	RSMP_87537_1072970	online databases
Apseudopsis latreillii	50.3533	-4.14515	#N/A	2011	MRNE01080000E76C	online databases
Apseudopsis latreillii	50.3533	-4.43278	#N/A	2015	MRNE0154000130FD	online databases
Apseudopsis latreillii	50.3536	-4.62307	#N/A	1991	JNCCMNCR10672325	online databases
Apseudopsis latreillii	50.3537	-4.14524	0	2007	RSMP_75576_1072957	online databases
Apseudopsis latreillii	50.3612	-4.18337	#N/A	1999	JNCCMNCR20746698	online databases
Apseudopsis latreillii	50.3627	-4.18668	#N/A	1999	JNCCMNCR20746791	online databases
Apseudopsis latreillii	50.3634	-4.18812	#N/A	1999	JNCCMNCR20746974	online databases
Apseudopsis latreillii	50.364	-4.18252	#N/A	1999	JNCCMNCR20746885	online databases
Apseudopsis latreillii	50.3645	-4.11969	#N/A	1999	JNCCMNCR20746630	online databases
Apseudopsis latreillii	50.3651	-4.19072	0	2011	RSMP_88021_1073016	online databases
Apseudopsis latreillii	50.3651	-4.19071	#N/A	2011	MRNE01080000F021	online databases
Apseudopsis latreillii	50.3654	-4.18596	#N/A	1999	JNCCMNCR20746550	online databases
Apseudopsis latreillii	50.3657	-4.19188	#N/A	1999	JNCCMNCR20746271	online databases
Apseudopsis latreillii	50.3661	-4.18866	#N/A	1999	JNCCMNCR20746456	online databases
Apseudopsis latreillii	50.3663	-4.18741	#N/A	1999	JNCCMNCR20746353	online databases
Apseudopsis latreillii	50.381	-4.19003	#N/A	1994	MRMLN00400010872	online databases
Apseudopsis latreillii	50.3844	-4.18996	0	2011	RSMP_87981_1073005	online databases
Apseudopsis latreillii	50.391	-4.23249	0	2011	RSMP_87966_1072998	online databases
Apseudopsis latreillii	50.3919	-4.22571	0	2011	RSMP_87968_1073000	online databases
Apseudopsis latreillii	50.3937	-4.22363	#N/A	2015	MRNE015400014590	online databases
Apseudopsis latreillii	50.395	-4.21642	0	2011	RSMP_87973_1073003	online databases
Apseudopsis latreillii	50.395	-4.2164	#N/A	2011	MRNE01080000E9E4	online databases
Apseudopsis latreillii	50.5619	0.96519	41	2013	RSMP_BSSS038_882991	online databases
Apseudopsis latreillii	50.5706	0.96774	30	2013	RSMP_BSSS044_882992	online databases
Apseudopsis latreillii	50.5854	-2.4802	#N/A	1995	JNCCMNCR20706636	online databases
Apseudopsis latreillii	50.5889	-2.45467	#N/A	1995	JNCCMNCR20706449	online databases
Apseudopsis latreillii	50.6331	-0.90079	21.3	2008	RSMP_WGL3510808_001B_882990	online databases
Apseudopsis latreillii	50.6403	-1.92428	#N/A	1995	MRMLN00400005F0A	online databases
Apseudopsis latreillii	50.6867	-1.54782	6.7	2014	MRNE01080002F045	online databases
Apseudopsis latreillii	50.6934	-1.89297	12.31	2013	RSMP_MPAPLRC2013#153#PLRC038#26850_1073067	online databases
Apseudopsis latreillii	50.6934	-1.89296	12	2013	MRNE0108000107FB	online databases
Apseudopsis latreillii	50.7084	-1.54634	0	2011	RSMP_87544_1072971	online databases
Apseudopsis latreillii	50.7294	-1.53889	#N/A	2019	MRNE01370000606F	online databases
Apseudopsis latreillii	50.7624	-1.41136	0	2011	RSMP_87545_1072972	online databases
Apseudopsis latreillii	50.766	-1.40604	0	2011	RSMP_88651_1073019	online databases
Apseudopsis latreillii	50.78	-1.35213	0	2013	RSMP_91916_1073026	online databases
Apseudopsis latreillii	50.7806	-1.35357	3.5	2013	MRNE021100003EFC	online databases
Apseudopsis latreillii	51.0292	1.32878	#N/A	2014	MRNE014100005763	online databases
Apseudopsis latreillii	51.0474	1.28753	#N/A	2014	MRNE014100005AFD	online databases
Apseudopsis latreillii	51.0562	1.26438	22.78	2014	RSMP_MPAFKPM2014#279A1#GT060#26696_1073066	online databases
Apseudopsis latreillii	51.1607	-4.65144	#N/A	1978	JNCCMNCR10642291	online databases
Apseudopsis latreillii	51.306	2.598	#N/A	2011	6479789A-EA03-40B0-AB05-1382040D2B01	online databases
Apseudopsis latreillii	51.309	2.602	#N/A	2010	E1F34648-5923-4844-8790-6958E02362E8	online databases
Apseudopsis latreillii	51.6891	-5.112	#N/A	1996	MRCCW10000065553	online databases
Apseudopsis latreillii	51.7212	-5.22644	#N/A	1996	MRCCW10000065768	online databases
Apseudopsis latreillii	51.7381	-5.24604	#N/A	1996	MRCCW10000065841	online databases
Apseudopsis latreillii	51.9376	-5.21052	#N/A	1996	MRCCW10000066067	online databases
Apseudopsis latreillii	51.9487	-5.15746	#N/A	1996	MRCCW10000066228	online databases
Apseudopsis latreillii	51.9617	-5.12678	#N/A	1996	MRCCW10000066302	online databases
Apseudopsis latreillii	52.0764	1.66984	20	2011	RSMP_EOWF CRC2011_24_882993	online databases
Apseudopsis latreillii	52.0853	1.70047	20.7	2011	RSMP_EOWF CRC2011_25_882994	online databases
Apseudopsis latreillii	52.82	-4.41	0	2010	RSMP_MRCCW30000002A32_1073071	online databases
Apseudopsis latreillii	52.8289	-4.4147	0	2010	RSMP_87914_1072996	online databases
Apseudopsis latreillii	52.8295	-4.41701	#N/A	2010	MRCCW30000010A2D	online databases
Apseudopsis latreillii	52.8297	-4.4173	#N/A	2010	MRCCW30000010BC3	online databases
Apseudopsis latreillii	60.9745	2.9983	295	1998	#N/A	online databases
Apseudopsis latreillii	60.975	3	295	1998	1479831	online databases
Apseudopsis latreillii	60.9915	3.63231	356	1998	#N/A	online databases
Apseudopsis latreillii	60.992	3.634	356	1998	1479830	online databases
Apseudopsis latreillii	55.4697	-1.57474	#N/A	#N/A	#N/A	Norman and Stebbing, 1886
Apseudopsis latreillii	40.8359	14.2579	#N/A	#N/A	#N/A	Norman and Stebbing, 1886
Apseudopsis latreillii	37.0848	-8.68815	#N/A	#N/A	#N/A	Alves et al., 2003
Apseudopsis latreillii	40.4051	26.6666	#N/A	#N/A	#N/A	Ates et al., 2014; Aktan and Aysel, 2013
Apseudopsis latreillii	40.3493	26.6844	#N/A	#N/A	#N/A	Ates et al., 2014
Apseudopsis latreillii	40.1522	26.4003	#N/A	#N/A	#N/A	Ates et al., 2014
Apseudopsis latreillii	40.175	26.3704	#N/A	#N/A	#N/A	Ates et al., 2014
Apseudopsis latreillii	40.1626	26.3754	#N/A	#N/A	#N/A	Ates et al., 2014
Apseudopsis latreillii	40.1573	26.3782	#N/A	#N/A	#N/A	Ates et al., 2014
Apseudopsis latreillii	40.1064	26.394	#N/A	#N/A	#N/A	Ates et al., 2014
Apseudopsis latreillii	40.0788	26.3548	#N/A	#N/A	#N/A	Ates et al., 2014
Apseudopsis latreillii	36.6544	2.69684	#N/A	#N/A	#N/A	Bakalem et al., 2009
Apseudopsis latreillii	49.9197	-6.30933	#N/A	#N/A	#N/A	Bamber, 2011
Apseudopsis latreillii	49.9773	-6.29291	#N/A	#N/A	#N/A	Bamber, 2011
Apseudopsis latreillii	49.9313	-6.28756	#N/A	#N/A	#N/A	Bamber, 2011
Apseudopsis latreillii	49.9542	-6.295	#N/A	#N/A	#N/A	Bamber, 2011
Apseudopsis latreillii	49.9628	-6.306	#N/A	#N/A	#N/A	Bamber, 2011
Apseudopsis latreillii	49.9077	-6.4515	#N/A	#N/A	#N/A	Bamber, 2011
Apseudopsis latreillii	49.8947	-6.35083	#N/A	#N/A	#N/A	Bamber, 2011
Apseudopsis latreillii	49.9577	-6.29017	#N/A	#N/A	#N/A	Bamber, 2011
Apseudopsis latreillii	49.924	-6.27467	#N/A	#N/A	#N/A	Bamber, 2011
Apseudopsis latreillii	49.9355	-6.3495	#N/A	#N/A	#N/A	Bamber, 2011
Apseudopsis latreillii	49.9433	-6.33833	#N/A	#N/A	#N/A	Bamber, 2011
Apseudopsis latreillii	49.96	-6.34833	#N/A	#N/A	#N/A	Bamber, 2011
Apseudopsis latreillii	49.9733	-6.28	#N/A	#N/A	#N/A	Bamber, 2011
Apseudopsis latreillii	49.935	-6.315	#N/A	#N/A	#N/A	Bamber, 2011
Apseudopsis latreillii	49.9038	-6.33533	#N/A	#N/A	#N/A	Bamber, 2011
Apseudopsis latreillii	49.9613	-6.29433	#N/A	#N/A	#N/A	Bamber, 2011
Apseudopsis latreillii	49.9082	-6.301	#N/A	#N/A	#N/A	Bamber, 2011
Apseudopsis latreillii	49.9572	-6.30983	#N/A	#N/A	#N/A	Bamber, 2011
Apseudopsis latreillii	49.9051	-6.30125	#N/A	#N/A	#N/A	Bamber, 2011
Apseudopsis latreillii	49.9537	-6.33998	#N/A	#N/A	#N/A	Bamber, 2011
Apseudopsis latreillii	49.6471	-1.61121	#N/A	#N/A	#N/A	Baux et al., 2017
Apseudopsis latreillii	42.315	-8.62767	#N/A	#N/A	#N/A	Cacabelos et al., 2009 and 2010
Apseudopsis latreillii	36.7433	-4.02174	#N/A	#N/A	#N/A	Chícharo et al., 2002
Apseudopsis latreillii	39.892	8.52721	#N/A	#N/A	#N/A	Como et al., 2008
Apseudopsis latreillii	37.0186	-8.00294	#N/A	#N/A	#N/A	Cruz et al., 2003
Apseudopsis latreillii	40.7101	0.867403	#N/A	#N/A	#N/A	De Juan et al., 2007; De Juan and Cartes, 2011
Apseudopsis latreillii	42.4867	-8.84028	#N/A	#N/A	#N/A	Esquete at al., 2012
Apseudopsis latreillii	42.4792	-8.84583	#N/A	#N/A	#N/A	Esquete at al., 2012
Apseudopsis latreillii	42.4958	-8.8375	#N/A	#N/A	#N/A	Esquete at al., 2012
Apseudopsis latreillii	42.4708	-8.84583	#N/A	#N/A	#N/A	Esquete at al., 2012
Apseudopsis latreillii	49.9592	-6.296	#N/A	#N/A	#N/A	Esquete at al., 2012
Apseudopsis latreillii	42.4986	-8.86465	#N/A	#N/A	#N/A	Esquete et al., 2012
Apseudopsis latreillii	45.4951	13.5438	1	#N/A	#N/A	Fiser, 2004
Apseudopsis latreillii	45.4896	13.5622	2.5	#N/A	#N/A	Fiser, 2004
Apseudopsis latreillii	45.4953	13.5544	15	#N/A	#N/A	Fiser, 2004
Apseudopsis latreillii	37.0186	-8.00343	#N/A	#N/A	#N/A	Gamito, 2008
Apseudopsis latreillii	36.7371	-3.77731	#N/A	#N/A	#N/A	García-Herrero et al., 2017
Apseudopsis latreillii	37.1301	-8.6761	#N/A	#N/A	#N/A	García-Herrero et al., 2021
Apseudopsis latreillii	36.1283	-5.4184	5	#N/A	#N/A	García-Herrero et al., 2021
Apseudopsis latreillii	36.1682	-5.3814	4	#N/A	#N/A	García-Herrero et al., 2021
Apseudopsis latreillii	36.1682	-5.3814	0	#N/A	#N/A	García-Herrero et al., 2021
Apseudopsis latreillii	36.1682	-5.3814	3	#N/A	#N/A	García-Herrero et al., 2021
Apseudopsis latreillii	36.1682	-5.3814	11	#N/A	#N/A	García-Herrero et al., 2021
Apseudopsis latreillii	36.1682	-5.3814	6	#N/A	#N/A	García-Herrero et al., 2021
Apseudopsis latreillii	36.179	-5.3894	13	#N/A	#N/A	García-Herrero et al., 2021
Apseudopsis latreillii	36.0921	-5.4385	11	#N/A	#N/A	García-Herrero et al., 2021
Apseudopsis latreillii	36.1534	-5.3581	4	#N/A	#N/A	García-Herrero et al., 2021
Apseudopsis latreillii	36.1534	-5.3581	3	#N/A	#N/A	García-Herrero et al., 2021
Apseudopsis latreillii	36.164	-5.3666	5	#N/A	#N/A	García-Herrero et al., 2021
Apseudopsis latreillii	36.164	-5.3666	6	#N/A	#N/A	García-Herrero et al., 2021
Apseudopsis latreillii	36.1567	-5.4399	4	#N/A	#N/A	García-Herrero et al., 2021
Apseudopsis latreillii	36.1567	-5.4399	8	#N/A	#N/A	García-Herrero et al., 2021
Apseudopsis latreillii	36.167	-5.433	0	#N/A	#N/A	García-Herrero et al., 2021
Apseudopsis latreillii	36.0759	-5.4246	10	#N/A	#N/A	García-Herrero et al., 2021
Apseudopsis latreillii	41.4787	2.3583	5	#N/A	#N/A	García-Herrero et al., 2021
Apseudopsis latreillii	41.4787	2.3583	20	#N/A	#N/A	García-Herrero et al., 2021
Apseudopsis latreillii	41.5294	2.461	10	#N/A	#N/A	García-Herrero et al., 2021
Apseudopsis latreillii	41.5294	2.461	20	#N/A	#N/A	García-Herrero et al., 2021
Apseudopsis latreillii	41.4644	2.2906	10	#N/A	#N/A	García-Herrero et al., 2021
Apseudopsis latreillii	41.4644	2.2906	15	#N/A	#N/A	García-Herrero et al., 2021
Apseudopsis latreillii	41.4644	2.2906	25	#N/A	#N/A	García-Herrero et al., 2021
Apseudopsis latreillii	41.5515	2.4987	20	#N/A	#N/A	García-Herrero et al., 2021
Apseudopsis latreillii	41.5594	2.5288	15	#N/A	#N/A	García-Herrero et al., 2021
Apseudopsis latreillii	41.5594	2.5288	10	#N/A	#N/A	García-Herrero et al., 2021
Apseudopsis latreillii	41.5594	2.5288	30	#N/A	#N/A	García-Herrero et al., 2021
Apseudopsis latreillii	41.5594	2.5288	25	#N/A	#N/A	García-Herrero et al., 2021
Apseudopsis latreillii	41.5594	2.5288	16	#N/A	#N/A	García-Herrero et al., 2021
Apseudopsis latreillii	30.0619	-16.3056	#N/A	#N/A	#N/A	García-Herrero et al., 2021
Apseudopsis latreillii	43.4369	-8.325	44	#N/A	#N/A	García-Herrero et al., 2021
Apseudopsis latreillii	43.4125	-8.3086	35.5	#N/A	#N/A	García-Herrero et al., 2021
Apseudopsis latreillii	43.435	-8.2919	11	#N/A	#N/A	García-Herrero et al., 2021
Apseudopsis latreillii	43.3961	-8.2919	16	#N/A	#N/A	García-Herrero et al., 2021
Apseudopsis latreillii	43.388	-8.2756	13	#N/A	#N/A	García-Herrero et al., 2021
Apseudopsis latreillii	43.4133	-8.2583	16	#N/A	#N/A	García-Herrero et al., 2021
Apseudopsis latreillii	43.4044	-8.2597	15	#N/A	#N/A	García-Herrero et al., 2021
Apseudopsis latreillii	43.3886	-8.2586	13	#N/A	#N/A	García-Herrero et al., 2021
Apseudopsis latreillii	43.3794	-8.2553	10	#N/A	#N/A	García-Herrero et al., 2021
Apseudopsis latreillii	43.371	-8.2547	8	#N/A	#N/A	García-Herrero et al., 2021
Apseudopsis latreillii	43.4127	-8.2483	13	#N/A	#N/A	García-Herrero et al., 2021
Apseudopsis latreillii	43.3708	-8.2475	8.5	#N/A	#N/A	García-Herrero et al., 2021
Apseudopsis latreillii	43.3625	-8.2483	5.5	#N/A	#N/A	García-Herrero et al., 2021
Apseudopsis latreillii	43.3536	-8.2372	2.5	#N/A	#N/A	García-Herrero et al., 2021
Apseudopsis latreillii	43.371	-8.2244	9	#N/A	#N/A	García-Herrero et al., 2021
Apseudopsis latreillii	43.4119	-8.2094	6.5	#N/A	#N/A	García-Herrero et al., 2021
Apseudopsis latreillii	43.4125	-8.25	13	#N/A	#N/A	García-Herrero et al., 2021
Apseudopsis latreillii	43.4177	-8.168	8.5	#N/A	#N/A	García-Herrero et al., 2021
Apseudopsis latreillii	43.3652	-8.2319	5	#N/A	#N/A	García-Herrero et al., 2021
Apseudopsis latreillii	28.1406	-16.4394	9	#N/A	#N/A	García-Herrero et al., 2021
Apseudopsis latreillii	28.8581	-13.8031	10	#N/A	#N/A	García-Herrero et al., 2021
Apseudopsis latreillii	28.2992	-13.5006	15	#N/A	#N/A	García-Herrero et al., 2021
Apseudopsis latreillii	40.659	-8.707	#N/A	#N/A	#N/A	García-Herrero et al., 2021
Apseudopsis latreillii	37	-8.6526	7	#N/A	#N/A	García-Herrero et al., 2021
Apseudopsis latreillii	37.0697	-8.1346	7	#N/A	#N/A	García-Herrero et al., 2021
Apseudopsis latreillii	43.4337	-3.7904	0	#N/A	#N/A	García-Herrero et al., 2021
Apseudopsis latreillii	37.6006	-0.7362	10	#N/A	#N/A	García-Herrero et al., 2021
Apseudopsis latreillii	40.6184	0.7265	1	#N/A	#N/A	García-Herrero et al., 2021
Apseudopsis latreillii	37.0905	-8.1835	0	#N/A	#N/A	García-Herrero et al., 2021
Apseudopsis latreillii	37.4001	-1.5708	5	#N/A	#N/A	García-Herrero et al., 2021
Apseudopsis latreillii	43.49	-7.02	0	#N/A	#N/A	García-Herrero et al., 2021
Apseudopsis latreillii	43.51	-7.02	0	#N/A	#N/A	García-Herrero et al., 2021
Apseudopsis latreillii	43.45	-7.03	0	#N/A	#N/A	García-Herrero et al., 2021
Apseudopsis latreillii	43.5	-7.03	0	#N/A	#N/A	García-Herrero et al., 2021
Apseudopsis latreillii	43.5	-7.02	0	#N/A	#N/A	García-Herrero et al., 2021
Apseudopsis latreillii	43.51	-7.03	0	#N/A	#N/A	García-Herrero et al., 2021
Apseudopsis latreillii	43.47	-7.03	0	#N/A	#N/A	García-Herrero et al., 2021
Apseudopsis latreillii	43.49	-7.03	0	#N/A	#N/A	García-Herrero et al., 2021
Apseudopsis latreillii	43.55	-7.03	0	#N/A	#N/A	García-Herrero et al., 2021
Apseudopsis latreillii	43.56	-7.03	0	#N/A	#N/A	García-Herrero et al., 2021
Apseudopsis latreillii	43.46	-7.03	0	#N/A	#N/A	García-Herrero et al., 2021
Apseudopsis latreillii	43.56	-7.02	0	#N/A	#N/A	García-Herrero et al., 2021
Apseudopsis latreillii	42.3242	-8.8408	38	#N/A	#N/A	García-Herrero et al., 2021
Apseudopsis latreillii	42.3242	-8.8358	25	#N/A	#N/A	García-Herrero et al., 2021
Apseudopsis latreillii	42.3192	-8.8408	33	#N/A	#N/A	García-Herrero et al., 2021
Apseudopsis latreillii	42.3075	-8.8358	25	#N/A	#N/A	García-Herrero et al., 2021
Apseudopsis latreillii	42.3075	-8.8192	15	#N/A	#N/A	García-Herrero et al., 2021
Apseudopsis latreillii	42.3037	-8.8508	4	#N/A	#N/A	García-Herrero et al., 2021
Apseudopsis latreillii	42.3025	-8.8408	13	#N/A	#N/A	García-Herrero et al., 2021
Apseudopsis latreillii	42.3025	-8.8358	22	#N/A	#N/A	García-Herrero et al., 2021
Apseudopsis latreillii	42.3025	-8.8242	22	#N/A	#N/A	García-Herrero et al., 2021
Apseudopsis latreillii	42.3025	-8.8192	16	#N/A	#N/A	García-Herrero et al., 2021
Apseudopsis latreillii	42.2908	-8.8408	11	#N/A	#N/A	García-Herrero et al., 2021
Apseudopsis latreillii	42.2947	-8.824	8	#N/A	#N/A	García-Herrero et al., 2021
Apseudopsis latreillii	42.287	-8.8203	12	#N/A	#N/A	García-Herrero et al., 2021
Apseudopsis latreillii	42.2733	-8.8203	4	#N/A	#N/A	García-Herrero et al., 2021
Apseudopsis latreillii	42.1417	-8.842	7	#N/A	#N/A	García-Herrero et al., 2021
Apseudopsis latreillii	42.1383	-8.842	12	#N/A	#N/A	García-Herrero et al., 2021
Apseudopsis latreillii	42.135	-8.8358	10	#N/A	#N/A	García-Herrero et al., 2021
Apseudopsis latreillii	42.125	-8.824	9	#N/A	#N/A	García-Herrero et al., 2021
Apseudopsis latreillii	42.1417	-8.8358	7	#N/A	#N/A	García-Herrero et al., 2021
Apseudopsis latreillii	42.1217	-8.8358	7	#N/A	#N/A	García-Herrero et al., 2021
Apseudopsis latreillii	42.1217	-8.8358	8	#N/A	#N/A	García-Herrero et al., 2021
Apseudopsis latreillii	42.135	-8.824	8	#N/A	#N/A	García-Herrero et al., 2021
Apseudopsis latreillii	42.1334	-8.822	4	#N/A	#N/A	García-Herrero et al., 2021
Apseudopsis latreillii	42.3122	-8.6367	4.6	#N/A	#N/A	García-Herrero et al., 2021
Apseudopsis latreillii	42.3122	-8.6367	18	#N/A	#N/A	García-Herrero et al., 2021
Apseudopsis latreillii	42.3122	-8.6367	10.4	#N/A	#N/A	García-Herrero et al., 2021
Apseudopsis latreillii	42.3122	-8.6367	11.5	#N/A	#N/A	García-Herrero et al., 2021
Apseudopsis latreillii	42.135	-8.8358	7	#N/A	#N/A	García-Herrero et al., 2021
Apseudopsis latreillii	42.135	-8.8358	12	#N/A	#N/A	García-Herrero et al., 2021
Apseudopsis latreillii	42.135	-8.8358	8	#N/A	#N/A	García-Herrero et al., 2021
Apseudopsis latreillii	42.135	-8.8358	9	#N/A	#N/A	García-Herrero et al., 2021
Apseudopsis latreillii	42.135	-8.8358	4	#N/A	#N/A	García-Herrero et al., 2021
Apseudopsis latreillii	42.135	-8.8358	2	#N/A	#N/A	García-Herrero et al., 2021
Apseudopsis latreillii	43.4588	-8.2748	10	#N/A	#N/A	García-Herrero et al., 2021
Apseudopsis latreillii	40.4578	0.4985	15	#N/A	#N/A	García-Herrero et al., 2021
Apseudopsis latreillii	40.4065	0.4465	15	#N/A	#N/A	García-Herrero et al., 2021
Apseudopsis latreillii	40.3485	0.4221	15	#N/A	#N/A	García-Herrero et al., 2021
Apseudopsis latreillii	40.2353	0.3009	15	#N/A	#N/A	García-Herrero et al., 2021
Apseudopsis latreillii	40.1851	0.2397	15	#N/A	#N/A	García-Herrero et al., 2021
Apseudopsis latreillii	40.349	0.9371	45	#N/A	#N/A	García-Herrero et al., 2021
Apseudopsis latreillii	40.349	0.9371	60	#N/A	#N/A	García-Herrero et al., 2021
Apseudopsis latreillii	42.4866	-8.8378	0	#N/A	#N/A	García-Herrero et al., 2021
Apseudopsis latreillii	42.4773	-8.8454	0	#N/A	#N/A	García-Herrero et al., 2021
Apseudopsis latreillii	42.4766	-8.8371	0	#N/A	#N/A	García-Herrero et al., 2021
Apseudopsis latreillii	42.4684	-8.8465	0	#N/A	#N/A	García-Herrero et al., 2021
Apseudopsis latreillii	42.4627	-8.8605	0	#N/A	#N/A	García-Herrero et al., 2021
Apseudopsis latreillii	42.4581	-8.8708	0	#N/A	#N/A	García-Herrero et al., 2021
Apseudopsis latreillii	42.458	-8.863	0	#N/A	#N/A	García-Herrero et al., 2021
Apseudopsis latreillii	36.3903	-5.1794	36	#N/A	#N/A	García-Herrero et al., 2021
Apseudopsis latreillii	35.8948	-5.31252	#N/A	#N/A	#N/A	Guerrera Garcia and Garcia, 2004
Apseudopsis latreillii	48.4167	-5	#N/A	#N/A	#N/A	Le Hir and Hily, 2005
Apseudopsis latreillii	42.3292	-8.84583	#N/A	#N/A	#N/A	Lourido et al., 2008
Apseudopsis latreillii	42.3292	-8.8375	#N/A	#N/A	#N/A	Lourido et al., 2008
Apseudopsis latreillii	42.3125	-8.8375	#N/A	#N/A	#N/A	Lourido et al., 2008
Apseudopsis latreillii	42.3125	-8.82083	#N/A	#N/A	#N/A	Lourido et al., 2008
Apseudopsis latreillii	42.3061	-8.85139	#N/A	#N/A	#N/A	Lourido et al., 2008
Apseudopsis latreillii	42.2561	-8.84583	#N/A	#N/A	#N/A	Lourido et al., 2008
Apseudopsis latreillii	42.2561	-8.8375	#N/A	#N/A	#N/A	Lourido et al., 2008
Apseudopsis latreillii	42.3061	-8.82917	#N/A	#N/A	#N/A	Lourido et al., 2008
Apseudopsis latreillii	42.3061	-8.82083	#N/A	#N/A	#N/A	Lourido et al., 2008
Apseudopsis latreillii	42.2958	-8.84583	#N/A	#N/A	#N/A	Lourido et al., 2008
Apseudopsis latreillii	42.2958	-8.82083	#N/A	#N/A	#N/A	Lourido et al., 2008
Apseudopsis latreillii	42.2894	-8.82278	#N/A	#N/A	#N/A	Lourido et al., 2008
Apseudopsis latreillii	42.2778	-8.82278	#N/A	#N/A	#N/A	Lourido et al., 2008
Apseudopsis latreillii	37.5753	-0.849265	#N/A	#N/A	#N/A	Marín-Guirao et al., 2005
Apseudopsis latreillii	47.7102	-3.355	#N/A	#N/A	#N/A	Milne Edwards, 1828
Apseudopsis latreillii	42.15	-8.85	#N/A	#N/A	#N/A	Moreira et al., 2008
Apseudopsis latreillii	37.293	-8.86605	#N/A	#N/A	#N/A	Pereira et al., 2006
Apseudopsis latreillii	36.1575	-5.35867	#N/A	#N/A	#N/A	Sánchez-Moyano et al., 2007
Apseudopsis latreillii	37.412	-1.55765	#N/A	#N/A	#N/A	Sanz-Lázaro and Marin, 2006:
Apseudopsis latreillii	37.9949	24.0385	#N/A	#N/A	#N/A	Simboura and Reizopoulou, 2007
Apseudopsis latreillii	43.4644	-8.28028	#N/A	#N/A	#N/A	Varela et al., 2009
Apseudopsis latreillii	28.163	-15.699	#N/A	#N/A	#N/A	online databases
Apseudopsis latreillii	30.25	-1.75	#N/A	#N/A	WET-56334	online databases
Apseudopsis latreillii	31.3053	29.932	46	1933	MED-EgyptExpeditionTanaidaceaIsopoda-75-40	online databases
Apseudopsis latreillii	33.073	-16.296	#N/A	#N/A	#N/A	online databases
Apseudopsis latreillii	36.59	24.87	130	1986	GR-Kyklades-A26-240	online databases
Apseudopsis latreillii	36.89	25.25	75	1986	GR-Kyklades-A32-240	online databases
Apseudopsis latreillii	37.087	-8.668	#N/A	#N/A	#N/A	online databases
Apseudopsis latreillii	37.14	25.05	90	1986	GR-Kyklades-A35-240	online databases
Apseudopsis latreillii	37.17	24.58	165	1986	GR-Kyklades-A16-240	online databases
Apseudopsis latreillii	37.85	-0.72	#N/A	1999	409929	online databases
Apseudopsis latreillii	37.87	-0.74	#N/A	1999	409931	online databases
Apseudopsis latreillii	37.9335	-8.83818	8.1	2011	MeshAtlantic-2011: RV Diplodus_19	online databases
Apseudopsis latreillii	38.09	-0.6	#N/A	2002	409935	online databases
Apseudopsis latreillii	38.15	-0.441667	40	#N/A	Maerl_Diversity_Species_Inventory_UAC_2468	online databases
Apseudopsis latreillii	38.4091	-9.19629	8	#N/A	#N/A	online databases
Apseudopsis latreillii	38.4093	-9.20331	8	#N/A	#N/A	online databases
Apseudopsis latreillii	38.4101	-9.19458	8	#N/A	#N/A	online databases
Apseudopsis latreillii	38.433	-9.063	20	2007	#N/A	online databases
Apseudopsis latreillii	38.4331	-9.08132	8	1984	#N/A	online databases
Apseudopsis latreillii	38.4331	-9.08132	#N/A	2010	#N/A	online databases
Apseudopsis latreillii	38.434	-9.063	10	2007	#N/A	online databases
Apseudopsis latreillii	38.436	-9.052	30	2007	#N/A	online databases
Apseudopsis latreillii	38.439	-9.052	10	2007	#N/A	online databases
Apseudopsis latreillii	38.4399	-9.05249	8	#N/A	#N/A	online databases
Apseudopsis latreillii	38.44	-9.04	20	2007	#N/A	online databases
Apseudopsis latreillii	38.444	-9.04	10	2007	#N/A	online databases
Apseudopsis latreillii	38.445	-9.029	10	2007	#N/A	online databases
Apseudopsis latreillii	38.445	-9.029	30	2007	#N/A	online databases
Apseudopsis latreillii	38.446	-9.019	30	2007	#N/A	online databases
Apseudopsis latreillii	38.45	-9.005	50	2007	#N/A	online databases
Apseudopsis latreillii	38.451	-9.005	30	2007	#N/A	online databases
Apseudopsis latreillii	38.456	-9.005	10	2007	#N/A	online databases
Apseudopsis latreillii	38.457	-8.993	20	2007	#N/A	online databases
Apseudopsis latreillii	38.46	-8.993	10	2007	#N/A	online databases
Apseudopsis latreillii	38.4775	-8.97321	8	#N/A	#N/A	online databases
Apseudopsis latreillii	38.4983	-0.133333	40	#N/A	Maerl_Diversity_Species_Inventory_UAI_2467	online databases
Apseudopsis latreillii	38.5	-0.2	#N/A	1997	409934	online databases
Apseudopsis latreillii	38.57	-0.03	#N/A	2001	409936	online databases
Apseudopsis latreillii	38.89	0.11	#N/A	1998	409928	online databases
Apseudopsis latreillii	39.12	-0.18	#N/A	2000	409938	online databases
Apseudopsis latreillii	39.53	-0.21	#N/A	1999	409933	online databases
Apseudopsis latreillii	39.68	-0.18	#N/A	2000	409932	online databases
Apseudopsis latreillii	41.325	9.21496	#N/A	2020	#N/A	online databases
Apseudopsis latreillii	41.358	9.20045	#N/A	2020	#N/A	online databases
Apseudopsis latreillii	41.4253	9.2436	#N/A	2009	#N/A	online databases
Apseudopsis latreillii	41.4638	9.008	#N/A	2012	#N/A	online databases
Apseudopsis latreillii	41.4677	9.2856	#N/A	2009	#N/A	online databases
Apseudopsis latreillii	41.6086	9.3146	#N/A	2009	#N/A	online databases
Apseudopsis latreillii	41.8903	8.7964	#N/A	2009	#N/A	online databases
Apseudopsis latreillii	42.248	-8.79067	40	#N/A	Maerl_Diversity_Species_Inventory_USI_2466	online databases
Apseudopsis latreillii	42.2522	-8.76683	40	#N/A	Maerl_Diversity_Species_Inventory_USC_2465	online databases
Apseudopsis latreillii	42.4453	3.1725	#N/A	2012	#N/A	online databases
Apseudopsis latreillii	42.4605	3.16618	#N/A	2009	#N/A	online databases
Apseudopsis latreillii	42.4605	3.1707	#N/A	2009	#N/A	online databases
Apseudopsis latreillii	42.4605	3.17542	#N/A	2009	#N/A	online databases
Apseudopsis latreillii	42.4667	3.19667	#N/A	1975	#N/A	online databases
Apseudopsis latreillii	42.473	3.16813	#N/A	2009	#N/A	online databases
Apseudopsis latreillii	42.4882	3.142	#N/A	2015	#N/A	online databases
Apseudopsis latreillii	42.4888	3.13867	#N/A	2016	#N/A	online databases
Apseudopsis latreillii	42.4987	3.1465	#N/A	2015	#N/A	online databases
Apseudopsis latreillii	42.5053	3.12583	#N/A	1967	#N/A	online databases
Apseudopsis latreillii	42.5057	3.13736	#N/A	2010	#N/A	online databases
Apseudopsis latreillii	42.5057	3.13737	#N/A	2010	#N/A	online databases
Apseudopsis latreillii	42.5067	3.14317	#N/A	2016	#N/A	online databases
Apseudopsis latreillii	42.5083	3.15183	#N/A	2009	#N/A	online databases
Apseudopsis latreillii	42.5317	3.0894	#N/A	2015	#N/A	online databases
Apseudopsis latreillii	42.5427	9.5554	#N/A	2009	#N/A	online databases
Apseudopsis latreillii	42.5442	3.26736	#N/A	2010	#N/A	online databases
Apseudopsis latreillii	42.5442	3.26737	#N/A	2010	#N/A	online databases
Apseudopsis latreillii	42.5551	3.18038	#N/A	2010	#N/A	online databases
Apseudopsis latreillii	42.5573	3.05355	#N/A	2010	#N/A	online databases
Apseudopsis latreillii	42.5573	3.06888	#N/A	2010	#N/A	online databases
Apseudopsis latreillii	42.5573	3.12555	#N/A	2010	#N/A	online databases
Apseudopsis latreillii	42.5573	3.14721	#N/A	2010	#N/A	online databases
Apseudopsis latreillii	42.5573	3.05355	#N/A	2010	#N/A	online databases
Apseudopsis latreillii	42.5573	3.06888	#N/A	2010	#N/A	online databases
Apseudopsis latreillii	42.5573	3.12555	#N/A	2010	#N/A	online databases
Apseudopsis latreillii	42.5573	3.14722	#N/A	2010	#N/A	online databases
Apseudopsis latreillii	42.5799	8.7292	#N/A	2006	#N/A	online databases
Apseudopsis latreillii	42.5799	8.7305	#N/A	2012	#N/A	online databases
Apseudopsis latreillii	42.5888	3.16583	#N/A	2010	#N/A	online databases
Apseudopsis latreillii	42.5888	3.16583	#N/A	2010	#N/A	online databases
Apseudopsis latreillii	42.5889	3.12221	#N/A	2010	#N/A	online databases
Apseudopsis latreillii	42.5889	3.12222	#N/A	2010	#N/A	online databases
Apseudopsis latreillii	42.589	3.0764	#N/A	2010	#N/A	online databases
Apseudopsis latreillii	42.5901	3.05338	#N/A	1968	#N/A	online databases
Apseudopsis latreillii	42.5975	3.0555	#N/A	2011	#N/A	online databases
Apseudopsis latreillii	42.6185	9.49948	#N/A	2012	#N/A	online databases
Apseudopsis latreillii	42.6438	3.1835	#N/A	2008	#N/A	online databases
Apseudopsis latreillii	42.6506	3.05388	#N/A	2010	#N/A	online databases
Apseudopsis latreillii	42.6506	3.07721	#N/A	2010	#N/A	online databases
Apseudopsis latreillii	42.6506	3.07722	#N/A	2010	#N/A	online databases
Apseudopsis latreillii	42.6506	3.11388	#N/A	2010	#N/A	online databases
Apseudopsis latreillii	42.6906	3.05388	#N/A	2010	#N/A	online databases
Apseudopsis latreillii	42.6906	3.07555	#N/A	2010	#N/A	online databases
Apseudopsis latreillii	42.6906	3.14555	#N/A	2010	#N/A	online databases
Apseudopsis latreillii	42.7042	3.06667	#N/A	2008	#N/A	online databases
Apseudopsis latreillii	42.7231	3.04721	#N/A	2010	#N/A	online databases
Apseudopsis latreillii	42.7231	3.04722	#N/A	2010	#N/A	online databases
Apseudopsis latreillii	42.7244	3.05338	#N/A	2010	#N/A	online databases
Apseudopsis latreillii	42.7326	3.08321	#N/A	2010	#N/A	online databases
Apseudopsis latreillii	42.7326	3.08322	#N/A	2010	#N/A	online databases
Apseudopsis latreillii	42.7789	3.04838	#N/A	2010	#N/A	online databases
Apseudopsis latreillii	42.7789	3.05588	#N/A	2010	#N/A	online databases
Apseudopsis latreillii	42.779	3.10555	#N/A	2010	#N/A	online databases
Apseudopsis latreillii	42.8014	9.3339	#N/A	2009	#N/A	online databases
Apseudopsis latreillii	42.849	3.05721	#N/A	2010	#N/A	online databases
Apseudopsis latreillii	42.849	3.17888	#N/A	2010	#N/A	online databases
Apseudopsis latreillii	42.8521	3.0661	#N/A	2015	#N/A	online databases
Apseudopsis latreillii	42.9323	3.06103	#N/A	2010	#N/A	online databases
Apseudopsis latreillii	42.9323	3.07503	#N/A	2010	#N/A	online databases
Apseudopsis latreillii	42.9323	3.08553	#N/A	2010	#N/A	online databases
Apseudopsis latreillii	42.9323	3.11005	#N/A	2010	#N/A	online databases
Apseudopsis latreillii	42.9323	3.20838	#N/A	2010	#N/A	online databases
Apseudopsis latreillii	42.9766	3.08808	#N/A	2015	#N/A	online databases
Apseudopsis latreillii	42.9788	3.07398	#N/A	2015	#N/A	online databases
Apseudopsis latreillii	42.9811	3.06282	#N/A	2015	#N/A	online databases
Apseudopsis latreillii	42.983	3.05355	#N/A	2015	#N/A	online databases
Apseudopsis latreillii	42.9958	3.0862	#N/A	2000	#N/A	online databases
Apseudopsis latreillii	42.9962	3.07937	#N/A	2015	#N/A	online databases
Apseudopsis latreillii	42.9979	3.08083	#N/A	2015	#N/A	online databases
Apseudopsis latreillii	43.0013	3.08187	#N/A	2010	#N/A	online databases
Apseudopsis latreillii	43.0013	3.09203	#N/A	2010	#N/A	online databases
Apseudopsis latreillii	43.0013	3.17938	#N/A	2010	#N/A	online databases
Apseudopsis latreillii	43.0217	3.17352	#N/A	2002	#N/A	online databases
Apseudopsis latreillii	43.0218	3.18614	#N/A	2002	#N/A	online databases
Apseudopsis latreillii	43.0266	3.09247	#N/A	2015	#N/A	online databases
Apseudopsis latreillii	43.0297	3.08135	#N/A	2015	#N/A	online databases
Apseudopsis latreillii	43.0312	3.11874	#N/A	2009	#N/A	online databases
Apseudopsis latreillii	43.0327	3.17852	#N/A	2002	#N/A	online databases
Apseudopsis latreillii	43.033	3.10382	#N/A	2008	#N/A	online databases
Apseudopsis latreillii	43.0344	3.09857	#N/A	2008	#N/A	online databases
Apseudopsis latreillii	43.0356	3.13512	#N/A	2002	#N/A	online databases
Apseudopsis latreillii	43.0375	3.09115	#N/A	2008	#N/A	online databases
Apseudopsis latreillii	43.0383	3.15113	#N/A	2002	#N/A	online databases
Apseudopsis latreillii	43.0396	3.1947	#N/A	2002	#N/A	online databases
Apseudopsis latreillii	43.0406	3.30722	#N/A	2010	#N/A	online databases
Apseudopsis latreillii	43.0414	3.10433	#N/A	2015	#N/A	online databases
Apseudopsis latreillii	43.0431	3.15291	#N/A	2002	#N/A	online databases
Apseudopsis latreillii	43.044	3.12971	#N/A	2009	#N/A	online databases
Apseudopsis latreillii	43.0447	3.08847	#N/A	2015	#N/A	online databases
Apseudopsis latreillii	43.0484	3.1132	#N/A	2008	#N/A	online databases
Apseudopsis latreillii	43.05	3.10742	#N/A	2008	#N/A	online databases
Apseudopsis latreillii	43.0523	3.10028	#N/A	2008	#N/A	online databases
Apseudopsis latreillii	43.053	3.15532	#N/A	2002	#N/A	online databases
Apseudopsis latreillii	43.0536	3.14091	#N/A	2002	#N/A	online databases
Apseudopsis latreillii	43.062	3.14769	#N/A	2009	#N/A	online databases
Apseudopsis latreillii	43.0681	3.12603	#N/A	2008	#N/A	online databases
Apseudopsis latreillii	43.0687	3.16169	#N/A	2002	#N/A	online databases
Apseudopsis latreillii	43.0694	3.12045	#N/A	2008	#N/A	online databases
Apseudopsis latreillii	43.0699	3.17381	#N/A	2002	#N/A	online databases
Apseudopsis latreillii	43.0716	3.11173	#N/A	2008	#N/A	online databases
Apseudopsis latreillii	43.0726	3.10335	#N/A	2008	#N/A	online databases
Apseudopsis latreillii	43.0844	4.60065	#N/A	2008	#N/A	online databases
Apseudopsis latreillii	43.0896	3.19053	#N/A	2010	#N/A	online databases
Apseudopsis latreillii	43.0926	5.965	#N/A	2009	#N/A	online databases
Apseudopsis latreillii	43.1023	6.3868	#N/A	2009	#N/A	online databases
Apseudopsis latreillii	43.11	3.15697	#N/A	2014	#N/A	online databases
Apseudopsis latreillii	43.1101	3.18112	#N/A	2014	#N/A	online databases
Apseudopsis latreillii	43.1108	3.13828	#N/A	2014	#N/A	online databases
Apseudopsis latreillii	43.1113	5.75075	#N/A	2012	#N/A	online databases
Apseudopsis latreillii	43.113	3.17393	#N/A	2014	#N/A	online databases
Apseudopsis latreillii	43.1156	3.1572	#N/A	2010	#N/A	online databases
Apseudopsis latreillii	43.1191	3.16288	#N/A	2014	#N/A	online databases
Apseudopsis latreillii	43.1195	3.15287	#N/A	2010	#N/A	online databases
Apseudopsis latreillii	43.1255	3.14973	#N/A	2014	#N/A	online databases
Apseudopsis latreillii	43.127	3.1695	#N/A	2014	#N/A	online databases
Apseudopsis latreillii	43.1323	3.2572	#N/A	2010	#N/A	online databases
Apseudopsis latreillii	43.1339	3.15742	#N/A	2014	#N/A	online databases
Apseudopsis latreillii	43.1532	3.2044	#N/A	2012	#N/A	online databases
Apseudopsis latreillii	43.1607	3.22495	#N/A	2010	#N/A	online databases
Apseudopsis latreillii	43.1659	4.65005	#N/A	2007	#N/A	online databases
Apseudopsis latreillii	43.1663	4.73206	#N/A	2007	#N/A	online databases
Apseudopsis latreillii	43.1777	6.5604	#N/A	2012	#N/A	online databases
Apseudopsis latreillii	43.1865	3.22387	#N/A	2010	#N/A	online databases
Apseudopsis latreillii	43.1959	5.3799	#N/A	2012	#N/A	online databases
Apseudopsis latreillii	43.199	3.40722	#N/A	2010	#N/A	online databases
Apseudopsis latreillii	43.199	3.59472	#N/A	2010	#N/A	online databases
Apseudopsis latreillii	43.2043	5.3473	#N/A	2009	#N/A	online databases
Apseudopsis latreillii	43.2051	3.41092	#N/A	2009	#N/A	online databases
Apseudopsis latreillii	43.213	3.41352	#N/A	2009	#N/A	online databases
Apseudopsis latreillii	43.2159	3.57988	#N/A	2010	#N/A	online databases
Apseudopsis latreillii	43.2204	4.6982	#N/A	2008	#N/A	online databases
Apseudopsis latreillii	43.2207	4.69846	#N/A	2007	#N/A	online databases
Apseudopsis latreillii	43.2295	3.41573	#N/A	2009	#N/A	online databases
Apseudopsis latreillii	43.2391	3.4711	#N/A	2015	#N/A	online databases
Apseudopsis latreillii	43.2401	4.88092	#N/A	2007	#N/A	online databases
Apseudopsis latreillii	43.2441	3.47813	#N/A	2005	#N/A	online databases
Apseudopsis latreillii	43.2451	4.73725	#N/A	2008	#N/A	online databases
Apseudopsis latreillii	43.2454	4.7309	#N/A	2008	#N/A	online databases
Apseudopsis latreillii	43.2478	3.41777	#N/A	2009	#N/A	online databases
Apseudopsis latreillii	43.2486	3.41243	#N/A	1998	#N/A	online databases
Apseudopsis latreillii	43.2486	4.7269	#N/A	2007	#N/A	online databases
Apseudopsis latreillii	43.261	3.36353	#N/A	2010	#N/A	online databases
Apseudopsis latreillii	43.261	3.54888	#N/A	2010	#N/A	online databases
Apseudopsis latreillii	43.2635	4.88193	#N/A	2008	#N/A	online databases
Apseudopsis latreillii	43.2643	4.8162	#N/A	2008	#N/A	online databases
Apseudopsis latreillii	43.2658	5.323	#N/A	2012	#N/A	online databases
Apseudopsis latreillii	43.2665	4.88128	#N/A	2007	#N/A	online databases
Apseudopsis latreillii	43.2666	4.9675	#N/A	2008	#N/A	online databases
Apseudopsis latreillii	43.2715	3.5398	#N/A	2009	#N/A	online databases
Apseudopsis latreillii	43.2716	3.53988	#N/A	2010	#N/A	online databases
Apseudopsis latreillii	43.2723	4.76998	#N/A	2008	#N/A	online databases
Apseudopsis latreillii	43.2823	3.72888	#N/A	2010	#N/A	online databases
Apseudopsis latreillii	43.2823	4.42805	#N/A	2010	#N/A	online databases
Apseudopsis latreillii	43.2823	4.59057	#N/A	2010	#N/A	online databases
Apseudopsis latreillii	43.2928	4.78705	#N/A	2008	#N/A	online databases
Apseudopsis latreillii	43.2938	4.79828	#N/A	2007	#N/A	online databases
Apseudopsis latreillii	43.2956	4.66219	#N/A	2011	#N/A	online databases
Apseudopsis latreillii	43.2985	4.85575	#N/A	2008	#N/A	online databases
Apseudopsis latreillii	43.2986	4.5954	#N/A	2010	#N/A	online databases
Apseudopsis latreillii	43.3002	4.85668	#N/A	2007	#N/A	online databases
Apseudopsis latreillii	43.3005	4.88237	#N/A	2008	#N/A	online databases
Apseudopsis latreillii	43.3024	4.8226	#N/A	2008	#N/A	online databases
Apseudopsis latreillii	43.3031	4.7489	#N/A	2010	#N/A	online databases
Apseudopsis latreillii	43.3033	4.82942	#N/A	2008	#N/A	online databases
Apseudopsis latreillii	43.3037	4.87881	#N/A	2007	#N/A	online databases
Apseudopsis latreillii	43.3039	4.84903	#N/A	2011	#N/A	online databases
Apseudopsis latreillii	43.3084	4.78668	#N/A	2007	#N/A	online databases
Apseudopsis latreillii	43.309	4.7489	#N/A	2010	#N/A	online databases
Apseudopsis latreillii	43.3113	4.84837	#N/A	2011	#N/A	online databases
Apseudopsis latreillii	43.3115	4.85071	#N/A	2007	#N/A	online databases
Apseudopsis latreillii	43.3145	4.8568	#N/A	2011	#N/A	online databases
Apseudopsis latreillii	43.3161	4.83137	#N/A	2011	#N/A	online databases
Apseudopsis latreillii	43.3205	4.81875	#N/A	2011	#N/A	online databases
Apseudopsis latreillii	43.3208	4.43573	#N/A	2010	#N/A	online databases
Apseudopsis latreillii	43.323	3.6647	#N/A	1998	#N/A	online databases
Apseudopsis latreillii	43.324	4.60307	#N/A	2010	#N/A	online databases
Apseudopsis latreillii	43.3245	4.87167	#N/A	2011	#N/A	online databases
Apseudopsis latreillii	43.333	4.72	#N/A	2015	#N/A	online databases
Apseudopsis latreillii	43.3363	4.51308	#N/A	2011	#N/A	online databases
Apseudopsis latreillii	43.3364	4.60368	#N/A	2011	#N/A	online databases
Apseudopsis latreillii	43.3366	5.02413	#N/A	2015	#N/A	online databases
Apseudopsis latreillii	43.3371	5.3269	#N/A	2009	#N/A	online databases
Apseudopsis latreillii	43.339	4.18553	#N/A	2010	#N/A	online databases
Apseudopsis latreillii	43.3406	3.70722	#N/A	2010	#N/A	online databases
Apseudopsis latreillii	43.3423	3.7769	#N/A	2010	#N/A	online databases
Apseudopsis latreillii	43.3453	4.53042	#N/A	2011	#N/A	online databases
Apseudopsis latreillii	43.3517	3.77793	#N/A	2010	#N/A	online databases
Apseudopsis latreillii	43.3531	4.2873	#N/A	2010	#N/A	online databases
Apseudopsis latreillii	43.357	4.55219	#N/A	2011	#N/A	online databases
Apseudopsis latreillii	43.3606	4.9293	#N/A	2012	#N/A	online databases
Apseudopsis latreillii	43.3614	3.77922	#N/A	2010	#N/A	online databases
Apseudopsis latreillii	43.3615	3.87387	#N/A	2010	#N/A	online databases
Apseudopsis latreillii	43.3645	-1.76643	#N/A	#N/A	#N/A	online databases
Apseudopsis latreillii	43.367	3.74038	#N/A	2010	#N/A	online databases
Apseudopsis latreillii	43.3681	3.75352	#N/A	2010	#N/A	online databases
Apseudopsis latreillii	43.3691	3.76712	#N/A	2010	#N/A	online databases
Apseudopsis latreillii	43.3698	4.4489	#N/A	2010	#N/A	online databases
Apseudopsis latreillii	43.3708	3.78023	#N/A	2010	#N/A	online databases
Apseudopsis latreillii	43.3721	3.79338	#N/A	2010	#N/A	online databases
Apseudopsis latreillii	43.3731	3.69555	#N/A	2010	#N/A	online databases
Apseudopsis latreillii	43.3733	3.8063	#N/A	2010	#N/A	online databases
Apseudopsis latreillii	43.3744	3.81915	#N/A	2010	#N/A	online databases
Apseudopsis latreillii	43.3758	3.78075	#N/A	2010	#N/A	online databases
Apseudopsis latreillii	43.3772	3.7113	#N/A	2009	#N/A	online databases
Apseudopsis latreillii	43.3775	3.8568	#N/A	2010	#N/A	online databases
Apseudopsis latreillii	43.3805	3.7811	#N/A	2010	#N/A	online databases
Apseudopsis latreillii	43.3816	4.51109	#N/A	2011	#N/A	online databases
Apseudopsis latreillii	43.3819	4.48327	#N/A	2011	#N/A	online databases
Apseudopsis latreillii	43.3823	3.69055	#N/A	2010	#N/A	online databases
Apseudopsis latreillii	43.3823	4.46973	#N/A	2010	#N/A	online databases
Apseudopsis latreillii	43.3855	4.8955	#N/A	2012	#N/A	online databases
Apseudopsis latreillii	43.39	3.78213	#N/A	2010	#N/A	online databases
Apseudopsis latreillii	43.3963	4.49354	#N/A	2011	#N/A	online databases
Apseudopsis latreillii	43.3995	3.7835	#N/A	2010	#N/A	online databases
Apseudopsis latreillii	43.4006	3.72219	#N/A	2009	#N/A	online databases
Apseudopsis latreillii	43.4014	4.55201	#N/A	2011	#N/A	online databases
Apseudopsis latreillii	43.4046	3.71651	#N/A	2009	#N/A	online databases
Apseudopsis latreillii	43.4059	4.47615	#N/A	2011	#N/A	online databases
Apseudopsis latreillii	43.4073	3.72161	#N/A	2009	#N/A	online databases
Apseudopsis latreillii	43.4094	4.53109	#N/A	2011	#N/A	online databases
Apseudopsis latreillii	43.4096	4.4226	#N/A	2007	#N/A	online databases
Apseudopsis latreillii	43.4117	4.56527	#N/A	2011	#N/A	online databases
Apseudopsis latreillii	43.4123	4.5775	#N/A	2011	#N/A	online databases
Apseudopsis latreillii	43.4133	4.50217	#N/A	2018	#N/A	online databases
Apseudopsis latreillii	43.4153	3.834	#N/A	2010	#N/A	online databases
Apseudopsis latreillii	43.4156	4.31555	#N/A	2010	#N/A	online databases
Apseudopsis latreillii	43.4179	4.43715	#N/A	2011	#N/A	online databases
Apseudopsis latreillii	43.4207	6.88174	#N/A	2012	#N/A	online databases
Apseudopsis latreillii	43.4226	6.8818	#N/A	2012	#N/A	online databases
Apseudopsis latreillii	43.4248	4.51208	#N/A	2011	#N/A	online databases
Apseudopsis latreillii	43.4264	3.94346	#N/A	2013	#N/A	online databases
Apseudopsis latreillii	43.4307	4.54927	#N/A	2011	#N/A	online databases
Apseudopsis latreillii	43.4326	3.96003	#N/A	2013	#N/A	online databases
Apseudopsis latreillii	43.4339	3.96326	#N/A	2003	#N/A	online databases
Apseudopsis latreillii	43.4352	4.20583	#N/A	2015	#N/A	online databases
Apseudopsis latreillii	43.4352	3.96657	#N/A	2003	#N/A	online databases
Apseudopsis latreillii	43.4356	3.96765	#N/A	2006	#N/A	online databases
Apseudopsis latreillii	43.4359	4.55755	#N/A	2011	#N/A	online databases
Apseudopsis latreillii	43.4369	3.97093	#N/A	2015	#N/A	online databases
Apseudopsis latreillii	43.4381	4.32405	#N/A	2010	#N/A	online databases
Apseudopsis latreillii	43.439	4.52737	#N/A	2011	#N/A	online databases
Apseudopsis latreillii	43.4391	4.48896	#N/A	2011	#N/A	online databases
Apseudopsis latreillii	43.4391	4.39495	#N/A	2011	#N/A	online databases
Apseudopsis latreillii	43.4393	3.96326	#N/A	2017	#N/A	online databases
Apseudopsis latreillii	43.4405	4.48357	#N/A	2010	#N/A	online databases
Apseudopsis latreillii	43.443	4.50146	#N/A	2011	#N/A	online databases
Apseudopsis latreillii	43.4431	3.98729	#N/A	2015	#N/A	online databases
Apseudopsis latreillii	43.4456	4.15888	#N/A	2010	#N/A	online databases
Apseudopsis latreillii	43.4463	4.28049	#N/A	2011	#N/A	online databases
Apseudopsis latreillii	43.4466	-7.03474	0	1990	30.sty	online databases
Apseudopsis latreillii	43.4517	-7.03417	0	1990	28.sty	online databases
Apseudopsis latreillii	43.4564	4.22372	#N/A	2011	#N/A	online databases
Apseudopsis latreillii	43.459	4.15722	#N/A	2010	#N/A	online databases
Apseudopsis latreillii	43.4639	-7.03487	0	1990	128-1	online databases
Apseudopsis latreillii	43.4646	4.15472	#N/A	2011	#N/A	online databases
Apseudopsis latreillii	43.4681	-8.22428	#N/A	2018	#N/A	online databases
Apseudopsis latreillii	43.47	-8.22	#N/A	2021	#N/A	online databases
Apseudopsis latreillii	43.473	-7.03454	0	1990	129-1	online databases
Apseudopsis latreillii	43.4738	-7.03339	0	1990	44-1	online databases
Apseudopsis latreillii	43.4798	-8.18842	#N/A	2018	#N/A	online databases
Apseudopsis latreillii	43.483	-8.18564	#N/A	2018	#N/A	online databases
Apseudopsis latreillii	43.4866	-7.02494	0	1990	13.sty	online databases
Apseudopsis latreillii	43.4867	-8.18058	#N/A	2018	#N/A	online databases
Apseudopsis latreillii	43.4885	-7.02652	0	1990	83-1	online databases
Apseudopsis latreillii	43.4906	3.99222	#N/A	2010	#N/A	online databases
Apseudopsis latreillii	43.4908	-7.02205	0	1990	20.sty	online databases
Apseudopsis latreillii	43.4996	-7.02579	0	1990	33-1	online databases
Apseudopsis latreillii	43.5044	-7.03324	0	1990	45-1	online databases
Apseudopsis latreillii	43.5071	-7.02199	0	1990	38-1	online databases
Apseudopsis latreillii	43.51	4.11045	#N/A	2004	#N/A	online databases
Apseudopsis latreillii	43.5124	-7.03287	0	1990	70-1	online databases
Apseudopsis latreillii	43.5144	4.12115	#N/A	2004	#N/A	online databases
Apseudopsis latreillii	43.526	4.0533	#N/A	2018	#N/A	online databases
Apseudopsis latreillii	43.5324	-7.02788	0	1990	100-1	online databases
Apseudopsis latreillii	43.5528	-7.02915	0	1990	114-1	online databases
Apseudopsis latreillii	43.5561	-7.02483	0	1990	153-1	online databases
Apseudopsis latreillii	43.5627	-7.02936	0	1990	119-1	online databases
Apseudopsis latreillii	43.564	-7.02723	0	1990	151-1	online databases
Apseudopsis latreillii	43.6131	7.1351	#N/A	2012	#N/A	online databases
Apseudopsis latreillii	43.6475	7.21944	#N/A	2012	#N/A	online databases
Apseudopsis latreillii	43.7558	7.4948	#N/A	2012	#N/A	online databases
Apseudopsis latreillii	45.61	13.7425	8.5	2013	#N/A	online databases
Apseudopsis latreillii	46.6027	-1.95634	19	2007	#N/A	online databases
Apseudopsis latreillii	46.7273	-2.3483	#N/A	2011	#N/A	online databases
Apseudopsis latreillii	47.0294	-2.2016	4	2006	#N/A	online databases
Apseudopsis latreillii	47.031	-2.15473	#N/A	2016	#N/A	online databases
Apseudopsis latreillii	47.032	-2.15118	6	2007	#N/A	online databases
Apseudopsis latreillii	47.032	-2.15118	#N/A	2010	#N/A	online databases
Apseudopsis latreillii	47.032	-2.15117	#N/A	2016	#N/A	online databases
Apseudopsis latreillii	47.032	2.15118	6	2007	#N/A	online databases
Apseudopsis latreillii	47.0341	-2.15387	#N/A	2016	#N/A	online databases
Apseudopsis latreillii	47.0374	-2.19113	9	2006	#N/A	online databases
Apseudopsis latreillii	47.0488	-2.24002	#N/A	2009	#N/A	online databases
Apseudopsis latreillii	47.0489	-2.24001	#N/A	2006	#N/A	online databases
Apseudopsis latreillii	47.0499	-2.24451	#N/A	2006	#N/A	online databases
Apseudopsis latreillii	47.0502	-2.23563	#N/A	2009	#N/A	online databases
Apseudopsis latreillii	47.0503	-2.23559	#N/A	2006	#N/A	online databases
Apseudopsis latreillii	47.0526	-2.12559	7	2006	#N/A	online databases
Apseudopsis latreillii	47.0534	-2.19184	7	2007	#N/A	online databases
Apseudopsis latreillii	47.0756	-2.19121	12	2006	#N/A	online databases
Apseudopsis latreillii	47.0884	-2.29909	17	2006	#N/A	online databases
Apseudopsis latreillii	47.3312	-3.13018	#N/A	2013	#N/A	online databases
Apseudopsis latreillii	47.3312	3.13018	#N/A	2016	#N/A	online databases
Apseudopsis latreillii	47.3313	-3.13253	#N/A	2015	#N/A	online databases
Apseudopsis latreillii	47.3315	-3.13542	#N/A	2013	#N/A	online databases
Apseudopsis latreillii	47.3315	3.13542	#N/A	2016	#N/A	online databases
Apseudopsis latreillii	47.3751	-2.94752	#N/A	2011	#N/A	online databases
Apseudopsis latreillii	47.3797	-2.86654	#N/A	2011	#N/A	online databases
Apseudopsis latreillii	47.3965	-2.97222	#N/A	2011	#N/A	online databases
Apseudopsis latreillii	47.4003	-3.10031	#N/A	2011	#N/A	online databases
Apseudopsis latreillii	47.4134	-2.94637	#N/A	2011	#N/A	online databases
Apseudopsis latreillii	47.4821	-3.05063	#N/A	2016	#N/A	online databases
Apseudopsis latreillii	47.4831	-3.05637	#N/A	2016	#N/A	online databases
Apseudopsis latreillii	47.4834	-3.05987	#N/A	2016	#N/A	online databases
Apseudopsis latreillii	47.5258	-2.93448	#N/A	2015	#N/A	online databases
Apseudopsis latreillii	47.526	-2.8982	#N/A	2006	#N/A	online databases
Apseudopsis latreillii	47.5322	-2.87277	#N/A	2006	#N/A	online databases
Apseudopsis latreillii	47.5543	-3.12113	#N/A	2014	#N/A	online databases
Apseudopsis latreillii	47.5592	-3.12017	#N/A	2016	#N/A	online databases
Apseudopsis latreillii	47.5592	-3.12017	#N/A	2012	#N/A	online databases
Apseudopsis latreillii	47.56	-2.8861	#N/A	2006	#N/A	online databases
Apseudopsis latreillii	47.5603	-2.89267	#N/A	2006	#N/A	online databases
Apseudopsis latreillii	47.5633	-3.11905	#N/A	2011	#N/A	online databases
Apseudopsis latreillii	47.6405	-3.41999	#N/A	2010	#N/A	online databases
Apseudopsis latreillii	47.6451	-3.28108	#N/A	2014	#N/A	online databases
Apseudopsis latreillii	47.6471	-3.28482	#N/A	2013	#N/A	online databases
Apseudopsis latreillii	47.6904	-3.30845	#N/A	2013	#N/A	online databases
Apseudopsis latreillii	47.6959	-4.10713	#N/A	2010	#N/A	online databases
Apseudopsis latreillii	47.7014	-3.33045	#N/A	2012	#N/A	online databases
Apseudopsis latreillii	47.7015	-3.32952	#N/A	2016	#N/A	online databases
Apseudopsis latreillii	47.7026	-3.33512	#N/A	2013	#N/A	online databases
Apseudopsis latreillii	47.7035	-3.32937	#N/A	2013	#N/A	online databases
Apseudopsis latreillii	47.7285	-3.96793	#N/A	2006	#N/A	online databases
Apseudopsis latreillii	47.7328	-4.01122	#N/A	2010	#N/A	online databases
Apseudopsis latreillii	47.7342	-4.01767	40	#N/A	Maerl_Diversity_Species_Inventory_UBGC_2463	online databases
Apseudopsis latreillii	47.7342	-3.96583	40	#N/A	Maerl_Diversity_Species_Inventory_UBGI_2464	online databases
Apseudopsis latreillii	47.735	-4.00032	#N/A	2015	#N/A	online databases
Apseudopsis latreillii	47.7827	-4.10153	#N/A	2010	#N/A	online databases
Apseudopsis latreillii	47.7916	-3.88577	#N/A	2010	#N/A	online databases
Apseudopsis latreillii	47.7949	-3.85724	#N/A	2010	#N/A	online databases
Apseudopsis latreillii	47.8144	-3.95895	#N/A	2013	#N/A	online databases
Apseudopsis latreillii	47.8197	-4.08721	#N/A	2010	#N/A	online databases
Apseudopsis latreillii	47.8436	-4.09017	#N/A	2010	#N/A	online databases
Apseudopsis latreillii	47.8594	-4.0892	#N/A	2010	#N/A	online databases
Apseudopsis latreillii	47.8615	-4.39617	#N/A	2013	#N/A	online databases
Apseudopsis latreillii	47.8638	-4.39617	#N/A	2008	#N/A	online databases
Apseudopsis latreillii	47.8661	-3.97819	#N/A	2010	#N/A	online databases
Apseudopsis latreillii	47.8672	-4.39628	#N/A	2016	#N/A	online databases
Apseudopsis latreillii	48	-3	#N/A	2010	ech28	online databases
Apseudopsis latreillii	48.2295	-4.44192	#N/A	2014	#N/A	online databases
Apseudopsis latreillii	48.2933	4.57995	#N/A	2016	#N/A	online databases
Apseudopsis latreillii	48.2968	-4.58078	#N/A	2015	#N/A	online databases
Apseudopsis latreillii	48.3135	4.3653	#N/A	2016	#N/A	online databases
Apseudopsis latreillii	48.3204	-4.38765	#N/A	2013	#N/A	online databases
Apseudopsis latreillii	48.3207	-4.42375	#N/A	2016	#N/A	online databases
Apseudopsis latreillii	48.3218	-4.4105	40	#N/A	Maerl_Diversity_Species_Inventory_UBBC_2461	online databases
Apseudopsis latreillii	48.322	-4.37117	#N/A	2014	#N/A	online databases
Apseudopsis latreillii	48.322	4.37117	#N/A	2016	#N/A	online databases
Apseudopsis latreillii	48.325	-4.39325	#N/A	2011	#N/A	online databases
Apseudopsis latreillii	48.3281	-4.32137	#N/A	2006	#N/A	online databases
Apseudopsis latreillii	48.3309	-4.37137	#N/A	2012	#N/A	online databases
Apseudopsis latreillii	48.3332	-4.45517	#N/A	2016	#N/A	online databases
Apseudopsis latreillii	48.3346	-4.42463	#N/A	2011	#N/A	online databases
Apseudopsis latreillii	48.3371	-4.46015	#N/A	2015	#N/A	online databases
Apseudopsis latreillii	48.3657	-4.4375	40	#N/A	Maerl_Diversity_Species_Inventory_UBBI_2462	online databases
Apseudopsis latreillii	48.3868	-4.85465	#N/A	2013	#N/A	online databases
Apseudopsis latreillii	48.3868	-4.85427	#N/A	2015	#N/A	online databases
Apseudopsis latreillii	48.3868	4.85427	#N/A	2016	#N/A	online databases
Apseudopsis latreillii	48.3877	-4.85392	#N/A	2013	#N/A	online databases
Apseudopsis latreillii	48.5514	-2.68656	#N/A	2016	#N/A	online databases
Apseudopsis latreillii	48.5607	-2.6551	#N/A	2010	#N/A	online databases
Apseudopsis latreillii	48.5658	-2.6663	#N/A	2016	#N/A	online databases
Apseudopsis latreillii	48.5661	-2.66823	#N/A	2016	#N/A	online databases
Apseudopsis latreillii	48.5672	-2.66785	#N/A	2016	#N/A	online databases
Apseudopsis latreillii	48.5809	-4.61725	#N/A	2010	#N/A	online databases
Apseudopsis latreillii	48.5987	-4.56605	#N/A	2006	#N/A	online databases
Apseudopsis latreillii	48.6056	-4.61338	#N/A	2013	#N/A	online databases
Apseudopsis latreillii	48.6056	-4.61337	#N/A	2014	#N/A	online databases
Apseudopsis latreillii	48.6057	-4.61237	#N/A	2016	#N/A	online databases
Apseudopsis latreillii	48.6058	-4.61092	#N/A	2012	#N/A	online databases
Apseudopsis latreillii	48.6058	-4.61092	#N/A	2014	#N/A	online databases
Apseudopsis latreillii	48.6073	-4.61257	#N/A	2015	#N/A	online databases
Apseudopsis latreillii	48.6073	-4.61253	#N/A	2014	#N/A	online databases
Apseudopsis latreillii	48.6239	-2.58022	#N/A	2010	#N/A	online databases
Apseudopsis latreillii	48.6254	-4.5711	#N/A	2024	201925758	online databases
Apseudopsis latreillii	48.6258	-4.57064	#N/A	2024	201925827	online databases
Apseudopsis latreillii	48.6422	-2.10889	#N/A	2014	INV.124027	online databases
Apseudopsis latreillii	48.678	-3.91832	#N/A	2013	#N/A	online databases
Apseudopsis latreillii	48.6781	-3.91735	#N/A	2016	#N/A	online databases
Apseudopsis latreillii	48.6782	-3.92197	#N/A	2013	#N/A	online databases
Apseudopsis latreillii	48.6785	-3.92087	#N/A	2014	#N/A	online databases
Apseudopsis latreillii	48.6787	-3.91825	#N/A	2014	#N/A	online databases
Apseudopsis latreillii	48.6803	-3.91747	#N/A	2014	#N/A	online databases
Apseudopsis latreillii	48.6804	-3.91748	#N/A	2013	#N/A	online databases
Apseudopsis latreillii	48.6862	-2.87443	#N/A	2010	#N/A	online databases
Apseudopsis latreillii	48.6888	-3.90615	#N/A	2013	#N/A	online databases
Apseudopsis latreillii	48.6889	-3.90645	#N/A	2013	#N/A	online databases
Apseudopsis latreillii	48.7083	-3.8662	#N/A	2015	#N/A	online databases
Apseudopsis latreillii	48.7083	-3.86617	#N/A	2010	#N/A	online databases
Apseudopsis latreillii	48.7111	-3.95097	#N/A	2012	#N/A	online databases
Apseudopsis latreillii	48.7122	-3.9337	#N/A	2015	#N/A	online databases
Apseudopsis latreillii	48.7123	-3.95113	#N/A	2012	#N/A	online databases
Apseudopsis latreillii	48.7168	-3.9834	#N/A	2009	INV.67738	online databases
Apseudopsis latreillii	48.7205	-4.0784	#N/A	2011	#N/A	online databases
Apseudopsis latreillii	48.7356	-3.99835	#N/A	2011	#N/A	online databases
Apseudopsis latreillii	48.7374	-3.58853	#N/A	2011	#N/A	online databases
Apseudopsis latreillii	48.738	-3.56363	#N/A	2011	#N/A	online databases
Apseudopsis latreillii	48.7528	-3.56588	#N/A	2011	#N/A	online databases
Apseudopsis latreillii	48.761	-4.15182	#N/A	2019	#N/A	online databases
Apseudopsis latreillii	48.7742	-3.60475	#N/A	2011	#N/A	online databases
Apseudopsis latreillii	48.7871	-2.87	#N/A	2013	#N/A	online databases
Apseudopsis latreillii	48.7873	-2.90715	#N/A	2009	#N/A	online databases
Apseudopsis latreillii	48.8133	-3.57078	#N/A	2011	#N/A	online databases
Apseudopsis latreillii	48.8143	-3.53844	#N/A	2010	#N/A	online databases
Apseudopsis latreillii	48.8192	-3.45462	#N/A	2011	#N/A	online databases
Apseudopsis latreillii	48.8235	-3.0211	#N/A	2014	#N/A	online databases
Apseudopsis latreillii	48.8235	-3.0203	#N/A	2014	#N/A	online databases
Apseudopsis latreillii	48.8235	-3.0211	#N/A	2013	#N/A	online databases
Apseudopsis latreillii	48.8235	-3.01943	#N/A	2013	#N/A	online databases
Apseudopsis latreillii	48.8235	-3.01942	#N/A	2014	#N/A	online databases
Apseudopsis latreillii	48.8236	-3.01936	#N/A	2016	#N/A	online databases
Apseudopsis latreillii	48.8254	-4.57108	#N/A	2019	#N/A	online databases
Apseudopsis latreillii	48.8326	-3.42524	#N/A	2011	#N/A	online databases
Apseudopsis latreillii	48.8359	-3.44351	#N/A	2011	#N/A	online databases
Apseudopsis latreillii	48.8758	-1.6112	10	2013	#N/A	online databases
Apseudopsis latreillii	48.9073	-1.77987	#N/A	2015	#N/A	online databases
Apseudopsis latreillii	48.9095	-1.77973	#N/A	2014	#N/A	online databases
Apseudopsis latreillii	48.9258	-1.80376	15	2013	#N/A	online databases
Apseudopsis latreillii	49.1364	-1.66226	#N/A	2011	#N/A	online databases
Apseudopsis latreillii	49.1627	-1.64998	#N/A	2011	#N/A	online databases
Apseudopsis latreillii	49.1634	-1.65067	#N/A	2014	#N/A	online databases
Apseudopsis latreillii	49.3342	-0.236	#N/A	2012	#N/A	online databases
Apseudopsis latreillii	49.3343	-0.23583	#N/A	2012	#N/A	online databases
Apseudopsis latreillii	49.3756	-0.25729	#N/A	2011	#N/A	online databases
Apseudopsis latreillii	49.4134	-1.0048	#N/A	2011	#N/A	online databases
Apseudopsis latreillii	49.4318	-0.05879	#N/A	2011	#N/A	online databases
Apseudopsis latreillii	49.4334	-1.04522	#N/A	2011	#N/A	online databases
Apseudopsis latreillii	49.4385	-0.23355	#N/A	2011	#N/A	online databases
Apseudopsis latreillii	49.4807	-2.44294	#N/A	1994	#N/A	online databases
Apseudopsis latreillii	49.4838	-2.58817	#N/A	1986	#N/A	online databases
Apseudopsis latreillii	49.4964	-1.12991	#N/A	2011	#N/A	online databases
Apseudopsis latreillii	49.5007	-2.54793	0	1994	#N/A	online databases
Apseudopsis latreillii	49.5007	-2.54793	#N/A	1994	#N/A	online databases
Apseudopsis latreillii	49.5607	-1.17872	#N/A	2011	#N/A	online databases
Apseudopsis latreillii	49.5743	-1.21947	#N/A	2011	#N/A	online databases
Apseudopsis latreillii	49.5767	-1.85396	5	2010	#N/A	online databases
Apseudopsis latreillii	49.5919	-1.22079	#N/A	2011	#N/A	online databases
Apseudopsis latreillii	49.6626	-1.59216	#N/A	#N/A	#N/A	online databases
Apseudopsis latreillii	49.6689	-1.60712	#N/A	2015	#N/A	online databases
Apseudopsis latreillii	49.6693	-1.57279	#N/A	#N/A	#N/A	online databases
Apseudopsis latreillii	49.6695	-1.60595	#N/A	2014	#N/A	online databases
Apseudopsis latreillii	49.67	-1.60932	9.4	2010	#N/A	online databases
Apseudopsis latreillii	49.67	-1.60932	9.6	2010	#N/A	online databases
Apseudopsis latreillii	49.67	-1.60932	9.7	2010	#N/A	online databases
Apseudopsis latreillii	49.67	-1.60932	#N/A	2012	#N/A	online databases
Apseudopsis latreillii	49.6701	-1.60917	#N/A	2015	#N/A	online databases
Apseudopsis latreillii	49.6703	-1.6083	10	2013	#N/A	online databases
Apseudopsis latreillii	49.6708	-1.60623	#N/A	2015	#N/A	online databases
Apseudopsis latreillii	49.6764	-1.70049	#N/A	2017	#N/A	online databases
Apseudopsis latreillii	49.6788	-1.50777	#N/A	2015	#N/A	online databases
Apseudopsis latreillii	49.6788	-1.50505	#N/A	2015	#N/A	online databases
Apseudopsis latreillii	49.6789	-1.50213	#N/A	2015	#N/A	online databases
Apseudopsis latreillii	49.679	-1.50508	20	2010	#N/A	online databases
Apseudopsis latreillii	49.679	-1.50508	#N/A	2012	#N/A	online databases
Apseudopsis latreillii	49.679	-1.50373	20	2013	#N/A	online databases
Apseudopsis latreillii	49.6855	-1.77246	#N/A	2011	#N/A	online databases
Apseudopsis latreillii	49.6972	-1.4939	#N/A	2011	#N/A	online databases
Apseudopsis latreillii	49.6999	-1.90324	#N/A	2018	#N/A	online databases
Apseudopsis latreillii	49.7036	-1.72111	#N/A	2016	#N/A	online databases
Apseudopsis latreillii	49.7146	-1.88376	#N/A	2011	#N/A	online databases
Apseudopsis latreillii	49.7247	-1.70528	#N/A	2016	#N/A	online databases
Apseudopsis latreillii	49.7258	-1.74833	#N/A	2016	#N/A	online databases
Apseudopsis latreillii	49.7264	-1.45026	#N/A	2011	#N/A	online databases
Apseudopsis latreillii	49.8692	-1.63083	#N/A	2016	#N/A	online databases
Apseudopsis latreillii	49.87	-1.58389	#N/A	2016	#N/A	online databases
Apseudopsis latreillii	49.8706	-1.53222	#N/A	2016	#N/A	online databases
Apseudopsis latreillii	49.8948	-6.35233	#N/A	2010	#N/A	online databases
Apseudopsis latreillii	49.9041	-6.33491	#N/A	1997	#N/A	online databases
Apseudopsis latreillii	49.9058	-6.28908	#N/A	2013	#N/A	online databases
Apseudopsis latreillii	49.9065	-6.34348	#N/A	1997	#N/A	online databases
Apseudopsis latreillii	49.9176	-6.33612	#N/A	1997	#N/A	online databases
Apseudopsis latreillii	49.9211	-6.33783	#N/A	2013	#N/A	online databases
Apseudopsis latreillii	49.9244	-6.27401	#N/A	1983	#N/A	online databases
Apseudopsis latreillii	49.9249	-6.33259	#N/A	2013	#N/A	online databases
Apseudopsis latreillii	49.9292	-6.31485	#N/A	1997	#N/A	online databases
Apseudopsis latreillii	49.9295	-6.33161	#N/A	1997	#N/A	online databases
Apseudopsis latreillii	49.9333	-6.27758	#N/A	2013	#N/A	online databases
Apseudopsis latreillii	49.9346	-6.31534	#N/A	1988	#N/A	online databases
Apseudopsis latreillii	49.935	-6.27913	#N/A	2013	#N/A	online databases
Apseudopsis latreillii	49.9355	1.05917	#N/A	2013	#N/A	online databases
Apseudopsis latreillii	49.9361	-6.27504	#N/A	2013	#N/A	online databases
Apseudopsis latreillii	49.9365	-6.33642	#N/A	1997	#N/A	online databases
Apseudopsis latreillii	49.9373	1.06292	#N/A	2015	#N/A	online databases
Apseudopsis latreillii	49.9402	-6.30887	#N/A	1997	#N/A	online databases
Apseudopsis latreillii	49.9403	-6.30609	#N/A	1997	#N/A	online databases
Apseudopsis latreillii	49.9421	-6.35505	#N/A	2013	#N/A	online databases
Apseudopsis latreillii	49.9431	-6.30355	#N/A	1983	#N/A	online databases
Apseudopsis latreillii	49.9433	-6.29799	#N/A	2013	#N/A	online databases
Apseudopsis latreillii	49.9435	-6.34123	#N/A	1988	#N/A	online databases
Apseudopsis latreillii	49.9441	-6.34826	#N/A	1997	#N/A	online databases
Apseudopsis latreillii	49.9464	-6.28711	#N/A	2013	#N/A	online databases
Apseudopsis latreillii	49.9485	-6.27893	#N/A	1997	#N/A	online databases
Apseudopsis latreillii	49.9486	-6.34867	#N/A	1997	#N/A	online databases
Apseudopsis latreillii	49.9488	-6.3445	#N/A	1997	#N/A	online databases
Apseudopsis latreillii	49.952	-6.30574	#N/A	1997	#N/A	online databases
Apseudopsis latreillii	49.9543	-6.29339	#N/A	2000	#N/A	online databases
Apseudopsis latreillii	49.9546	-6.30876	#N/A	1983	#N/A	online databases
Apseudopsis latreillii	49.9556	-6.25864	#N/A	1997	#N/A	online databases
Apseudopsis latreillii	49.9566	-6.30336	#N/A	2013	#N/A	online databases
Apseudopsis latreillii	49.9569	-6.27131	#N/A	1983	#N/A	online databases
Apseudopsis latreillii	49.957	-6.28417	#N/A	2010	#N/A	online databases
Apseudopsis latreillii	49.9572	-6.31039	#N/A	1997	#N/A	online databases
Apseudopsis latreillii	49.9574	-6.30622	#N/A	1997	#N/A	online databases
Apseudopsis latreillii	49.9602	-6.3274	#N/A	1983	#N/A	online databases
Apseudopsis latreillii	49.9603	-6.34833	#N/A	1988	#N/A	online databases
Apseudopsis latreillii	49.9615	-6.29403	#N/A	2000	#N/A	online databases
Apseudopsis latreillii	49.9661	-6.31398	#N/A	1997	#N/A	online databases
Apseudopsis latreillii	49.9664	-6.30563	#N/A	2013	#N/A	online databases
Apseudopsis latreillii	49.9668	-6.31962	#N/A	2013	#N/A	online databases
Apseudopsis latreillii	49.9675	-6.32387	#N/A	1983	#N/A	online databases
Apseudopsis latreillii	49.9701	-6.27945	#N/A	1997	#N/A	online databases
Apseudopsis latreillii	49.9719	-6.27961	#N/A	2013	#N/A	online databases
Apseudopsis latreillii	49.9729	-6.27691	#N/A	2013	#N/A	online databases
Apseudopsis latreillii	49.9737	-6.27977	#N/A	1988	#N/A	online databases
Apseudopsis latreillii	50.087	-5.0915	#N/A	1987	#N/A	online databases
Apseudopsis latreillii	50.0942	-5.09476	#N/A	2013	#N/A	online databases
Apseudopsis latreillii	50.0959	-5.09766	#N/A	2013	#N/A	online databases
Apseudopsis latreillii	50.096	-5.09487	#N/A	2013	#N/A	online databases
Apseudopsis latreillii	50.096	-5.09208	#N/A	2013	#N/A	online databases
Apseudopsis latreillii	50.0969	-5.09493	#N/A	2013	#N/A	online databases
Apseudopsis latreillii	50.0969	-5.09214	#N/A	2010	#N/A	online databases
Apseudopsis latreillii	50.0971	-5.12012	#N/A	1987	#N/A	online databases
Apseudopsis latreillii	50.0975	-5.13832	#N/A	1987	#N/A	online databases
Apseudopsis latreillii	50.0978	-5.12576	#N/A	1987	#N/A	online databases
Apseudopsis latreillii	50.0979	-5.12297	#N/A	1987	#N/A	online databases
Apseudopsis latreillii	50.1529	-5.01594	#N/A	1990	#N/A	online databases
Apseudopsis latreillii	50.1539	-5.04681	#N/A	1990	#N/A	online databases
Apseudopsis latreillii	50.1541	-5.00482	#N/A	1990	#N/A	online databases
Apseudopsis latreillii	50.1553	-5.02869	#N/A	1990	#N/A	online databases
Apseudopsis latreillii	50.1575	-5.04471	#N/A	2013	#N/A	online databases
Apseudopsis latreillii	50.1582	-5.05548	#N/A	2013	#N/A	online databases
Apseudopsis latreillii	50.1582	-5.04596	#N/A	2013	#N/A	online databases
Apseudopsis latreillii	50.1583	-5.04989	#N/A	2013	#N/A	online databases
Apseudopsis latreillii	50.1591	-5.05274	#N/A	2013	#N/A	online databases
Apseudopsis latreillii	50.1634	-5.02921	#N/A	1985	#N/A	online databases
Apseudopsis latreillii	50.1659	-4.99996	#N/A	1990	#N/A	online databases
Apseudopsis latreillii	50.1692	-5.04638	#N/A	1985	#N/A	online databases
Apseudopsis latreillii	50.1732	-5.03263	#N/A	2010	#N/A	online databases
Apseudopsis latreillii	50.1759	-5.0328	#N/A	2010	#N/A	online databases
Apseudopsis latreillii	50.1765	-5.04125	#N/A	2010	#N/A	online databases
Apseudopsis latreillii	50.1767	-5.03565	#N/A	2013	#N/A	online databases
Apseudopsis latreillii	50.1768	-5.03285	#N/A	2013	#N/A	online databases
Apseudopsis latreillii	50.1776	-5.03431	#N/A	2010	#N/A	online databases
Apseudopsis latreillii	50.1777	-5.03151	#N/A	2010	#N/A	online databases
Apseudopsis latreillii	50.1777	-5.03012	#N/A	2013	#N/A	online databases
Apseudopsis latreillii	50.1809	-5.04573	#N/A	2013	#N/A	online databases
Apseudopsis latreillii	50.181	-5.04293	#N/A	2010	#N/A	online databases
Apseudopsis latreillii	50.181	-5.04153	#N/A	2009	#N/A	online databases
Apseudopsis latreillii	50.1821	-5.0346	#N/A	2009	#N/A	online databases
Apseudopsis latreillii	50.1823	-5.0262	#N/A	2009	#N/A	online databases
Apseudopsis latreillii	50.183	-5.03465	#N/A	2013	#N/A	online databases
Apseudopsis latreillii	50.1832	-5.02766	#N/A	2013	#N/A	online databases
Apseudopsis latreillii	50.1846	-5.04316	#N/A	2013	#N/A	online databases
Apseudopsis latreillii	50.1864	-5.04327	#N/A	2013	#N/A	online databases
Apseudopsis latreillii	50.1867	-5.03208	#N/A	2013	#N/A	online databases
Apseudopsis latreillii	50.2252	-3.77966	#N/A	1985	#N/A	online databases
Apseudopsis latreillii	50.2298	-3.77282	#N/A	1985	#N/A	online databases
Apseudopsis latreillii	50.2325	-3.77152	#N/A	1990	#N/A	online databases
Apseudopsis latreillii	50.2353	-3.76601	#N/A	1985	#N/A	online databases
Apseudopsis latreillii	50.2372	-3.75907	#N/A	1985	#N/A	online databases
Apseudopsis latreillii	50.2417	-3.76064	#N/A	1985	#N/A	online databases
Apseudopsis latreillii	50.2435	-3.7593	#N/A	1985	#N/A	online databases
Apseudopsis latreillii	50.2435	-3.7579	#N/A	1990	#N/A	online databases
Apseudopsis latreillii	50.2489	-3.7595	#N/A	1985	#N/A	online databases
Apseudopsis latreillii	50.2498	-3.75673	#N/A	1990	#N/A	online databases
Apseudopsis latreillii	50.2525	-3.76104	#N/A	1985	#N/A	online databases
Apseudopsis latreillii	50.2997	-4.06047	#N/A	1998	#N/A	online databases
Apseudopsis latreillii	50.3004	-4.07033	#N/A	1998	#N/A	online databases
Apseudopsis latreillii	50.3087	-4.16198	#N/A	2011	#N/A	online databases
Apseudopsis latreillii	50.3087	-4.15917	#N/A	2011	#N/A	online databases
Apseudopsis latreillii	50.3094	-4.07353	#N/A	2011	#N/A	online databases
Apseudopsis latreillii	50.3096	-4.05949	#N/A	1999	#N/A	online databases
Apseudopsis latreillii	50.3098	-4.04967	#N/A	1999	#N/A	online databases
Apseudopsis latreillii	50.3104	-4.06935	#N/A	1998	#N/A	online databases
Apseudopsis latreillii	50.3114	-4.06097	#N/A	2011	#N/A	online databases
Apseudopsis latreillii	50.3202	-4.16953	#N/A	1999	#N/A	online databases
Apseudopsis latreillii	50.325	-4.15289	#N/A	2011	#N/A	online databases
Apseudopsis latreillii	50.3477	-4.14267	#N/A	2011	#N/A	online databases
Apseudopsis latreillii	50.3512	-4.14845	#N/A	2011	#N/A	online databases
Apseudopsis latreillii	50.3531	-4.14431	#N/A	2011	#N/A	online databases
Apseudopsis latreillii	50.3541	-4.62236	#N/A	1991	#N/A	online databases
Apseudopsis latreillii	50.3564	-4.15852	#N/A	1992	#N/A	online databases
Apseudopsis latreillii	50.3577	-4.1389	#N/A	1992	#N/A	online databases
Apseudopsis latreillii	50.3592	-4.15584	#N/A	1992	#N/A	online databases
Apseudopsis latreillii	50.3593	-4.14881	#N/A	1992	#N/A	online databases
Apseudopsis latreillii	50.3596	-4.17976	#N/A	1999	#N/A	online databases
Apseudopsis latreillii	50.36	-4.10948	#N/A	1999	#N/A	online databases
Apseudopsis latreillii	50.3603	-4.18963	#N/A	1999	#N/A	online databases
Apseudopsis latreillii	50.3648	-4.18984	#N/A	2011	#N/A	online databases
Apseudopsis latreillii	50.3659	-4.13224	#N/A	1990	#N/A	online databases
Apseudopsis latreillii	50.3837	-4.1893	#N/A	2011	#N/A	online databases
Apseudopsis latreillii	50.3854	-4.1936	#N/A	1992	#N/A	online databases
Apseudopsis latreillii	50.3889	-4.19939	#N/A	1992	#N/A	online databases
Apseudopsis latreillii	50.3901	-4.23181	#N/A	2011	#N/A	online databases
Apseudopsis latreillii	50.3911	-4.22482	#N/A	2011	#N/A	online databases
Apseudopsis latreillii	50.3915	-4.20373	#N/A	1992	#N/A	online databases
Apseudopsis latreillii	50.394	-4.21511	#N/A	2011	#N/A	online databases
Apseudopsis latreillii	50.4041	-4.20432	#N/A	1992	#N/A	online databases
Apseudopsis latreillii	50.406	-4.20159	#N/A	1992	#N/A	online databases
Apseudopsis latreillii	50.5797	-2.44978	#N/A	1995	#N/A	online databases
Apseudopsis latreillii	50.5859	-2.47951	#N/A	1995	#N/A	online databases
Apseudopsis latreillii	50.684	-1.97659	#N/A	1995	#N/A	online databases
Apseudopsis latreillii	50.684	-1.97518	#N/A	1995	#N/A	online databases
Apseudopsis latreillii	50.6849	-1.98084	#N/A	1995	#N/A	online databases
Apseudopsis latreillii	50.6858	-1.98367	#N/A	1995	#N/A	online databases
Apseudopsis latreillii	50.6858	-1.54627	#N/A	2014	#N/A	online databases
Apseudopsis latreillii	50.6929	-1.89164	#N/A	2013	#N/A	online databases
Apseudopsis latreillii	50.7	-3.2	#N/A	1967	1982.6	online databases
Apseudopsis latreillii	50.7802	-1.35245	#N/A	2013	#N/A	online databases
Apseudopsis latreillii	51.0556	1.26561	#N/A	2014	#N/A	online databases
Apseudopsis latreillii	51.1611	-4.65072	#N/A	1978	#N/A	online databases
Apseudopsis latreillii	51.306	2.598	#N/A	2011	6479789A-EA03-40B0-AB05-1382040D2B01	online databases
Apseudopsis latreillii	51.309	2.602	#N/A	2010	E1F34648-5923-4844-8790-6958E02362E8	online databases
Apseudopsis latreillii	51.6894	-5.11126	#N/A	1996	#N/A	online databases
Apseudopsis latreillii	51.7214	-5.22642	#N/A	1996	#N/A	online databases
Apseudopsis latreillii	51.738	-5.24643	#N/A	1996	#N/A	online databases
Apseudopsis latreillii	51.9377	-5.20991	#N/A	1996	#N/A	online databases
Apseudopsis latreillii	51.9491	-5.15687	#N/A	1996	#N/A	online databases
Apseudopsis latreillii	51.9615	-5.12717	#N/A	1996	#N/A	online databases
Apseudopsis latreillii	52.8295	-4.417	#N/A	2010	#N/A	online databases
Apseudopsis latreillii	52.8297	-4.4173	#N/A	2010	#N/A	online databases
Apseudopsis latreillii	60.9745	2.9983	295	1998	#N/A	online databases
Apseudopsis latreillii	60.975	3	#N/A	1998	Cr-16841	online databases
Apseudopsis latreillii	60.9915	3.63231	356	1998	#N/A	online databases
Apseudopsis latreillii	60.9917	3.6336	#N/A	1998	Cr-16836	online databases
Apseudopsis mediterraneus	32.8283	35.0209	#N/A	#N/A	#N/A	Bacescu, 1961
Apseudopsis mediterraneus	42.4861	3.13276	#N/A	#N/A	#N/A	Bacescu, 1961
Apseudopsis mediterraneus	43.7294	7.42568	#N/A	#N/A	#N/A	Bacescu, 1961
Apseudopsis mediterraneus	31.6916	34.5505	14.7	#N/A	#N/A	Bamber et al., 2009
Apseudopsis mediterraneus	32.4651	34.8698	15.8	#N/A	#N/A	Bamber et al., 2009
Apseudopsis mediterraneus	32.4745	34.8719	15.8	#N/A	#N/A	Bamber et al., 2009
Apseudopsis mediterraneus	32.456	34.8671	16.2	#N/A	#N/A	Bamber et al., 2009
Apseudopsis mediterraneus	31.8533	34.6583	5.2	#N/A	#N/A	Bamber et al., 2009
Apseudopsis mediterraneus	31.854	34.655	10	#N/A	#N/A	Bamber et al., 2009
Apseudopsis mediterraneus	31.8557	34.6508	11.8	#N/A	#N/A	Bamber et al., 2009
Apseudopsis mediterraneus	31.8574	34.6576	7.4	#N/A	#N/A	Bamber et al., 2009
Apseudopsis mediterraneus	31.8502	34.6499	10.1	#N/A	#N/A	Bamber et al., 2009
Apseudopsis mediterraneus	31.8605	34.6426	6.4	#N/A	#N/A	Bamber et al., 2009
Apseudopsis mediterraneus	31.8677	34.6358	21	#N/A	#N/A	Bamber et al., 2009
Apseudopsis mediterraneus	31.8741	34.6411	28.1	#N/A	#N/A	Bamber et al., 2009
Apseudopsis mediterraneus	31.8602	34.6531	27.2	#N/A	#N/A	Bamber et al., 2009
Apseudopsis mediterraneus	31.8551	34.6551	12	#N/A	#N/A	Bamber et al., 2009
Apseudopsis mediterraneus	31.8728	34.6429	8.7	#N/A	#N/A	Bamber et al., 2009
Apseudopsis mediterraneus	31.8517	34.6471	25.5	#N/A	#N/A	Bamber et al., 2009
Apseudopsis mediterraneus	31.8633	34.6511	13	#N/A	#N/A	Bamber et al., 2009
Apseudopsis mediterraneus	31.8775	34.6418	14	#N/A	#N/A	Bamber et al., 2009
Apseudopsis mediterraneus	37.0169	-7.749	#N/A	#N/A	#N/A	Carvalaho et al., 2019
Apseudopsis mediterraneus	34.367	10.2773	5.28	#N/A	#N/A	Esquete et al., 2019
Apseudopsis mediterraneus	34.3533	10.2771	7.43	#N/A	#N/A	Esquete et al., 2019
Apseudopsis mediterraneus	34.3462	10.2456	5.3	#N/A	#N/A	Esquete et al., 2019
Apseudopsis mediterraneus	34.6981	11.3191	4.1	#N/A	#N/A	Esquete et al., 2019
Apseudopsis mediterraneus	34.6903	11.3255	10.03	#N/A	#N/A	Esquete et al., 2019
Apseudopsis mediterraneus	34.341	10.2154	3.53	#N/A	#N/A	Esquete et al., 2019
Apseudopsis mediterraneus	34.3429	10.1982	2.83	#N/A	#N/A	Esquete et al., 2019
Apseudopsis mediterraneus	34.3285	10.1868	3.25	#N/A	#N/A	Esquete et al., 2019
Apseudopsis mediterraneus	34.3213	10.1641	6.08	#N/A	#N/A	Esquete et al., 2019
Apseudopsis mediterraneus	34.318	10.1481	7.63	#N/A	#N/A	Esquete et al., 2019
Apseudopsis mediterraneus	34.3097	10.1582	11.9	#N/A	#N/A	Esquete et al., 2019
Apseudopsis mediterraneus	34.3254	10.172	0.87	#N/A	#N/A	Esquete et al., 2019
Apseudopsis mediterraneus	31.689	34.555	8.9	#N/A	#N/A	Lubinevsky et al., 2022
Apseudopsis mediterraneus	31.803	34.624	11	#N/A	#N/A	Lubinevsky et al., 2022
Apseudopsis mediterraneus	31.8512	34.6493	13	#N/A	#N/A	Lubinevsky et al., 2022
Apseudopsis mediterraneus	31.862	34.6512	15	#N/A	#N/A	Lubinevsky et al., 2022
Apseudopsis mediterraneus	31.862	34.6512	15	#N/A	#N/A	Lubinevsky et al., 2022
Apseudopsis mediterraneus	31.8632	34.6442	23	#N/A	#N/A	Lubinevsky et al., 2022
Apseudopsis mediterraneus	31.8632	34.6442	23	#N/A	#N/A	Lubinevsky et al., 2022
Apseudopsis mediterraneus	31.8668	34.6544	15	#N/A	#N/A	Lubinevsky et al., 2022
Apseudopsis mediterraneus	31.8668	34.6544	15	#N/A	#N/A	Lubinevsky et al., 2022
Apseudopsis mediterraneus	31.8669	34.6417	27	#N/A	#N/A	Lubinevsky et al., 2022
Apseudopsis mediterraneus	31.8669	34.6417	27	#N/A	#N/A	Lubinevsky et al., 2022
Apseudopsis mediterraneus	31.8672	34.6469	22	#N/A	#N/A	Lubinevsky et al., 2022
Apseudopsis mediterraneus	31.8672	34.6469	22	#N/A	#N/A	Lubinevsky et al., 2022
Apseudopsis mediterraneus	31.8695	34.6467	24	#N/A	#N/A	Lubinevsky et al., 2022
Apseudopsis mediterraneus	31.8695	34.6467	24	#N/A	#N/A	Lubinevsky et al., 2022
Apseudopsis mediterraneus	31.8751	34.6459	27	#N/A	#N/A	Lubinevsky et al., 2022
Apseudopsis mediterraneus	31.8751	34.6459	27	#N/A	#N/A	Lubinevsky et al., 2022
Apseudopsis mediterraneus	31.8752	34.6511	22	#N/A	#N/A	Lubinevsky et al., 2022
Apseudopsis mediterraneus	31.8752	34.6511	22	#N/A	#N/A	Lubinevsky et al., 2022
Apseudopsis mediterraneus	31.8917	34.6595	22	#N/A	#N/A	Lubinevsky et al., 2022
Apseudopsis mediterraneus	31.8917	34.6595	22	#N/A	#N/A	Lubinevsky et al., 2022
Apseudopsis mediterraneus	31.928	34.69	11.4	#N/A	#N/A	Lubinevsky et al., 2022
Apseudopsis mediterraneus	31.9339	34.6834	19.3	#N/A	#N/A	Lubinevsky et al., 2022
Apseudopsis mediterraneus	31.9339	34.6834	19.3	#N/A	#N/A	Lubinevsky et al., 2022
Apseudopsis mediterraneus	31.9348	34.6841	17.1	#N/A	#N/A	Lubinevsky et al., 2022
Apseudopsis mediterraneus	31.9348	34.6852	16.4	#N/A	#N/A	Lubinevsky et al., 2022
Apseudopsis mediterraneus	31.9349	34.6837	19.14	#N/A	#N/A	Lubinevsky et al., 2022
Apseudopsis mediterraneus	31.9349	34.6837	19.14	#N/A	#N/A	Lubinevsky et al., 2022
Apseudopsis mediterraneus	31.9349	34.6836	19.14	#N/A	#N/A	Lubinevsky et al., 2022
Apseudopsis mediterraneus	31.935	34.6849	16.4	#N/A	#N/A	Lubinevsky et al., 2022
Apseudopsis mediterraneus	31.935	34.6864	19.3	#N/A	#N/A	Lubinevsky et al., 2022
Apseudopsis mediterraneus	31.935	34.6864	19.3	#N/A	#N/A	Lubinevsky et al., 2022
Apseudopsis mediterraneus	31.9351	34.6822	19.3	#N/A	#N/A	Lubinevsky et al., 2022
Apseudopsis mediterraneus	31.9351	34.6822	19.3	#N/A	#N/A	Lubinevsky et al., 2022
Apseudopsis mediterraneus	31.936	34.691	13.68	#N/A	#N/A	Lubinevsky et al., 2022
Apseudopsis mediterraneus	31.936	34.691	13.68	#N/A	#N/A	Lubinevsky et al., 2022
Apseudopsis mediterraneus	31.9361	34.6906	16.4	#N/A	#N/A	Lubinevsky et al., 2022
Apseudopsis mediterraneus	31.9362	34.6827	22.5	#N/A	#N/A	Lubinevsky et al., 2022
Apseudopsis mediterraneus	31.9362	34.6827	22.5	#N/A	#N/A	Lubinevsky et al., 2022
Apseudopsis mediterraneus	31.9362	34.6909	13.68	#N/A	#N/A	Lubinevsky et al., 2022
Apseudopsis mediterraneus	31.9363	34.6865	18.42	#N/A	#N/A	Lubinevsky et al., 2022
Apseudopsis mediterraneus	31.9363	34.6798	24.67	#N/A	#N/A	Lubinevsky et al., 2022
Apseudopsis mediterraneus	31.9364	34.6823	22.5	#N/A	#N/A	Lubinevsky et al., 2022
Apseudopsis mediterraneus	31.9364	34.6864	18.42	#N/A	#N/A	Lubinevsky et al., 2022
Apseudopsis mediterraneus	31.9365	34.6792	16.7	#N/A	#N/A	Lubinevsky et al., 2022
Apseudopsis mediterraneus	31.9366	34.6826	16.7	#N/A	#N/A	Lubinevsky et al., 2022
Apseudopsis mediterraneus	31.9369	34.6851	19.3	#N/A	#N/A	Lubinevsky et al., 2022
Apseudopsis mediterraneus	31.9369	34.6851	19.3	#N/A	#N/A	Lubinevsky et al., 2022
Apseudopsis mediterraneus	31.9378	34.6852	20.45	#N/A	#N/A	Lubinevsky et al., 2022
Apseudopsis mediterraneus	31.938	34.685	20.45	#N/A	#N/A	Lubinevsky et al., 2022
Apseudopsis mediterraneus	31.9381	34.6801	22.7	#N/A	#N/A	Lubinevsky et al., 2022
Apseudopsis mediterraneus	31.9382	34.6803	25.73	#N/A	#N/A	Lubinevsky et al., 2022
Apseudopsis mediterraneus	31.9382	34.6852	19.3	#N/A	#N/A	Lubinevsky et al., 2022
Apseudopsis mediterraneus	31.9382	34.6832	20	#N/A	#N/A	Lubinevsky et al., 2022
Apseudopsis mediterraneus	31.9383	34.6832	22.34	#N/A	#N/A	Lubinevsky et al., 2022
Apseudopsis mediterraneus	31.9385	34.68	25.73	#N/A	#N/A	Lubinevsky et al., 2022
Apseudopsis mediterraneus	31.9385	34.6814	19.3	#N/A	#N/A	Lubinevsky et al., 2022
Apseudopsis mediterraneus	31.9385	34.6814	19.3	#N/A	#N/A	Lubinevsky et al., 2022
Apseudopsis mediterraneus	31.9392	34.6861	19.3	#N/A	#N/A	Lubinevsky et al., 2022
Apseudopsis mediterraneus	31.9392	34.6861	19.3	#N/A	#N/A	Lubinevsky et al., 2022
Apseudopsis mediterraneus	31.9405	34.6862	20.75	#N/A	#N/A	Lubinevsky et al., 2022
Apseudopsis mediterraneus	31.9407	34.6862	20.75	#N/A	#N/A	Lubinevsky et al., 2022
Apseudopsis mediterraneus	31.9407	34.6864	20.48	#N/A	#N/A	Lubinevsky et al., 2022
Apseudopsis mediterraneus	31.9415	34.694	13.8	#N/A	#N/A	Lubinevsky et al., 2022
Apseudopsis mediterraneus	31.9418	34.6873	13.8	#N/A	#N/A	Lubinevsky et al., 2022
Apseudopsis mediterraneus	31.942	34.6893	13.8	#N/A	#N/A	Lubinevsky et al., 2022
Apseudopsis mediterraneus	31.942	34.6875	16.3	#N/A	#N/A	Lubinevsky et al., 2022
Apseudopsis mediterraneus	31.9425	34.6551	35	#N/A	#N/A	Lubinevsky et al., 2022
Apseudopsis mediterraneus	31.9432	34.6862	13.8	#N/A	#N/A	Lubinevsky et al., 2022
Apseudopsis mediterraneus	31.9435	34.6883	13.8	#N/A	#N/A	Lubinevsky et al., 2022
Apseudopsis mediterraneus	31.9457	34.6845	13.8	#N/A	#N/A	Lubinevsky et al., 2022
Apseudopsis mediterraneus	31.9458	34.6895	13.8	#N/A	#N/A	Lubinevsky et al., 2022
Apseudopsis mediterraneus	31.9533	34.693	17.8	#N/A	#N/A	Lubinevsky et al., 2022
Apseudopsis mediterraneus	31.9535	34.6931	19.56	#N/A	#N/A	Lubinevsky et al., 2022
Apseudopsis mediterraneus	31.9535	34.6933	20.43	#N/A	#N/A	Lubinevsky et al., 2022
Apseudopsis mediterraneus	31.9536	34.693	20.43	#N/A	#N/A	Lubinevsky et al., 2022
Apseudopsis mediterraneus	31.9798	34.68	34	#N/A	#N/A	Lubinevsky et al., 2022
Apseudopsis mediterraneus	32.108	34.765	11.8	#N/A	#N/A	Lubinevsky et al., 2022
Apseudopsis mediterraneus	32.159	34.787	10.2	#N/A	#N/A	Lubinevsky et al., 2022
Apseudopsis mediterraneus	32.273	34.823	9.7	#N/A	#N/A	Lubinevsky et al., 2022
Apseudopsis mediterraneus	32.4	34.856	12.6	#N/A	#N/A	Lubinevsky et al., 2022
Apseudopsis mediterraneus	32.4483	34.8566	24.9	#N/A	#N/A	Lubinevsky et al., 2022
Apseudopsis mediterraneus	32.46	34.8612	0	#N/A	#N/A	Lubinevsky et al., 2022
Apseudopsis mediterraneus	32.4648	34.8559	0	#N/A	#N/A	Lubinevsky et al., 2022
Apseudopsis mediterraneus	32.4651	34.8511	35.2	#N/A	#N/A	Lubinevsky et al., 2022
Apseudopsis mediterraneus	32.4654	34.8644	0	#N/A	#N/A	Lubinevsky et al., 2022
Apseudopsis mediterraneus	32.4661	34.8596	0	#N/A	#N/A	Lubinevsky et al., 2022
Apseudopsis mediterraneus	32.545	34.895	12.5	#N/A	#N/A	Lubinevsky et al., 2022
Apseudopsis mediterraneus	32.789	34.948	9.7	#N/A	#N/A	Lubinevsky et al., 2022
Apseudopsis mediterraneus	32.821	35.02	11.25	#N/A	#N/A	Lubinevsky et al., 2022
Apseudopsis mediterraneus	32.832	35.042	9.3	#N/A	#N/A	Lubinevsky et al., 2022
Apseudopsis mediterraneus	32.8381	35.0239	16.3	#N/A	#N/A	Lubinevsky et al., 2022
Apseudopsis mediterraneus	32.8918	35.0656	15	#N/A	#N/A	Lubinevsky et al., 2022
Apseudopsis mediterraneus	32.8962	35.0652	15	#N/A	#N/A	Lubinevsky et al., 2022
Apseudopsis mediterraneus	32.9006	35.0653	9.8	#N/A	#N/A	Lubinevsky et al., 2022
Apseudopsis mediterraneus	32.901	35.073	9.2	#N/A	#N/A	Lubinevsky et al., 2022
Apseudopsis mediterraneus	32.9091	35.0682	10.5	#N/A	#N/A	Lubinevsky et al., 2022
Apseudopsis mediterraneus	32.918	35.073	6.6	#N/A	#N/A	Lubinevsky et al., 2022
Apseudopsis mediterraneus	32.9328	34.9828	30.7	#N/A	#N/A	Lubinevsky et al., 2022
Apseudopsis mediterraneus	39.9594	23.9217	#N/A	#N/A	#N/A	Voultsiadou et al., 2007
Apseudopsis mediterraneus	35.3441	25.1368	3.7	2012	Benth_MapMed_41137	online databases
Apseudopsis mediterraneus	35.3443	25.1487	10.5	2012	Benth_MapMed_41148	online databases
Apseudopsis mediterraneus	35.346	25.1454	19.5	2012	Benth_MapMed_41122	online databases
Apseudopsis mediterraneus	35.8928	10.6014	3.2	2012	Benth_MapMed_41204	online databases
Apseudopsis mediterraneus	39.2005	9.11256	11.4	2012	Benth_MapMed_41114	online databases
Apseudopsis mediterraneus	39.2064	9.12131	4.5	2012	Benth_MapMed_41100	online databases
Apseudopsis mediterraneus	35.3441	25.1368	3.7	2012	Benth_MapMed_41116	online databases
Apseudopsis mediterraneus	35.3443	25.1487	10.5	2012	Benth_MapMed_41126	online databases
Apseudopsis mediterraneus	35.346	25.1454	19.5	2012	Benth_MapMed_41121	online databases
Apseudopsis mediterraneus	35.8928	10.6014	3.2	2012	Benth_MapMed_41190	online databases
Apseudopsis mediterraneus	39.2005	9.11256	11.4	2012	Benth_MapMed_41088	online databases
Apseudopsis mediterraneus	39.2064	9.12131	4.5	2012	Benth_MapMed_41100	online databases
Apseudopsis minimus	32.8307	34.9535	#N/A	#N/A	#N/A	Gutu, 2002
Apseudopsis minimus	31.689	34.555	8.9	#N/A	#N/A	Lubinevsky et al., 2022
Apseudopsis minimus	31.8632	34.6442	23	#N/A	#N/A	Lubinevsky et al., 2022
Apseudopsis minimus	31.8632	34.6442	23	#N/A	#N/A	Lubinevsky et al., 2022
Apseudopsis minimus	31.8669	34.6417	27	#N/A	#N/A	Lubinevsky et al., 2022
Apseudopsis minimus	31.8669	34.6417	27	#N/A	#N/A	Lubinevsky et al., 2022
Apseudopsis minimus	31.8672	34.6469	22	#N/A	#N/A	Lubinevsky et al., 2022
Apseudopsis minimus	31.8695	34.6467	24	#N/A	#N/A	Lubinevsky et al., 2022
Apseudopsis minimus	31.8695	34.6467	24	#N/A	#N/A	Lubinevsky et al., 2022
Apseudopsis minimus	31.8751	34.6459	27	#N/A	#N/A	Lubinevsky et al., 2022
Apseudopsis minimus	31.8751	34.6459	27	#N/A	#N/A	Lubinevsky et al., 2022
Apseudopsis minimus	31.8752	34.6511	22	#N/A	#N/A	Lubinevsky et al., 2022
Apseudopsis minimus	31.8752	34.6511	22	#N/A	#N/A	Lubinevsky et al., 2022
Apseudopsis minimus	31.8917	34.6595	22	#N/A	#N/A	Lubinevsky et al., 2022
Apseudopsis minimus	31.8917	34.6595	22	#N/A	#N/A	Lubinevsky et al., 2022
Apseudopsis minimus	31.9339	34.6834	19.3	#N/A	#N/A	Lubinevsky et al., 2022
Apseudopsis minimus	31.9349	34.6837	19.14	#N/A	#N/A	Lubinevsky et al., 2022
Apseudopsis minimus	31.935	34.6864	19.3	#N/A	#N/A	Lubinevsky et al., 2022
Apseudopsis minimus	31.9351	34.6822	19.3	#N/A	#N/A	Lubinevsky et al., 2022
Apseudopsis minimus	31.9362	34.6827	22.5	#N/A	#N/A	Lubinevsky et al., 2022
Apseudopsis minimus	31.9362	34.6827	22.5	#N/A	#N/A	Lubinevsky et al., 2022
Apseudopsis minimus	31.9369	34.6851	19.3	#N/A	#N/A	Lubinevsky et al., 2022
Apseudopsis minimus	31.9385	34.6814	19.3	#N/A	#N/A	Lubinevsky et al., 2022
Apseudopsis minimus	31.9385	34.6814	19.3	#N/A	#N/A	Lubinevsky et al., 2022
Apseudopsis minimus	31.9392	34.6861	19.3	#N/A	#N/A	Lubinevsky et al., 2022
Apseudopsis minimus	31.9418	34.6853	13.8	#N/A	#N/A	Lubinevsky et al., 2022
Apseudopsis minimus	31.942	34.6893	13.8	#N/A	#N/A	Lubinevsky et al., 2022
Apseudopsis minimus	31.942	34.6875	16.3	#N/A	#N/A	Lubinevsky et al., 2022
Apseudopsis minimus	31.9432	34.6862	13.8	#N/A	#N/A	Lubinevsky et al., 2022
Apseudopsis minimus	31.9435	34.6883	13.8	#N/A	#N/A	Lubinevsky et al., 2022
Apseudopsis minimus	31.9457	34.6845	13.8	#N/A	#N/A	Lubinevsky et al., 2022
Apseudopsis minimus	31.9458	34.6895	13.8	#N/A	#N/A	Lubinevsky et al., 2022
Apseudopsis minimus	31.9535	34.6933	20.43	#N/A	#N/A	Lubinevsky et al., 2022
Apseudopsis minimus	32.4483	34.8566	24.9	#N/A	#N/A	Lubinevsky et al., 2022
Apseudopsis minimus	32.4651	34.8511	35.2	#N/A	#N/A	Lubinevsky et al., 2022
Apseudopsis minimus	32.8962	35.0652	15	#N/A	#N/A	Lubinevsky et al., 2022
Apseudopsis minimus	32.9006	35.0653	9.8	#N/A	#N/A	Lubinevsky et al., 2022
Apseudopsis minimus	32.9328	34.9828	30.7	#N/A	#N/A	Lubinevsky et al., 2022
Apseudopsis minimus	34.9271	32.9402	54	#N/A	#N/A	Lubinevsky et al., 2022
Apseudopsis olimpiae	27.3017	-83.2079	33	#N/A	Spp-56-010_B2	online databases
Apseudopsis olimpiae	28.6638	-84.4765	44.2	#N/A	#N/A	online databases
Apseudopsis olimpiae	28.7023	-84.5806	47.3	#N/A	#N/A	online databases
Apseudopsis olimpiae	28.7548	-80.069	88	#N/A	#N/A	online databases
Apseudopsis olimpiae	29.1822	-80.1506	86	#N/A	#N/A	online databases
Apseudopsis olimpiae	29.2169	-85.0003	27	1975	310679.2523	online databases
Apseudopsis olimpiae	29.3504	-85.6979	51.4	#N/A	#N/A	online databases
Apseudopsis olimpiae	29.4355	-84.4803	26	#N/A	#N/A	online databases
Apseudopsis olimpiae	29.4415	-87.7086	73	#N/A	#N/A	online databases
Apseudopsis olimpiae	29.482	-80.376	40	#N/A	#N/A	online databases
Apseudopsis olimpiae	29.5679	-87.5201	68	#N/A	#N/A	online databases
Apseudopsis olimpiae	29.7575	-86.0142	120	1974	310680.2523	online databases
Apseudopsis olimpiae	29.7935	-86.0503	43	#N/A	#N/A	online databases
Apseudopsis olimpiae	29.9834	-85.7519	25	#N/A	#N/A	online databases
Apseudopsis olimpiae	30.1831	-85.8988	21	#N/A	#N/A	online databases
Apseudopsis olimpiae	30.2326	-81.1468	21	#N/A	#N/A	online databases
Apseudopsis olimpiae	30.2504	-86.6694	33	#N/A	Spp-56-010_A2	online databases
Apseudopsis olimpiae	30.3818	-80.2181	65	#N/A	#N/A	online databases
Apseudopsis olimpiae	30.3831	-80.85	29	1977	232977.1851	online databases
Apseudopsis olimpiae	30.3844	-80.4342	38	1977	174735.1315	online databases
Apseudopsis olimpiae	30.3844	-80.4339	38	1977	174739.1315	online databases
Apseudopsis olimpiae	30.7911	-80.9065	25	#N/A	#N/A	online databases
Apseudopsis olimpiae	31.0094	-80.6416	25	#N/A	#N/A	online databases
Apseudopsis olimpiae	31.0167	-80.2817	39	1977	232975.1851	online databases
Apseudopsis olimpiae	31.3579	-80.8977	17.5	#N/A	#N/A	online databases
Apseudopsis olimpiae	31.3654	-80.891	18.9	#N/A	#N/A	online databases
Apseudopsis olimpiae	31.3657	-80.8687	18.4	#N/A	#N/A	online databases
Apseudopsis olimpiae	31.3677	-80.8978	18.5	#N/A	#N/A	online databases
Apseudopsis olimpiae	31.3677	-80.8973	17	#N/A	#N/A	online databases
Apseudopsis olimpiae	31.3713	-80.8882	18.1	#N/A	#N/A	online databases
Apseudopsis olimpiae	31.3725	-80.8452	16.8	#N/A	#N/A	online databases
Apseudopsis olimpiae	31.3727	-80.8713	19.4	#N/A	#N/A	online databases
Apseudopsis olimpiae	31.3729	-80.8442	18.9	#N/A	#N/A	online databases
Apseudopsis olimpiae	31.3742	-80.8563	17.7	#N/A	#N/A	online databases
Apseudopsis olimpiae	31.3768	-80.9184	15.2	#N/A	#N/A	online databases
Apseudopsis olimpiae	31.3776	-80.8544	16.8	#N/A	#N/A	online databases
Apseudopsis olimpiae	31.3785	-80.9189	17.3	#N/A	#N/A	online databases
Apseudopsis olimpiae	31.3798	-80.8828	20.7	#N/A	#N/A	online databases
Apseudopsis olimpiae	31.3803	-80.844	18.5	#N/A	#N/A	online databases
Apseudopsis olimpiae	31.3829	-80.8585	19.3	#N/A	#N/A	online databases
Apseudopsis olimpiae	31.3832	-80.8588	18.1	#N/A	#N/A	online databases
Apseudopsis olimpiae	31.3882	-80.8522	19.6	#N/A	#N/A	online databases
Apseudopsis olimpiae	31.3989	-80.8582	15.2	#N/A	#N/A	online databases
Apseudopsis olimpiae	31.3989	-80.8313	16.5	#N/A	#N/A	online databases
Apseudopsis olimpiae	31.4055	-80.832	18	#N/A	#N/A	online databases
Apseudopsis olimpiae	31.4056	-80.8231	21	#N/A	#N/A	online databases
Apseudopsis olimpiae	31.4057	-80.832	18.9	#N/A	#N/A	online databases
Apseudopsis olimpiae	31.4058	-80.8328	19	#N/A	#N/A	online databases
Apseudopsis olimpiae	31.4107	-80.8586	20.8	#N/A	#N/A	online databases
Apseudopsis olimpiae	31.4126	-80.8455	21.9	#N/A	#N/A	online databases
Apseudopsis olimpiae	31.4127	-80.8944	18.4	#N/A	#N/A	online databases
Apseudopsis olimpiae	31.4133	-80.8478	21.9	#N/A	#N/A	online databases
Apseudopsis olimpiae	31.4154	-80.8381	21.1	#N/A	#N/A	online databases
Apseudopsis olimpiae	31.416	-80.8876	19.3	#N/A	#N/A	online databases
Apseudopsis olimpiae	31.4176	-80.8552	19.1	#N/A	#N/A	online databases
Apseudopsis olimpiae	31.4192	-80.8677	21	#N/A	#N/A	online databases
Apseudopsis olimpiae	31.4192	-80.867	19.4	#N/A	#N/A	online databases
Apseudopsis olimpiae	31.4253	-80.8668	20.5	#N/A	#N/A	online databases
Apseudopsis olimpiae	31.5006	-80.3898	29	#N/A	#N/A	online databases
Apseudopsis olimpiae	31.5198	-80.5895	23.2	#N/A	#N/A	online databases
Apseudopsis olimpiae	31.5333	-79.74	58	1981	115	online databases
Apseudopsis olimpiae	31.535	-79.7367	58	1981	225232.1784	online databases
Apseudopsis olimpiae	31.5379	-80.3394	30.1	#N/A	#N/A	online databases
Apseudopsis olimpiae	31.5526	-80.0902	34.1	#N/A	#N/A	online databases
Apseudopsis olimpiae	31.5663	-79.8389	43.5	#N/A	#N/A	online databases
Apseudopsis olimpiae	31.5776	-79.711	60	#N/A	#N/A	online databases
Apseudopsis olimpiae	31.685	-80.345	28	1981	225235.1784	online databases
Apseudopsis olimpiae	31.9292	-79.8614	35	#N/A	#N/A	online databases
Apseudopsis olimpiae	32.0831	-79.6328	39	1977	174737.1315	online databases
Apseudopsis olimpiae	32.2167	-79.8675	20	1977	232974.1851	online databases
Apseudopsis olimpiae	32.2169	-79.8672	24	1977	232973.1851	online databases
Apseudopsis olimpiae	32.2721	-79.3433	41	#N/A	#N/A	online databases
Apseudopsis olimpiae	32.7083	-79.86	12.5	1978	103	online databases
Apseudopsis olimpiae	32.7142	-78.8652	33	#N/A	#N/A	online databases
Apseudopsis olimpiae	32.825	-78.6633	34	1981	225238.1784	online databases
Apseudopsis olimpiae	32.825	-78.6633	34	1981	118	online databases
Apseudopsis olimpiae	32.8339	-79.0664	22.5	1977	174740.1315	online databases
Apseudopsis olimpiae	32.8766	-78.6101	43	#N/A	#N/A	online databases
Apseudopsis olimpiae	33.486	-77.9256	28	#N/A	#N/A	online databases
Apseudopsis olimpiae	33.5417	-77.4167	30	1981	224082.1772	online databases
Apseudopsis olimpiae	34.0979	-77.3978	26	#N/A	#N/A	online databases
Apseudopsis olimpiae	34.9885	-75.5628	37	#N/A	#N/A	online databases
Apseudopsis olimpiae	29.6169	-84.2834	19	#N/A	#N/A	Hansknecht and Heard, 2001
Apseudopsis olimpiae	29.4987	-84.4504	24	#N/A	#N/A	Hansknecht and Heard, 2001
Apseudopsis olimpiae	29.3334	-84.734	30	#N/A	#N/A	Hansknecht and Heard, 2001
Apseudopsis olimpiae	29.2169	-85.0004	28	#N/A	#N/A	Hansknecht and Heard, 2001
Apseudopsis olimpiae	29.9331	-86.108	39	#N/A	#N/A	Hansknecht and Heard, 2001
Apseudopsis olimpiae	29.4	-85.7006	42	#N/A	#N/A	Hansknecht and Heard, 2001
Apseudopsis olimpiae	29.7575	-86.0142	37	#N/A	#N/A	Hansknecht and Heard, 2001
Apseudopsis olimpiae	29.6747	-8.01361	37	#N/A	#N/A	Hansknecht and Heard, 2001
Apseudopsis olimpiae	28.3167	-84.3494	47	#N/A	#N/A	Hansknecht and Heard, 2001
Apseudopsis olimpiae	27.8336	-83.5164	34	#N/A	#N/A	Hansknecht and Heard, 2001
Apseudopsis olimpiae	29.9898	-87.4862	27	#N/A	#N/A	Hansknecht and Heard, 2001
Apseudopsis olimpiae	30.0075	-87.5547	29	#N/A	#N/A	Hansknecht and Heard, 2001
Apseudopsis olimpiae	30.1485	-87.3008	25	#N/A	#N/A	Hansknecht and Heard, 2001
Apseudopsis olimpiae	30.15	-87.2832	23	#N/A	#N/A	Hansknecht and Heard, 2001
Apseudopsis olimpiae	30.1083	-87.299	23	#N/A	#N/A	Hansknecht and Heard, 2001
Apseudopsis olimpiae	28.6638	-84.4765	44.2	2010	#N/A	online databases
Apseudopsis olimpiae	28.7023	-84.5806	47.3	2010	#N/A	online databases
Apseudopsis olimpiae	28.7548	-80.069	88	2011	#N/A	online databases
Apseudopsis olimpiae	29.1822	-80.1506	86	2011	#N/A	online databases
Apseudopsis olimpiae	29.2169	-85.0003	27	1977	USNM 310679	online databases
Apseudopsis olimpiae	29.3504	-85.6979	51.4	2010	#N/A	online databases
Apseudopsis olimpiae	29.4355	-84.4803	26	2010	#N/A	online databases
Apseudopsis olimpiae	29.4415	-87.7086	73	2010	#N/A	online databases
Apseudopsis olimpiae	29.482	-80.376	40	2004	#N/A	online databases
Apseudopsis olimpiae	29.5679	-87.5201	68	2010	#N/A	online databases
Apseudopsis olimpiae	29.7575	-86.0142	120	1974	USNM 310682	online databases
Apseudopsis olimpiae	29.7935	-86.0503	43	2010	#N/A	online databases
Apseudopsis olimpiae	29.9834	-85.7519	25	2010	#N/A	online databases
Apseudopsis olimpiae	30.1831	-85.8988	21	2010	#N/A	online databases
Apseudopsis olimpiae	30.2326	-81.1468	21	2004	#N/A	online databases
Apseudopsis olimpiae	30.3818	-80.2181	65	2011	#N/A	online databases
Apseudopsis olimpiae	30.3831	-80.85	29	1977	USNM 232977	online databases
Apseudopsis olimpiae	30.3844	-80.4342	38	1977	USNM 174735	online databases
Apseudopsis olimpiae	30.3844	-80.4339	38	1977	USNM 174739	online databases
Apseudopsis olimpiae	30.7911	-80.9065	25	2004	#N/A	online databases
Apseudopsis olimpiae	31.0094	-80.6416	25	2004	#N/A	online databases
Apseudopsis olimpiae	31.0167	-80.2817	39	1977	USNM 232975	online databases
Apseudopsis olimpiae	31.3579	-80.8977	17.5	2003	#N/A	online databases
Apseudopsis olimpiae	31.3654	-80.891	18.9	2012	#N/A	online databases
Apseudopsis olimpiae	31.3657	-80.8687	18.4	2005	#N/A	online databases
Apseudopsis olimpiae	31.3677	-80.8978	18.5	2002	#N/A	online databases
Apseudopsis olimpiae	31.3677	-80.8973	17	2001	#N/A	online databases
Apseudopsis olimpiae	31.3713	-80.8882	18.1	2005	#N/A	online databases
Apseudopsis olimpiae	31.3725	-80.8452	16.8	2013	#N/A	online databases
Apseudopsis olimpiae	31.3727	-80.8713	19.4	2012	#N/A	online databases
Apseudopsis olimpiae	31.3729	-80.8442	18.9	2005	#N/A	online databases
Apseudopsis olimpiae	31.3742	-80.8563	17.7	2005	#N/A	online databases
Apseudopsis olimpiae	31.3768	-80.9184	15.2	2000	#N/A	online databases
Apseudopsis olimpiae	31.3776	-80.8544	16.8	2013	#N/A	online databases
Apseudopsis olimpiae	31.3785	-80.9189	17.3	2005	#N/A	online databases
Apseudopsis olimpiae	31.3798	-80.8828	20.7	2005	#N/A	online databases
Apseudopsis olimpiae	31.3803	-80.844	18.5	2005	#N/A	online databases
Apseudopsis olimpiae	31.3829	-80.8585	19.3	2000	#N/A	online databases
Apseudopsis olimpiae	31.3832	-80.8588	18.1	2001	#N/A	online databases
Apseudopsis olimpiae	31.3882	-80.8522	19.6	2005	#N/A	online databases
Apseudopsis olimpiae	31.3989	-80.8582	15.2	2013	#N/A	online databases
Apseudopsis olimpiae	31.3989	-80.8313	16.5	2013	#N/A	online databases
Apseudopsis olimpiae	31.4055	-80.832	18	2001	#N/A	online databases
Apseudopsis olimpiae	31.4056	-80.8231	21	2003	#N/A	online databases
Apseudopsis olimpiae	31.4057	-80.832	18.9	2002	#N/A	online databases
Apseudopsis olimpiae	31.4058	-80.8328	19	2000	#N/A	online databases
Apseudopsis olimpiae	31.4107	-80.8586	20.8	2000	#N/A	online databases
Apseudopsis olimpiae	31.4126	-80.8455	21.9	2005	#N/A	online databases
Apseudopsis olimpiae	31.4127	-80.8944	18.4	2005	#N/A	online databases
Apseudopsis olimpiae	31.4133	-80.8478	21.9	2005	#N/A	online databases
Apseudopsis olimpiae	31.4154	-80.8381	21.1	2000	#N/A	online databases
Apseudopsis olimpiae	31.416	-80.8876	19.3	2000	103621	online databases
Apseudopsis olimpiae	31.4176	-80.8552	19.1	2013	#N/A	online databases
Apseudopsis olimpiae	31.4192	-80.8677	21	2005	#N/A	online databases
Apseudopsis olimpiae	31.4192	-80.867	19.4	2000	#N/A	online databases
Apseudopsis olimpiae	31.4253	-80.8668	20.5	2003	#N/A	online databases
Apseudopsis olimpiae	31.5006	-80.3898	29	2004	#N/A	online databases
Apseudopsis olimpiae	31.5198	-80.5895	23.2	2002	#N/A	online databases
Apseudopsis olimpiae	31.5333	-79.74	58	1981	110114	online databases
Apseudopsis olimpiae	31.535	-79.7367	58	1981	USNM 225232	online databases
Apseudopsis olimpiae	31.5379	-80.3394	30.1	2002	#N/A	online databases
Apseudopsis olimpiae	31.5526	-80.0902	34.1	2002	#N/A	online databases
Apseudopsis olimpiae	31.5663	-79.8389	43.5	2002	#N/A	online databases
Apseudopsis olimpiae	31.5776	-79.711	60	2004	#N/A	online databases
Apseudopsis olimpiae	31.685	-80.345	28	1981	USNM 225235	online databases
Apseudopsis olimpiae	31.9292	-79.8614	35	2004	#N/A	online databases
Apseudopsis olimpiae	32.0831	-79.6328	39	1977	USNM 174737	online databases
Apseudopsis olimpiae	32.2167	-79.8675	20	1977	USNM 232974	online databases
Apseudopsis olimpiae	32.2169	-79.8672	24	1977	USNM 232973	online databases
Apseudopsis olimpiae	32.2721	-79.3433	41	2004	103622	online databases
Apseudopsis olimpiae	32.7083	-79.86	12.5	1978	110102	online databases
Apseudopsis olimpiae	32.7142	-78.8652	33	2004	#N/A	online databases
Apseudopsis olimpiae	32.825	-78.6633	34	1981	110117	online databases
Apseudopsis olimpiae	32.825	-78.6633	34	1981	USNM 225238	online databases
Apseudopsis olimpiae	32.8339	-79.0664	22.5	1977	USNM 174740	online databases
Apseudopsis olimpiae	32.8766	-78.6101	43	2004	#N/A	online databases
Apseudopsis olimpiae	33.486	-77.9256	28	2004	#N/A	online databases
Apseudopsis olimpiae	33.5417	-77.4167	30	1981	USNM 224082	online databases
Apseudopsis olimpiae	34.0979	-77.3978	26	2004	#N/A	online databases
Apseudopsis olimpiae	34.9885	-75.5628	37	2004	#N/A	online databases
Apseudopsis opisthoscolops	4.675	114.442	#N/A	#N/A	#N/A	Bamber et al., 2012
Apseudopsis opisthoscolops	4.93333	115.017	#N/A	#N/A	#N/A	Bamber et al., 2012
Apseudopsis opisthoscolops	4.70736	114.434	11.5	#N/A	#N/A	Bamber, 2013
Apseudopsis opisthoscolops	4.68694	114.456	6.5	#N/A	#N/A	Bamber, 2013
Apseudopsis opisthoscolops	4.69167	114.454	#N/A	#N/A	#N/A	Bamber, 2013
Apseudopsis ostroumovi	41.62	28.15	50	2005	GeoEcoMar_BlackSeaCruises_2003_2011_2180	online databases
Apseudopsis ostroumovi	41.68	28.31	66	2005	GeoEcoMar_BlackSeaCruises_2003_2011_2181	online databases
Apseudopsis ostroumovi	41.73	28.44	65	2005	GeoEcoMar_BlackSeaCruises_2003_2011_2182	online databases
Apseudopsis ostroumovi	42.15	28.2	75	1967	BlackSea-MacroB_Bul-669	online databases
Apseudopsis ostroumovi	42.33	28.16	60	2005	GeoEcoMar_BlackSeaCruises_2003_2011_2185	online databases
Apseudopsis ostroumovi	42.33	28.33	91	2005	GeoEcoMar_BlackSeaCruises_2003_2011_2186	online databases
Apseudopsis ostroumovi	42.45	27.95	43	2003	GeoEcoMar_BlackSeaCruises_2003_2011_319	online databases
Apseudopsis ostroumovi	42.47	28.08	64	2003	GeoEcoMar_BlackSeaCruises_2003_2011_320	online databases
Apseudopsis ostroumovi	43.03	28.28	91	2003	GeoEcoMar_BlackSeaCruises_2003_2011_318	online databases
Apseudopsis ostroumovi	43.06	28.38	71	2003	GeoEcoMar_BlackSeaCruises_2003_2011_317	online databases
Apseudopsis ostroumovi	43.07	28.27	30	2005	GeoEcoMar_BlackSeaCruises_2003_2011_2183	online databases
Apseudopsis ostroumovi	43.09	28.22	33	2005	GeoEcoMar_BlackSeaCruises_2003_2011_2184	online databases
Apseudopsis ostroumovi	43.09	28.23	35	2003	GeoEcoMar_BlackSeaCruises_2003_2011_316	online databases
Apseudopsis ostroumovi	43.18	28.69	91	2003	GeoEcoMar_BlackSeaCruises_2003_2011_322	online databases
Apseudopsis ostroumovi	43.25	28.23	17	1967	BlackSea-MacroB_Bul-676	online databases
Apseudopsis ostroumovi	43.27	28.53	63	2003	GeoEcoMar_BlackSeaCruises_2003_2011_321	online databases
Apseudopsis ostroumovi	43.7487	28.7989	52	1997	GeoEcoMar_Ro/Uk-BlackSea-1997_196	online databases
Apseudopsis ostroumovi	43.76	29.4	67	2011	GeoEcoMar_BlackSeaCruises_2003_2011_4007	online databases
Apseudopsis ostroumovi	43.76	30.06	110	2003	GeoEcoMar_BlackSeaCruises_2003_2011_325	online databases
Apseudopsis ostroumovi	43.77	28.73	41.09	2010	GeoEcoMar_BlackSeaCruises_2003_2011_4000	online databases
Apseudopsis ostroumovi	43.77	28.73	45	2011	GeoEcoMar_BlackSeaCruises_2003_2011_4008	online databases
Apseudopsis ostroumovi	43.79	29.99	90	2003	GeoEcoMar_BlackSeaCruises_2003_2011_324	online databases
Apseudopsis ostroumovi	43.7959	29.4611	71	1997	GeoEcoMar_Ro/Uk-BlackSea-1997_291	online databases
Apseudopsis ostroumovi	43.84	29.5	68.7	2007	GeoEcoMar_BlackSeaCruises_2003_2011_2647	online databases
Apseudopsis ostroumovi	43.84	29.65	70.97	2007	GeoEcoMar_BlackSeaCruises_2003_2011_2648	online databases
Apseudopsis ostroumovi	43.85	29.6	70.2	2007	GeoEcoMar_BlackSeaCruises_2003_2011_2646	online databases
Apseudopsis ostroumovi	43.87	29.55	68.8	2007	GeoEcoMar_BlackSeaCruises_2003_2011_2644	online databases
Apseudopsis ostroumovi	43.87	29.7	70.3	2007	GeoEcoMar_BlackSeaCruises_2003_2011_2645	online databases
Apseudopsis ostroumovi	43.89	29.5	65	2007	GeoEcoMar_BlackSeaCruises_2003_2011_2641	online databases
Apseudopsis ostroumovi	43.89	29.65	70.18	2007	GeoEcoMar_BlackSeaCruises_2003_2011_2642	online databases
Apseudopsis ostroumovi	43.89	29.73	70.6	2007	GeoEcoMar_BlackSeaCruises_2003_2011_2643	online databases
Apseudopsis ostroumovi	43.9	29.58	68	2007	GeoEcoMar_BlackSeaCruises_2003_2011_2638	online databases
Apseudopsis ostroumovi	43.9	29.6	66.8	2007	GeoEcoMar_BlackSeaCruises_2003_2011_2639	online databases
Apseudopsis ostroumovi	43.9	29.68	68	2007	GeoEcoMar_BlackSeaCruises_2003_2011_2640	online databases
Apseudopsis ostroumovi	43.92	29.55	69	2007	GeoEcoMar_BlackSeaCruises_2003_2011_2637	online databases
Apseudopsis ostroumovi	43.94	29.53	65.2	2007	GeoEcoMar_BlackSeaCruises_2003_2011_2633	online databases
Apseudopsis ostroumovi	43.94	29.65	64	2007	GeoEcoMar_BlackSeaCruises_2003_2011_2634	online databases
Apseudopsis ostroumovi	43.94	29.68	64	2007	GeoEcoMar_BlackSeaCruises_2003_2011_2635	online databases
Apseudopsis ostroumovi	43.94	29.73	67.6	2007	GeoEcoMar_BlackSeaCruises_2003_2011_2636	online databases
Apseudopsis ostroumovi	43.95	29.51	68.5	2007	GeoEcoMar_BlackSeaCruises_2003_2011_2631	online databases
Apseudopsis ostroumovi	43.96	29.6	67.5	2007	GeoEcoMar_BlackSeaCruises_2003_2011_2632	online databases
Apseudopsis ostroumovi	43.97	29.5	63.9	2007	GeoEcoMar_BlackSeaCruises_2003_2011_2629	online databases
Apseudopsis ostroumovi	43.97	29.5	65	2003	GeoEcoMar_BlackSeaCruises_2003_2011_323	online databases
Apseudopsis ostroumovi	43.97	29.51	60.94	2010	GeoEcoMar_BlackSeaCruises_2003_2011_3999	online databases
Apseudopsis ostroumovi	43.97	29.55	66.2	2007	GeoEcoMar_BlackSeaCruises_2003_2011_2630	online databases
Apseudopsis ostroumovi	43.98	29.52	65	2011	GeoEcoMar_BlackSeaCruises_2003_2011_4006	online databases
Apseudopsis ostroumovi	43.99	29.73	67.3	2007	GeoEcoMar_BlackSeaCruises_2003_2011_2628	online databases
Apseudopsis ostroumovi	44	29.58	65.81	2006	GeoEcoMar_BlackSeaCruises_2003_2011_2626	online databases
Apseudopsis ostroumovi	44	29.65	68.77	2006	GeoEcoMar_BlackSeaCruises_2003_2011_2627	online databases
Apseudopsis ostroumovi	44.02	29.53	63.7	2006	GeoEcoMar_BlackSeaCruises_2003_2011_2624	online databases
Apseudopsis ostroumovi	44.02	29.6	66.83	2006	GeoEcoMar_BlackSeaCruises_2003_2011_2625	online databases
Apseudopsis ostroumovi	44.04	29.63	65.01	2006	GeoEcoMar_BlackSeaCruises_2003_2011_2623	online databases
Apseudopsis ostroumovi	44.0565	29.258	53	1997	GeoEcoMar_Ro/Uk-BlackSea-1997_217	online databases
Apseudopsis ostroumovi	44.07	29.6	64.51	2006	GeoEcoMar_BlackSeaCruises_2003_2011_2622	online databases
Apseudopsis ostroumovi	44.08	29.03	43.38	2010	GeoEcoMar_BlackSeaCruises_2003_2011_3998	online databases
Apseudopsis ostroumovi	44.08	29.03	46.3	2010	GeoEcoMar_BlackSeaCruises_2003_2011_4003	online databases
Apseudopsis ostroumovi	44.08	29.03	47	2011	GeoEcoMar_BlackSeaCruises_2003_2011_4005	online databases
Apseudopsis ostroumovi	44.1	29.58	61.78	2006	GeoEcoMar_BlackSeaCruises_2003_2011_2621	online databases
Apseudopsis ostroumovi	44.14	29.63	62.37	2006	GeoEcoMar_BlackSeaCruises_2003_2011_2620	online databases
Apseudopsis ostroumovi	44.16	28.78	26	1977	NIMRD_Historical Zoobenthos NIMRD_1977_786	online databases
Apseudopsis ostroumovi	44.16	28.88	34	1988	NIMRD_Historical Zoobenthos NIMRD_1988_478	online databases
Apseudopsis ostroumovi	44.16	29.02	52	1995	NIMRD_Historical Zoobenthos NIMRD_1995_1971	online databases
Apseudopsis ostroumovi	44.16	29.02	53	1994	NIMRD_Historical Zoobenthos NIMRD_1994_1949	online databases
Apseudopsis ostroumovi	44.16	29.08	42	1999	NIMRD_Historical Zoobenthos NIMRD_1999_2193	online databases
Apseudopsis ostroumovi	44.16	29.08	46	1983	NIMRD_Historical Zoobenthos NIMRD_1983_1205	online databases
Apseudopsis ostroumovi	44.16	29.08	47	1994	NIMRD_Historical Zoobenthos NIMRD_1994_1939	online databases
Apseudopsis ostroumovi	44.16	29.22	52	1987	NIMRD_Historical Zoobenthos NIMRD_1987_328	online databases
Apseudopsis ostroumovi	44.16	29.22	53	1988	NIMRD_Historical Zoobenthos NIMRD_1988_497	online databases
Apseudopsis ostroumovi	44.16	29.22	54	1982	NIMRD_Historical Zoobenthos NIMRD_1982_1095	online databases
Apseudopsis ostroumovi	44.16	29.36	54	1990	NIMRD_Historical Zoobenthos NIMRD_1990_694	online databases
Apseudopsis ostroumovi	44.16	29.44	64	1993	NIMRD_Historical Zoobenthos NIMRD_1993_1856	online databases
Apseudopsis ostroumovi	44.16	29.45	63	1995	NIMRD_Historical Zoobenthos NIMRD_1995_2025	online databases
Apseudopsis ostroumovi	44.16	29.45	64	1991	NIMRD_Historical Zoobenthos NIMRD_1991_1676	online databases
Apseudopsis ostroumovi	44.16	29.5	57.6	2006	GeoEcoMar_BlackSeaCruises_2003_2011_2618	online databases
Apseudopsis ostroumovi	44.16	29.58	58.92	2006	GeoEcoMar_BlackSeaCruises_2003_2011_2619	online databases
Apseudopsis ostroumovi	44.16	30.02	68	1993	NIMRD_Historical Zoobenthos NIMRD_1993_1798	online databases
Apseudopsis ostroumovi	44.16	30.02	74	1992	NIMRD_Historical Zoobenthos NIMRD_1992_1761	online databases
Apseudopsis ostroumovi	44.16	30.2	87	1992	NIMRD_Historical Zoobenthos NIMRD_1992_1764	online databases
Apseudopsis ostroumovi	44.19	29.71	66	1986	2572	online databases
Apseudopsis ostroumovi	44.28	29.15	34	1995	NIMRD_Historical Zoobenthos NIMRD_1995_1877	online databases
Apseudopsis ostroumovi	44.28	29.15	37	1997	NIMRD_Historical Zoobenthos NIMRD_1997_2183	online databases
Apseudopsis ostroumovi	44.2993	30.0823	71.5	1997	GeoEcoMar_Ro/Uk-BlackSea-1997_315	online databases
Apseudopsis ostroumovi	44.3	30.29	55	1997	NIMRD_Historical Zoobenthos NIMRD_1997_2040	online databases
Apseudopsis ostroumovi	44.324	29.391	54	2002	2002-04_Chituc__44.324_29.391_54_54_NIMRD_macrozoobenthos_danube_mouths_2000_2010_Apseudopsis ostroumovi_urn:lsid:marinespecies.org:taxname:136277__present	online databases
Apseudopsis ostroumovi	44.33	30.52	88.02	2010	GeoEcoMar_BlackSeaCruises_2003_2011_4002	online databases
Apseudopsis ostroumovi	44.58	30.09	65	2003	GeoEcoMar_BlackSeaCruises_2003_2011_326	online databases
Apseudopsis ostroumovi	44.59	30.1	64	2011	GeoEcoMar_BlackSeaCruises_2003_2011_4010	online databases
Apseudopsis ostroumovi	44.65	30.15	60	1984	2349	online databases
Apseudopsis ostroumovi	44.66	29.81	50.23	2010	GeoEcoMar_BlackSeaCruises_2003_2011_4001	online databases
Apseudopsis ostroumovi	44.66	29.81	53.45	2010	GeoEcoMar_BlackSeaCruises_2003_2011_4004	online databases
Apseudopsis ostroumovi	44.67	29.81	54	2011	GeoEcoMar_BlackSeaCruises_2003_2011_4009	online databases
Apseudopsis ostroumovi	44.6767	29.75	48.5	1979	NIMRD_Historical Zoobenthos NIMRD_1979_294	online databases
Apseudopsis ostroumovi	44.6767	29.75	49	1977	NIMRD_Historical Zoobenthos NIMRD_1977_292	online databases
Apseudopsis ostroumovi	44.6767	29.75	50	2012	2012-10_Portita_44.676667_29.75_50_50_NIMRD_zoobenthos_danube_mouths_2011_2015_216_Apseudopsis ostroumovi_urn:lsid:marinespecies.org:taxname:136290_present	online databases
Apseudopsis ostroumovi	44.6767	29.75	52	1977	NIMRD_Historical Zoobenthos NIMRD_1977_291	online databases
Apseudopsis ostroumovi	44.677	29.75	50	2003	2003-05_Portita__44.677_29.75_50_50_NIMRD_macrozoobenthos_danube_mouths_2000_2010_Apseudopsis ostroumovi_urn:lsid:marinespecies.org:taxname:136277__present	online databases
Apseudopsis ostroumovi	44.73	31.6992	129	1997	GeoEcoMar_Ro/Uk-BlackSea-1997_336	online databases
Apseudopsis ostroumovi	44.75	30.87	82	1992	6897	online databases
Apseudopsis ostroumovi	44.75	31.59	87	2003	GeoEcoMar_BlackSeaCruises_2003_2011_329	online databases
Apseudopsis ostroumovi	44.8167	29.8167	46	1960	GeoEcoMar_predeltaicBlakSea_Benthos_1960_51	online databases
Apseudopsis ostroumovi	44.85	36.48	52	2000	5402	online databases
Apseudopsis ostroumovi	44.87	30.7	61	1992	6914	online databases
Apseudopsis ostroumovi	44.87	30.87	65	1992	6903	online databases
Apseudopsis ostroumovi	44.8836	29.701	37	1995	NIMRD_Historical Zoobenthos NIMRD_1995_1795	online databases
Apseudopsis ostroumovi	44.8836	29.8529	41	1977	NIMRD_Historical Zoobenthos NIMRD_1977_290	online databases
Apseudopsis ostroumovi	44.8836	29.8529	42	1978	NIMRD_Historical Zoobenthos NIMRD_1978_293	online databases
Apseudopsis ostroumovi	44.9	29.9167	38.5	1960	GeoEcoMar_predeltaicBlakSea_Benthos_1960_48	online databases
Apseudopsis ostroumovi	44.91	30.45	50	1980	6624	online databases
Apseudopsis ostroumovi	44.9167	29.8667	41	1960	GeoEcoMar_predeltaicBlakSea_Benthos_1960_50	online databases
Apseudopsis ostroumovi	44.9167	29.8833	41	1960	GeoEcoMar_predeltaicBlakSea_Benthos_1960_46	online databases
Apseudopsis ostroumovi	44.95	30.26	47	2003	GeoEcoMar_BlackSeaCruises_2003_2011_327	online databases
Apseudopsis ostroumovi	44.9815	30.5773	52	2016	Al1UOEoWbrjokk65IHtOLg==_248-86-18	online databases
Apseudopsis ostroumovi	44.9833	29.95	37	1960	GeoEcoMar_predeltaicBlakSea_Benthos_1960_49	online databases
Apseudopsis ostroumovi	45	29.48	33	1995	NIMRD_Historical Zoobenthos NIMRD_1995_1855	online databases
Apseudopsis ostroumovi	45	30.15	50	1987	NIMRD_Historical Zoobenthos NIMRD_1977_296	online databases
Apseudopsis ostroumovi	45	30.25	42	1959	BlackSea-MacroB_Rom-719	online databases
Apseudopsis ostroumovi	45	32.01	62	1992	6737	online databases
Apseudopsis ostroumovi	45.0167	29.95	35	1960	GeoEcoMar_predeltaicBlakSea_Benthos_1960_47	online databases
Apseudopsis ostroumovi	45.0443	30.1582	41	1997	GeoEcoMar_Ro/Uk-BlackSea-1997_164	online databases
Apseudopsis ostroumovi	45.1228	30.02	40	1987	NIMRD_Historical Zoobenthos NIMRD_1977_295	online databases
Apseudopsis ostroumovi	45.15	29.95	29	1960	GeoEcoMar_predeltaicBlakSea_Benthos_1960_45	online databases
Apseudopsis ostroumovi	45.1622	31.0493	53.5	1997	GeoEcoMar_Ro/Uk-BlackSea-1997_252	online databases
Apseudopsis ostroumovi	45.2533	30.2106	25	#N/A	#N/A	online databases
Apseudopsis ostroumovi	45.5065	30.5048	23.6	#N/A	#N/A	online databases
Apseudopsis ostroumovi	45.6167	32.1333	37	1981	IBSS NASU_Benthos from Karkinitsky Gulf_211	online databases
Apseudopsis ostroumovi	45.6282	31.8012	36.8	1997	GeoEcoMar_Ro/Uk-BlackSea-1997_133	online databases
Apseudopsis ostroumovi	45.66	31.83	33	1986	3572	online databases
Apseudopsis ostroumovi	45.6663	31.2509	42	2016	BQMVFRoYQzNy0I+XTshBtA==_254-86-20	online databases
Apseudopsis ostroumovi	45.8	31.25	33	1986	3008	online databases
Apseudopsis ostroumovi	46.0489	30.4893	13	1997	GeoEcoMar_Ro/Uk-BlackSea-1997_027	online databases
Apseudopsis ostroumovi	44.0831	28.6442	#N/A	#N/A	#N/A	Bacescu and Carausu, 1947
Apseudopsis ostroumovi	44.1823	28.6622	#N/A	#N/A	#N/A	Bacescu and Carausu, 1947
Apseudopsis ostroumovi	43.7266	28.5795	45	#N/A	#N/A	Bacescu and Carausu, 1947
Apseudopsis ostroumovi	43.3609	28.4664	#N/A	#N/A	#N/A	Bacescu and Carausu, 1947
Apseudopsis ostroumovi	31.8135	34.4815	62	#N/A	#N/A	Bamber et al., 2009
Apseudopsis ostroumovi	34.7179	11.3035	3.28	#N/A	#N/A	Esquete et al., 2019
Apseudopsis ostroumovi	34.6903	11.3255	10.03	#N/A	#N/A	Esquete et al., 2019
Apseudopsis ostroumovi	34.3429	10.1982	2.83	#N/A	#N/A	Esquete et al., 2019
Apseudopsis ostroumovi	34.3254	10.172	0.87	#N/A	#N/A	Esquete et al., 2019
Apseudopsis ostroumovi	41.4167	28.9833	81	#N/A	#N/A	Gutu, 2002
Apseudopsis ostroumovi	0	0	0	1951	8994	online databases
Apseudopsis ostroumovi	45.2533	30.2106	25	2019	#N/A	online databases
Apseudopsis rogi	28.0469	-16.7147	11	#N/A	#N/A	Esquete et al., 2016
Apseudopsis rogi	27.7819	-17.9025	6	#N/A	#N/A	Esquete et al., 2016
Apseudopsis tridens	32.8307	34.9535	#N/A	#N/A	#N/A	Gutu, 2002
Apseudopsis tuski	-40.1133	148.405	#N/A	#N/A	J55784	online databases
Apseudopsis tuski	-39.215	146.455	#N/A	#N/A	J55783	online databases
Apseudopsis tuski	-39.1167	143.243	#N/A	#N/A	J55785	online databases
Apseudopsis tuski	-38.895	147.108	#N/A	#N/A	J55942-4	online databases
Apseudopsis tuski	-38.5403	146.495	#N/A	#N/A	J51305	online databases
Apseudopsis tuski	-38.5033	144.25	#N/A	#N/A	J51303	online databases
Apseudopsis tuski	-38.4963	145.105	#N/A	#N/A	J55849	online databases
Apseudopsis tuski	-38.4413	145.217	#N/A	#N/A	J56179	online databases
Apseudopsis tuski	-38.3615	145.225	#N/A	#N/A	J55857	online databases
Apseudopsis tuski	-38.3615	145.238	#N/A	#N/A	J57678	online databases
Apseudopsis tuski	-38.3565	145.234	#N/A	#N/A	J55825	online databases
Apseudopsis tuski	-38.3555	145.227	#N/A	#N/A	J56181	online databases
Apseudopsis tuski	-38.3528	145.233	#N/A	#N/A	J56171	online databases
Apseudopsis tuski	-38.349	145.235	#N/A	#N/A	J56192	online databases
Apseudopsis tuski	-38.3472	145.225	#N/A	#N/A	J55931	online databases
Apseudopsis tuski	-38.3382	145.236	#N/A	#N/A	J57656	online databases
Apseudopsis tuski	-38.3197	144.627	#N/A	#N/A	J51304	online databases
Apseudopsis tuski	-38.3093	145.245	#N/A	#N/A	J57661	online databases
Apseudopsis tuski	-38.2888	144.04	#N/A	#N/A	J51301	online databases
Apseudopsis tuski	-38.21	145.14	#N/A	#N/A	J66521	online databases
Apseudopsis tuski	-38.07	148	#N/A	#N/A	J57552	online databases
Apseudopsis tuski	-37.98	148.45	51	#N/A	J55782	online databases
Apseudopsis tuski	-37.92	148	#N/A	#N/A	J51306	online databases
Apseudopsis tuski	-37.9012	148.202	#N/A	#N/A	J23646	online databases
Apseudopsis tuski	-37.9007	148.261	#N/A	#N/A	J23648	online databases
Apseudopsis tuski	-37.8903	148.195	#N/A	#N/A	J23647	online databases
Apseudopsis tuski	-37.8898	148.257	#N/A	#N/A	J28562	online databases
Apseudopsis tuski	-37.8863	148.483	#N/A	#N/A	J28539	online databases
Apseudopsis tuski	-37.8857	148.482	#N/A	#N/A	J28573	online databases
Apseudopsis tuski	-37.8783	148.418	#N/A	#N/A	J28554	online databases
Apseudopsis tuski	-37.8775	148.702	#N/A	#N/A	J28576	online databases
Apseudopsis tuski	-37.8665	148.25	#N/A	#N/A	J23645	online databases
Apseudopsis tuski	-37.8628	148.227	#N/A	#N/A	J23644	online databases
Apseudopsis tuski	-37.8617	148.243	#N/A	#N/A	J28567	online databases
Apseudopsis tuski	-37.8607	148.471	#N/A	#N/A	J28623	online databases
Apseudopsis tuski	-37.8572	148.729	#N/A	#N/A	J28625	online databases
Apseudopsis tuski	-37.8547	148.729	#N/A	#N/A	J23631	online databases
Apseudopsis tuski	-37.8532	148.642	#N/A	#N/A	J28556	online databases
Apseudopsis tuski	-37.8485	148.214	#N/A	#N/A	J28577	online databases
Apseudopsis tuski	-37.8438	148.725	#N/A	#N/A	J28555	online databases
Apseudopsis tuski	-37.8428	148.417	#N/A	#N/A	J23654	online databases
Apseudopsis tuski	-37.8413	148.676	#N/A	#N/A	J28624	online databases
[truncated: 81 more rows]
